# Supplementary material for: Integrated population modelling reveals potential drivers of demography from partially aligned data: a case study of snowy plover declines under human stressors
Source: PeerJ. 2021 Nov 15;9:e12475. doi: 10.7717/peerj.12475 (PMC8601057; doi:10.7717/peerj.12475)
Supplement: Supplemental Information 5 — id: individual identity cohort: age-sex class at the first capture region: region of the survey, Texas, New Mexico, or Oklahoma f: year of the first encounter year_1998 ~ year_2018: encounter history from 1998 through 2018 [file peerj-09-12475-s005.csv]

id	cohort	region	f	year_1998	year_1999	year_2000	year_2001	year_2002	year_2003	year_2004	year_2005	year_2006	year_2007	year_2008	year_2009	year_2010	year_2011	year_2012	year_2013	year_2014	year_2015	year_2016	year_2017	year_2018
2381-00494	af	New Mexico	16	0	0	0	0	0	0	0	0	0	0	0	0	0	0	0	1	0	0	0	0	0
2381-00495	af	New Mexico	16	0	0	0	0	0	0	0	0	0	0	0	0	0	0	0	1	0	0	0	0	0
2381-00510	af	New Mexico	16	0	0	0	0	0	0	0	0	0	0	0	0	0	0	0	1	0	0	0	0	0
2381-00511	af	New Mexico	16	0	0	0	0	0	0	0	0	0	0	0	0	0	0	0	1	0	0	0	0	0
2381-00515	af	New Mexico	16	0	0	0	0	0	0	0	0	0	0	0	0	0	0	0	1	0	0	0	0	0
2381-00516	af	New Mexico	16	0	0	0	0	0	0	0	0	0	0	0	0	0	0	0	1	0	0	0	0	0
2381-00517	af	New Mexico	16	0	0	0	0	0	0	0	0	0	0	0	0	0	0	0	1	0	0	0	1	0
2381-08306	af	New Mexico	17	0	0	0	0	0	0	0	0	0	0	0	0	0	0	0	0	1	0	0	0	0
2381-08307	af	New Mexico	17	0	0	0	0	0	0	0	0	0	0	0	0	0	0	0	0	1	0	0	0	0
2381-08308	af	New Mexico	17	0	0	0	0	0	0	0	0	0	0	0	0	0	0	0	0	1	0	0	0	0
2381-08310	af	New Mexico	17	0	0	0	0	0	0	0	0	0	0	0	0	0	0	0	0	1	0	0	0	0
2381-08326	af	New Mexico	17	0	0	0	0	0	0	0	0	0	0	0	0	0	0	0	0	1	0	0	0	0
2381-08328	af	New Mexico	17	0	0	0	0	0	0	0	0	0	0	0	0	0	0	0	0	1	0	0	0	0
2381-08329	af	New Mexico	17	0	0	0	0	0	0	0	0	0	0	0	0	0	0	0	0	1	0	0	0	0
2381-08333	af	New Mexico	17	0	0	0	0	0	0	0	0	0	0	0	0	0	0	0	0	1	0	0	0	0
2381-08335	af	New Mexico	17	0	0	0	0	0	0	0	0	0	0	0	0	0	0	0	0	1	0	0	0	0
2381-11926	af	New Mexico	20	0	0	0	0	0	0	0	0	0	0	0	0	0	0	0	0	0	0	0	1	2
2381-11927	af	New Mexico	20	0	0	0	0	0	0	0	0	0	0	0	0	0	0	0	0	0	0	0	1	0
2381-11930	af	New Mexico	20	0	0	0	0	0	0	0	0	0	0	0	0	0	0	0	0	0	0	0	1	0
2381-11931	af	New Mexico	20	0	0	0	0	0	0	0	0	0	0	0	0	0	0	0	0	0	0	0	1	0
2381-11932	af	New Mexico	20	0	0	0	0	0	0	0	0	0	0	0	0	0	0	0	0	0	0	0	1	0
2381-11873	af	New Mexico	21	0	0	0	0	0	0	0	0	0	0	0	0	0	0	0	0	0	0	0	0	1
2381-11874	af	New Mexico	21	0	0	0	0	0	0	0	0	0	0	0	0	0	0	0	0	0	0	0	0	1
2381-11875	af	New Mexico	21	0	0	0	0	0	0	0	0	0	0	0	0	0	0	0	0	0	0	0	0	1
2381-11897	af	New Mexico	21	0	0	0	0	0	0	0	0	0	0	0	0	0	0	0	0	0	0	0	0	1
2381-11898	af	New Mexico	21	0	0	0	0	0	0	0	0	0	0	0	0	0	0	0	0	0	0	0	0	1
2381-11899	af	New Mexico	21	0	0	0	0	0	0	0	0	0	0	0	0	0	0	0	0	0	0	0	0	1
2851-00803	af	New Mexico	21	0	0	0	0	0	0	0	0	0	0	0	0	0	0	0	0	0	0	0	0	1
2851-00819	af	New Mexico	21	0	0	0	0	0	0	0	0	0	0	0	0	0	0	0	0	0	0	0	0	1
2381-08309	am	New Mexico	17	0	0	0	0	0	0	0	0	0	0	0	0	0	0	0	0	1	0	0	0	0
2381-08327	am	New Mexico	17	0	0	0	0	0	0	0	0	0	0	0	0	0	0	0	0	1	0	0	0	0
2381-08330	am	New Mexico	17	0	0	0	0	0	0	0	0	0	0	0	0	0	0	0	0	1	0	0	0	0
2381-08331	am	New Mexico	17	0	0	0	0	0	0	0	0	0	0	0	0	0	0	0	0	1	0	0	0	0
2381-08332	am	New Mexico	17	0	0	0	0	0	0	0	0	0	0	0	0	0	0	0	0	1	0	0	0	0
2381-11928	am	New Mexico	20	0	0	0	0	0	0	0	0	0	0	0	0	0	0	0	0	0	0	0	1	2
2381-11929	am	New Mexico	20	0	0	0	0	0	0	0	0	0	0	0	0	0	0	0	0	0	0	0	1	0
2381-11933	am	New Mexico	20	0	0	0	0	0	0	0	0	0	0	0	0	0	0	0	0	0	0	0	1	2
2381-11934	am	New Mexico	20	0	0	0	0	0	0	0	0	0	0	0	0	0	0	0	0	0	0	0	1	0
2851-00802	am	New Mexico	21	0	0	0	0	0	0	0	0	0	0	0	0	0	0	0	0	0	0	0	0	1
2851-00820	am	New Mexico	21	0	0	0	0	0	0	0	0	0	0	0	0	0	0	0	0	0	0	0	0	1
2381-00518	au	New Mexico	16	0	0	0	0	0	0	0	0	0	0	0	0	0	0	0	1	0	0	0	0	0
2381-00569	jf	New Mexico	16	0	0	0	0	0	0	0	0	0	0	0	0	0	0	0	1	0	0	0	0	0
2381-00570	jf	New Mexico	16	0	0	0	0	0	0	0	0	0	0	0	0	0	0	0	1	0	0	0	0	0
2381-00571	jf	New Mexico	16	0	0	0	0	0	0	0	0	0	0	0	0	0	0	0	1	0	0	0	0	0
2381-08303	jf	New Mexico	17	0	0	0	0	0	0	0	0	0	0	0	0	0	0	0	0	1	0	0	0	0
2381-08305	jf	New Mexico	17	0	0	0	0	0	0	0	0	0	0	0	0	0	0	0	0	1	0	0	0	0
2381-11895	jf	New Mexico	21	0	0	0	0	0	0	0	0	0	0	0	0	0	0	0	0	0	0	0	0	1
2381-11896	jf	New Mexico	21	0	0	0	0	0	0	0	0	0	0	0	0	0	0	0	0	0	0	0	0	1
2851-00801	jf	New Mexico	21	0	0	0	0	0	0	0	0	0	0	0	0	0	0	0	0	0	0	0	0	1
2851-00818	jf	New Mexico	21	0	0	0	0	0	0	0	0	0	0	0	0	0	0	0	0	0	0	0	0	1
2381-08325	jm	New Mexico	17	0	0	0	0	0	0	0	0	0	0	0	0	0	0	0	0	1	0	0	0	0
2381-08334	jm	New Mexico	17	0	0	0	0	0	0	0	0	0	0	0	0	0	0	0	0	1	0	0	0	0
2381-11900	jm	New Mexico	21	0	0	0	0	0	0	0	0	0	0	0	0	0	0	0	0	0	0	0	0	1
2381-00508	ju	New Mexico	16	0	0	0	0	0	0	0	0	0	0	0	0	0	0	0	1	0	0	0	0	0
2381-00509	ju	New Mexico	16	0	0	0	0	0	0	0	0	0	0	0	0	0	0	0	1	0	0	0	0	0
2381-00567	ju	New Mexico	16	0	0	0	0	0	0	0	0	0	0	0	0	0	0	0	1	0	0	0	0	0
2381-00568	ju	New Mexico	16	0	0	0	0	0	0	0	0	0	0	0	0	0	0	0	1	0	0	0	0	0
2381-00488	af	Oklahoma	16	0	0	0	0	0	0	0	0	0	0	0	0	0	0	0	1	0	0	0	0	0
2381-00489	af	Oklahoma	16	0	0	0	0	0	0	0	0	0	0	0	0	0	0	0	1	0	0	0	0	0
2381-00490	af	Oklahoma	16	0	0	0	0	0	0	0	0	0	0	0	0	0	0	0	1	0	0	0	0	0
2381-00492	af	Oklahoma	16	0	0	0	0	0	0	0	0	0	0	0	0	0	0	0	1	0	0	0	0	0
2381-00493	af	Oklahoma	16	0	0	0	0	0	0	0	0	0	0	0	0	0	0	0	1	0	0	0	0	0
2381-00601	af	Oklahoma	16	0	0	0	0	0	0	0	0	0	0	0	0	0	0	0	1	0	0	0	0	0
2381-00602	af	Oklahoma	16	0	0	0	0	0	0	0	0	0	0	0	0	0	0	0	1	0	0	0	0	0
2381-00604	af	Oklahoma	16	0	0	0	0	0	0	0	0	0	0	0	0	0	0	0	1	0	0	0	0	0
2381-00605	af	Oklahoma	16	0	0	0	0	0	0	0	0	0	0	0	0	0	0	0	1	0	0	0	0	0
2381-00615	af	Oklahoma	16	0	0	0	0	0	0	0	0	0	0	0	0	0	0	0	1	0	0	0	0	0
2381-00616	af	Oklahoma	16	0	0	0	0	0	0	0	0	0	0	0	0	0	0	0	1	0	0	0	0	0
2381-00617	af	Oklahoma	16	0	0	0	0	0	0	0	0	0	0	0	0	0	0	0	1	0	0	0	0	0
2381-00619	af	Oklahoma	16	0	0	0	0	0	0	0	0	0	0	0	0	0	0	0	1	0	0	0	0	0
2381-00634	af	Oklahoma	16	0	0	0	0	0	0	0	0	0	0	0	0	0	0	0	1	0	0	0	0	0
2381-00635	af	Oklahoma	16	0	0	0	0	0	0	0	0	0	0	0	0	0	0	0	1	0	0	0	0	0
2381-00642	af	Oklahoma	16	0	0	0	0	0	0	0	0	0	0	0	0	0	0	0	1	0	0	0	0	0
2381-00643	af	Oklahoma	16	0	0	0	0	0	0	0	0	0	0	0	0	0	0	0	1	0	0	0	0	0
2381-00655	af	Oklahoma	16	0	0	0	0	0	0	0	0	0	0	0	0	0	0	0	1	0	0	0	0	0
2381-00659	af	Oklahoma	16	0	0	0	0	0	0	0	0	0	0	0	0	0	0	0	1	0	0	0	0	0
2381-00660	af	Oklahoma	16	0	0	0	0	0	0	0	0	0	0	0	0	0	0	0	1	0	0	0	0	0
2381-00663	af	Oklahoma	16	0	0	0	0	0	0	0	0	0	0	0	0	0	0	0	1	0	0	0	0	0
2381-00664	af	Oklahoma	16	0	0	0	0	0	0	0	0	0	0	0	0	0	0	0	1	0	0	0	0	0
2381-00669	af	Oklahoma	16	0	0	0	0	0	0	0	0	0	0	0	0	0	0	0	1	0	0	0	0	0
2381-00678	af	Oklahoma	16	0	0	0	0	0	0	0	0	0	0	0	0	0	0	0	1	0	0	0	0	0
2381-00682	af	Oklahoma	16	0	0	0	0	0	0	0	0	0	0	0	0	0	0	0	1	0	0	0	0	0
2381-00684	af	Oklahoma	16	0	0	0	0	0	0	0	0	0	0	0	0	0	0	0	1	0	0	0	0	0
2381-00687	af	Oklahoma	16	0	0	0	0	0	0	0	0	0	0	0	0	0	0	0	1	0	0	0	0	0
2381-00694	af	Oklahoma	16	0	0	0	0	0	0	0	0	0	0	0	0	0	0	0	1	0	0	0	0	0
2381-00695	af	Oklahoma	16	0	0	0	0	0	0	0	0	0	0	0	0	0	0	0	1	0	0	0	0	0
2381-00697	af	Oklahoma	16	0	0	0	0	0	0	0	0	0	0	0	0	0	0	0	1	0	0	0	0	0
2381-00699	af	Oklahoma	16	0	0	0	0	0	0	0	0	0	0	0	0	0	0	0	1	0	0	0	0	0
2381-00700	af	Oklahoma	16	0	0	0	0	0	0	0	0	0	0	0	0	0	0	0	1	1	0	0	0	0
2381-00572	af	Oklahoma	17	0	0	0	0	0	0	0	0	0	0	0	0	0	0	0	0	1	0	0	0	2
2381-00573	af	Oklahoma	17	0	0	0	0	0	0	0	0	0	0	0	0	0	0	0	0	1	0	0	0	0
2381-00574	af	Oklahoma	17	0	0	0	0	0	0	0	0	0	0	0	0	0	0	0	0	1	0	0	0	0
2381-00575	af	Oklahoma	17	0	0	0	0	0	0	0	0	0	0	0	0	0	0	0	0	1	0	0	0	0
2381-00580	af	Oklahoma	17	0	0	0	0	0	0	0	0	0	0	0	0	0	0	0	0	1	0	0	0	0
2381-00582	af	Oklahoma	17	0	0	0	0	0	0	0	0	0	0	0	0	0	0	0	0	1	0	0	0	0
2381-00584	af	Oklahoma	17	0	0	0	0	0	0	0	0	0	0	0	0	0	0	0	0	1	0	0	0	0
2381-00585	af	Oklahoma	17	0	0	0	0	0	0	0	0	0	0	0	0	0	0	0	0	1	0	0	0	0
2381-00586	af	Oklahoma	17	0	0	0	0	0	0	0	0	0	0	0	0	0	0	0	0	1	0	0	0	0
2381-00588	af	Oklahoma	17	0	0	0	0	0	0	0	0	0	0	0	0	0	0	0	0	1	0	0	0	0
2381-00589	af	Oklahoma	17	0	0	0	0	0	0	0	0	0	0	0	0	0	0	0	0	1	0	0	0	2
2381-00590	af	Oklahoma	17	0	0	0	0	0	0	0	0	0	0	0	0	0	0	0	0	1	0	0	0	0
2381-00592	af	Oklahoma	17	0	0	0	0	0	0	0	0	0	0	0	0	0	0	0	0	1	0	0	0	0
2381-00597	af	Oklahoma	17	0	0	0	0	0	0	0	0	0	0	0	0	0	0	0	0	1	0	0	0	0
2381-00598	af	Oklahoma	17	0	0	0	0	0	0	0	0	0	0	0	0	0	0	0	0	1	0	0	0	0
2381-08200	af	Oklahoma	17	0	0	0	0	0	0	0	0	0	0	0	0	0	0	0	0	1	0	0	0	0
2381-08207	af	Oklahoma	17	0	0	0	0	0	0	0	0	0	0	0	0	0	0	0	0	1	0	0	0	0
2381-08208	af	Oklahoma	17	0	0	0	0	0	0	0	0	0	0	0	0	0	0	0	0	1	0	0	0	0
2381-08220	af	Oklahoma	17	0	0	0	0	0	0	0	0	0	0	0	0	0	0	0	0	1	0	0	0	0
2381-08221	af	Oklahoma	17	0	0	0	0	0	0	0	0	0	0	0	0	0	0	0	0	1	0	0	0	3
2381-08222	af	Oklahoma	17	0	0	0	0	0	0	0	0	0	0	0	0	0	0	0	0	1	0	0	0	0
2381-08223	af	Oklahoma	17	0	0	0	0	0	0	0	0	0	0	0	0	0	0	0	0	1	0	0	0	0
2381-08224	af	Oklahoma	17	0	0	0	0	0	0	0	0	0	0	0	0	0	0	0	0	1	0	0	0	0
2381-08226	af	Oklahoma	17	0	0	0	0	0	0	0	0	0	0	0	0	0	0	0	0	1	0	0	0	0
2381-08228	af	Oklahoma	17	0	0	0	0	0	0	0	0	0	0	0	0	0	0	0	0	1	0	0	0	0
2381-08229	af	Oklahoma	17	0	0	0	0	0	0	0	0	0	0	0	0	0	0	0	0	1	0	0	0	0
2381-08230	af	Oklahoma	17	0	0	0	0	0	0	0	0	0	0	0	0	0	0	0	0	1	0	0	0	0
2381-08233	af	Oklahoma	17	0	0	0	0	0	0	0	0	0	0	0	0	0	0	0	0	1	0	0	0	0
2381-08234	af	Oklahoma	17	0	0	0	0	0	0	0	0	0	0	0	0	0	0	0	0	1	0	0	0	0
2381-08236	af	Oklahoma	17	0	0	0	0	0	0	0	0	0	0	0	0	0	0	0	0	1	0	0	0	0
2381-08237	af	Oklahoma	17	0	0	0	0	0	0	0	0	0	0	0	0	0	0	0	0	1	0	0	0	0
2381-08240	af	Oklahoma	17	0	0	0	0	0	0	0	0	0	0	0	0	0	0	0	0	1	0	0	0	0
2381-08247	af	Oklahoma	17	0	0	0	0	0	0	0	0	0	0	0	0	0	0	0	0	1	0	0	0	0
2381-08250	af	Oklahoma	17	0	0	0	0	0	0	0	0	0	0	0	0	0	0	0	0	1	0	0	0	0
2381-08256	af	Oklahoma	17	0	0	0	0	0	0	0	0	0	0	0	0	0	0	0	0	1	0	0	0	0
2381-08261	af	Oklahoma	17	0	0	0	0	0	0	0	0	0	0	0	0	0	0	0	0	1	0	0	0	0
2381-08262	af	Oklahoma	17	0	0	0	0	0	0	0	0	0	0	0	0	0	0	0	0	1	0	0	0	0
2381-08263	af	Oklahoma	17	0	0	0	0	0	0	0	0	0	0	0	0	0	0	0	0	1	0	0	0	0
2381-08264	af	Oklahoma	17	0	0	0	0	0	0	0	0	0	0	0	0	0	0	0	0	1	0	0	0	0
2381-08265	af	Oklahoma	17	0	0	0	0	0	0	0	0	0	0	0	0	0	0	0	0	1	0	0	0	0
2381-08266	af	Oklahoma	17	0	0	0	0	0	0	0	0	0	0	0	0	0	0	0	0	1	0	0	0	0
2381-08267	af	Oklahoma	17	0	0	0	0	0	0	0	0	0	0	0	0	0	0	0	0	1	0	0	0	0
2381-08268	af	Oklahoma	17	0	0	0	0	0	0	0	0	0	0	0	0	0	0	0	0	1	0	0	0	0
2381-08269	af	Oklahoma	17	0	0	0	0	0	0	0	0	0	0	0	0	0	0	0	0	1	0	0	3	0
2381-08270	af	Oklahoma	17	0	0	0	0	0	0	0	0	0	0	0	0	0	0	0	0	1	0	0	0	0
2381-08271	af	Oklahoma	17	0	0	0	0	0	0	0	0	0	0	0	0	0	0	0	0	1	0	0	0	0
2381-08273	af	Oklahoma	17	0	0	0	0	0	0	0	0	0	0	0	0	0	0	0	0	1	0	0	0	0
2381-08274	af	Oklahoma	17	0	0	0	0	0	0	0	0	0	0	0	0	0	0	0	0	1	0	0	0	0
2381-08275	af	Oklahoma	17	0	0	0	0	0	0	0	0	0	0	0	0	0	0	0	0	1	0	0	0	0
2381-08277	af	Oklahoma	17	0	0	0	0	0	0	0	0	0	0	0	0	0	0	0	0	1	0	0	0	0
2381-08278	af	Oklahoma	17	0	0	0	0	0	0	0	0	0	0	0	0	0	0	0	0	1	0	0	0	0
2381-08280	af	Oklahoma	17	0	0	0	0	0	0	0	0	0	0	0	0	0	0	0	0	1	0	0	0	0
2381-08282	af	Oklahoma	17	0	0	0	0	0	0	0	0	0	0	0	0	0	0	0	0	1	0	0	0	0
2381-08283	af	Oklahoma	17	0	0	0	0	0	0	0	0	0	0	0	0	0	0	0	0	1	0	0	0	0
2381-08285	af	Oklahoma	17	0	0	0	0	0	0	0	0	0	0	0	0	0	0	0	0	1	0	0	0	0
2381-08286	af	Oklahoma	17	0	0	0	0	0	0	0	0	0	0	0	0	0	0	0	0	1	0	0	0	0
2381-08287	af	Oklahoma	17	0	0	0	0	0	0	0	0	0	0	0	0	0	0	0	0	1	0	0	0	0
2381-08288	af	Oklahoma	17	0	0	0	0	0	0	0	0	0	0	0	0	0	0	0	0	1	0	0	0	0
2381-08289	af	Oklahoma	17	0	0	0	0	0	0	0	0	0	0	0	0	0	0	0	0	1	0	0	0	0
2381-08291	af	Oklahoma	17	0	0	0	0	0	0	0	0	0	0	0	0	0	0	0	0	1	0	0	0	0
2381-08292	af	Oklahoma	17	0	0	0	0	0	0	0	0	0	0	0	0	0	0	0	0	1	0	0	0	0
2381-08297	af	Oklahoma	17	0	0	0	0	0	0	0	0	0	0	0	0	0	0	0	0	1	0	0	0	0
2381-08298	af	Oklahoma	17	0	0	0	0	0	0	0	0	0	0	0	0	0	0	0	0	1	0	0	0	0
2381-08299	af	Oklahoma	17	0	0	0	0	0	0	0	0	0	0	0	0	0	0	0	0	1	0	0	0	0
2381-08401	af	Oklahoma	17	0	0	0	0	0	0	0	0	0	0	0	0	0	0	0	0	1	0	0	0	0
2381-08404	af	Oklahoma	17	0	0	0	0	0	0	0	0	0	0	0	0	0	0	0	0	1	0	0	0	0
2381-08405	af	Oklahoma	17	0	0	0	0	0	0	0	0	0	0	0	0	0	0	0	0	1	0	0	0	0
2381-08407	af	Oklahoma	17	0	0	0	0	0	0	0	0	0	0	0	0	0	0	0	0	1	0	0	0	2
2381-08408	af	Oklahoma	17	0	0	0	0	0	0	0	0	0	0	0	0	0	0	0	0	1	0	0	0	0
2381-08409	af	Oklahoma	17	0	0	0	0	0	0	0	0	0	0	0	0	0	0	0	0	1	0	0	0	0
2381-08412	af	Oklahoma	17	0	0	0	0	0	0	0	0	0	0	0	0	0	0	0	0	1	0	0	0	0
2381-08414	af	Oklahoma	17	0	0	0	0	0	0	0	0	0	0	0	0	0	0	0	0	1	0	0	0	0
2381-08416	af	Oklahoma	17	0	0	0	0	0	0	0	0	0	0	0	0	0	0	0	0	1	0	0	0	0
2381-08418	af	Oklahoma	17	0	0	0	0	0	0	0	0	0	0	0	0	0	0	0	0	1	0	0	0	0
2381-08419	af	Oklahoma	17	0	0	0	0	0	0	0	0	0	0	0	0	0	0	0	0	1	0	0	0	0
2381-08420	af	Oklahoma	17	0	0	0	0	0	0	0	0	0	0	0	0	0	0	0	0	1	0	0	0	0
2381-08421	af	Oklahoma	17	0	0	0	0	0	0	0	0	0	0	0	0	0	0	0	0	1	0	0	0	0
2381-08427	af	Oklahoma	17	0	0	0	0	0	0	0	0	0	0	0	0	0	0	0	0	1	0	0	0	0
2381-08347	af	Oklahoma	18	0	0	0	0	0	0	0	0	0	0	0	0	0	0	0	0	0	1	0	0	0
2381-08349	af	Oklahoma	18	0	0	0	0	0	0	0	0	0	0	0	0	0	0	0	0	0	1	0	0	0
2381-08350	af	Oklahoma	18	0	0	0	0	0	0	0	0	0	0	0	0	0	0	0	0	0	1	0	0	0
2381-08351	af	Oklahoma	18	0	0	0	0	0	0	0	0	0	0	0	0	0	0	0	0	0	1	0	0	0
2381-08352	af	Oklahoma	18	0	0	0	0	0	0	0	0	0	0	0	0	0	0	0	0	0	1	0	0	0
2381-08353	af	Oklahoma	18	0	0	0	0	0	0	0	0	0	0	0	0	0	0	0	0	0	1	0	0	0
2381-08359	af	Oklahoma	18	0	0	0	0	0	0	0	0	0	0	0	0	0	0	0	0	0	1	0	0	0
2381-08360	af	Oklahoma	18	0	0	0	0	0	0	0	0	0	0	0	0	0	0	0	0	0	1	0	0	0
2381-08361	af	Oklahoma	18	0	0	0	0	0	0	0	0	0	0	0	0	0	0	0	0	0	1	0	0	0
2381-08362	af	Oklahoma	18	0	0	0	0	0	0	0	0	0	0	0	0	0	0	0	0	0	1	0	0	0
2381-08363	af	Oklahoma	18	0	0	0	0	0	0	0	0	0	0	0	0	0	0	0	0	0	1	0	0	0
2381-08372	af	Oklahoma	18	0	0	0	0	0	0	0	0	0	0	0	0	0	0	0	0	0	1	0	0	2
2381-08430	af	Oklahoma	18	0	0	0	0	0	0	0	0	0	0	0	0	0	0	0	0	0	1	0	0	3
2381-08432	af	Oklahoma	18	0	0	0	0	0	0	0	0	0	0	0	0	0	0	0	0	0	1	0	0	0
2381-08434	af	Oklahoma	18	0	0	0	0	0	0	0	0	0	0	0	0	0	0	0	0	0	1	0	0	0
2381-08435	af	Oklahoma	18	0	0	0	0	0	0	0	0	0	0	0	0	0	0	0	0	0	1	0	0	0
2381-08436	af	Oklahoma	18	0	0	0	0	0	0	0	0	0	0	0	0	0	0	0	0	0	1	0	0	0
2381-08438	af	Oklahoma	18	0	0	0	0	0	0	0	0	0	0	0	0	0	0	0	0	0	1	0	0	3
2381-08440	af	Oklahoma	18	0	0	0	0	0	0	0	0	0	0	0	0	0	0	0	0	0	1	0	0	0
2381-08441	af	Oklahoma	18	0	0	0	0	0	0	0	0	0	0	0	0	0	0	0	0	0	1	0	0	0
2381-08444	af	Oklahoma	18	0	0	0	0	0	0	0	0	0	0	0	0	0	0	0	0	0	1	0	0	0
2381-08446	af	Oklahoma	18	0	0	0	0	0	0	0	0	0	0	0	0	0	0	0	0	0	1	0	0	0
2381-08448	af	Oklahoma	18	0	0	0	0	0	0	0	0	0	0	0	0	0	0	0	0	0	1	0	0	0
2381-08450	af	Oklahoma	18	0	0	0	0	0	0	0	0	0	0	0	0	0	0	0	0	0	1	0	0	0
2381-08455	af	Oklahoma	18	0	0	0	0	0	0	0	0	0	0	0	0	0	0	0	0	0	1	0	0	0
2381-08456	af	Oklahoma	18	0	0	0	0	0	0	0	0	0	0	0	0	0	0	0	0	0	1	0	0	0
2381-08458	af	Oklahoma	18	0	0	0	0	0	0	0	0	0	0	0	0	0	0	0	0	0	1	0	0	2
2381-08461	af	Oklahoma	18	0	0	0	0	0	0	0	0	0	0	0	0	0	0	0	0	0	1	0	0	0
2381-08463	af	Oklahoma	18	0	0	0	0	0	0	0	0	0	0	0	0	0	0	0	0	0	1	0	0	0
2381-08464	af	Oklahoma	18	0	0	0	0	0	0	0	0	0	0	0	0	0	0	0	0	0	1	0	0	0
2381-08465	af	Oklahoma	18	0	0	0	0	0	0	0	0	0	0	0	0	0	0	0	0	0	1	0	0	2
2381-08466	af	Oklahoma	18	0	0	0	0	0	0	0	0	0	0	0	0	0	0	0	0	0	1	0	0	0
2381-08469	af	Oklahoma	18	0	0	0	0	0	0	0	0	0	0	0	0	0	0	0	0	0	1	0	0	0
2381-08470	af	Oklahoma	18	0	0	0	0	0	0	0	0	0	0	0	0	0	0	0	0	0	1	0	0	0
2381-08472	af	Oklahoma	18	0	0	0	0	0	0	0	0	0	0	0	0	0	0	0	0	0	1	0	0	0
2381-08473	af	Oklahoma	18	0	0	0	0	0	0	0	0	0	0	0	0	0	0	0	0	0	1	0	0	0
2381-08474	af	Oklahoma	18	0	0	0	0	0	0	0	0	0	0	0	0	0	0	0	0	0	1	0	0	0
2381-08475	af	Oklahoma	18	0	0	0	0	0	0	0	0	0	0	0	0	0	0	0	0	0	1	0	0	3
2381-08482	af	Oklahoma	18	0	0	0	0	0	0	0	0	0	0	0	0	0	0	0	0	0	1	0	0	0
2381-08484	af	Oklahoma	18	0	0	0	0	0	0	0	0	0	0	0	0	0	0	0	0	0	1	0	0	0
2381-08485	af	Oklahoma	18	0	0	0	0	0	0	0	0	0	0	0	0	0	0	0	0	0	1	0	0	0
2381-08488	af	Oklahoma	18	0	0	0	0	0	0	0	0	0	0	0	0	0	0	0	0	0	1	0	0	0
2381-08493	af	Oklahoma	18	0	0	0	0	0	0	0	0	0	0	0	0	0	0	0	0	0	1	0	0	2
2381-08497	af	Oklahoma	18	0	0	0	0	0	0	0	0	0	0	0	0	0	0	0	0	0	1	0	0	0
2381-11759	af	Oklahoma	19	0	0	0	0	0	0	0	0	0	0	0	0	0	0	0	0	0	0	1	0	0
2381-11760	af	Oklahoma	19	0	0	0	0	0	0	0	0	0	0	0	0	0	0	0	0	0	0	1	0	0
2318-11795	af	Oklahoma	20	0	0	0	0	0	0	0	0	0	0	0	0	0	0	0	0	0	0	0	1	0
2381-11766	af	Oklahoma	20	0	0	0	0	0	0	0	0	0	0	0	0	0	0	0	0	0	0	0	1	0
2381-11767	af	Oklahoma	20	0	0	0	0	0	0	0	0	0	0	0	0	0	0	0	0	0	0	0	1	0
2381-11768	af	Oklahoma	20	0	0	0	0	0	0	0	0	0	0	0	0	0	0	0	0	0	0	0	1	0
2381-11770	af	Oklahoma	20	0	0	0	0	0	0	0	0	0	0	0	0	0	0	0	0	0	0	0	1	0
2381-11771	af	Oklahoma	20	0	0	0	0	0	0	0	0	0	0	0	0	0	0	0	0	0	0	0	1	0
2381-11772	af	Oklahoma	20	0	0	0	0	0	0	0	0	0	0	0	0	0	0	0	0	0	0	0	1	0
2381-11773	af	Oklahoma	20	0	0	0	0	0	0	0	0	0	0	0	0	0	0	0	0	0	0	0	1	0
2381-11775	af	Oklahoma	20	0	0	0	0	0	0	0	0	0	0	0	0	0	0	0	0	0	0	0	1	0
2381-11776	af	Oklahoma	20	0	0	0	0	0	0	0	0	0	0	0	0	0	0	0	0	0	0	0	1	0
2381-11777	af	Oklahoma	20	0	0	0	0	0	0	0	0	0	0	0	0	0	0	0	0	0	0	0	1	0
2381-11778	af	Oklahoma	20	0	0	0	0	0	0	0	0	0	0	0	0	0	0	0	0	0	0	0	1	0
2381-11779	af	Oklahoma	20	0	0	0	0	0	0	0	0	0	0	0	0	0	0	0	0	0	0	0	1	0
2381-11780	af	Oklahoma	20	0	0	0	0	0	0	0	0	0	0	0	0	0	0	0	0	0	0	0	1	0
2381-11781	af	Oklahoma	20	0	0	0	0	0	0	0	0	0	0	0	0	0	0	0	0	0	0	0	1	2
2381-11782	af	Oklahoma	20	0	0	0	0	0	0	0	0	0	0	0	0	0	0	0	0	0	0	0	1	0
2381-11783	af	Oklahoma	20	0	0	0	0	0	0	0	0	0	0	0	0	0	0	0	0	0	0	0	1	0
2381-11784	af	Oklahoma	20	0	0	0	0	0	0	0	0	0	0	0	0	0	0	0	0	0	0	0	1	0
2381-11787	af	Oklahoma	20	0	0	0	0	0	0	0	0	0	0	0	0	0	0	0	0	0	0	0	1	0
2381-11788	af	Oklahoma	20	0	0	0	0	0	0	0	0	0	0	0	0	0	0	0	0	0	0	0	1	2
2381-11789	af	Oklahoma	20	0	0	0	0	0	0	0	0	0	0	0	0	0	0	0	0	0	0	0	1	0
2381-11790	af	Oklahoma	20	0	0	0	0	0	0	0	0	0	0	0	0	0	0	0	0	0	0	0	1	0
2381-11791	af	Oklahoma	20	0	0	0	0	0	0	0	0	0	0	0	0	0	0	0	0	0	0	0	1	0
2381-11792	af	Oklahoma	20	0	0	0	0	0	0	0	0	0	0	0	0	0	0	0	0	0	0	0	1	0
2381-11793	af	Oklahoma	20	0	0	0	0	0	0	0	0	0	0	0	0	0	0	0	0	0	0	0	1	2
2381-11804	af	Oklahoma	20	0	0	0	0	0	0	0	0	0	0	0	0	0	0	0	0	0	0	0	1	0
2381-11805	af	Oklahoma	20	0	0	0	0	0	0	0	0	0	0	0	0	0	0	0	0	0	0	0	1	2
2381-11806	af	Oklahoma	20	0	0	0	0	0	0	0	0	0	0	0	0	0	0	0	0	0	0	0	1	0
2381-11807	af	Oklahoma	20	0	0	0	0	0	0	0	0	0	0	0	0	0	0	0	0	0	0	0	1	0
2381-11808	af	Oklahoma	20	0	0	0	0	0	0	0	0	0	0	0	0	0	0	0	0	0	0	0	1	0
2381-11811	af	Oklahoma	20	0	0	0	0	0	0	0	0	0	0	0	0	0	0	0	0	0	0	0	1	0
2381-11816	af	Oklahoma	20	0	0	0	0	0	0	0	0	0	0	0	0	0	0	0	0	0	0	0	1	0
2381-11817	af	Oklahoma	20	0	0	0	0	0	0	0	0	0	0	0	0	0	0	0	0	0	0	0	1	2
2381-11819	af	Oklahoma	20	0	0	0	0	0	0	0	0	0	0	0	0	0	0	0	0	0	0	0	1	2
2381-11820	af	Oklahoma	20	0	0	0	0	0	0	0	0	0	0	0	0	0	0	0	0	0	0	0	1	0
2381-11821	af	Oklahoma	20	0	0	0	0	0	0	0	0	0	0	0	0	0	0	0	0	0	0	0	1	2
2381-11822	af	Oklahoma	20	0	0	0	0	0	0	0	0	0	0	0	0	0	0	0	0	0	0	0	1	0
2381-11824	af	Oklahoma	20	0	0	0	0	0	0	0	0	0	0	0	0	0	0	0	0	0	0	0	1	0
2381-11825	af	Oklahoma	20	0	0	0	0	0	0	0	0	0	0	0	0	0	0	0	0	0	0	0	1	0
2381-11827	af	Oklahoma	20	0	0	0	0	0	0	0	0	0	0	0	0	0	0	0	0	0	0	0	1	0
2381-11831	af	Oklahoma	20	0	0	0	0	0	0	0	0	0	0	0	0	0	0	0	0	0	0	0	1	0
2381-11832	af	Oklahoma	20	0	0	0	0	0	0	0	0	0	0	0	0	0	0	0	0	0	0	0	1	0
2381-11834	af	Oklahoma	20	0	0	0	0	0	0	0	0	0	0	0	0	0	0	0	0	0	0	0	1	0
2381-11835	af	Oklahoma	20	0	0	0	0	0	0	0	0	0	0	0	0	0	0	0	0	0	0	0	1	2
2381-11840	af	Oklahoma	20	0	0	0	0	0	0	0	0	0	0	0	0	0	0	0	0	0	0	0	1	0
2381-11841	af	Oklahoma	20	0	0	0	0	0	0	0	0	0	0	0	0	0	0	0	0	0	0	0	1	0
2381-11842	af	Oklahoma	20	0	0	0	0	0	0	0	0	0	0	0	0	0	0	0	0	0	0	0	1	2
2381-11844	af	Oklahoma	20	0	0	0	0	0	0	0	0	0	0	0	0	0	0	0	0	0	0	0	1	2
2381-11845	af	Oklahoma	20	0	0	0	0	0	0	0	0	0	0	0	0	0	0	0	0	0	0	0	1	0
2381-11850	af	Oklahoma	20	0	0	0	0	0	0	0	0	0	0	0	0	0	0	0	0	0	0	0	1	2
2381-11851	af	Oklahoma	20	0	0	0	0	0	0	0	0	0	0	0	0	0	0	0	0	0	0	0	1	0
2381-11853	af	Oklahoma	20	0	0	0	0	0	0	0	0	0	0	0	0	0	0	0	0	0	0	0	1	0
2381-11854	af	Oklahoma	20	0	0	0	0	0	0	0	0	0	0	0	0	0	0	0	0	0	0	0	1	0
2381-11855	af	Oklahoma	20	0	0	0	0	0	0	0	0	0	0	0	0	0	0	0	0	0	0	0	1	0
2381-11860	af	Oklahoma	20	0	0	0	0	0	0	0	0	0	0	0	0	0	0	0	0	0	0	0	1	0
2381-11938	af	Oklahoma	21	0	0	0	0	0	0	0	0	0	0	0	0	0	0	0	0	0	0	0	0	1
2381-11939	af	Oklahoma	21	0	0	0	0	0	0	0	0	0	0	0	0	0	0	0	0	0	0	0	0	1
2381-11940	af	Oklahoma	21	0	0	0	0	0	0	0	0	0	0	0	0	0	0	0	0	0	0	0	0	1
2381-11941	af	Oklahoma	21	0	0	0	0	0	0	0	0	0	0	0	0	0	0	0	0	0	0	0	0	1
2381-11942	af	Oklahoma	21	0	0	0	0	0	0	0	0	0	0	0	0	0	0	0	0	0	0	0	0	1
2381-11943	af	Oklahoma	21	0	0	0	0	0	0	0	0	0	0	0	0	0	0	0	0	0	0	0	0	1
2381-11944	af	Oklahoma	21	0	0	0	0	0	0	0	0	0	0	0	0	0	0	0	0	0	0	0	0	1
2381-11946	af	Oklahoma	21	0	0	0	0	0	0	0	0	0	0	0	0	0	0	0	0	0	0	0	0	1
2381-11948	af	Oklahoma	21	0	0	0	0	0	0	0	0	0	0	0	0	0	0	0	0	0	0	0	0	1
2381-11953	af	Oklahoma	21	0	0	0	0	0	0	0	0	0	0	0	0	0	0	0	0	0	0	0	0	1
2381-11955	af	Oklahoma	21	0	0	0	0	0	0	0	0	0	0	0	0	0	0	0	0	0	0	0	0	1
2381-11956	af	Oklahoma	21	0	0	0	0	0	0	0	0	0	0	0	0	0	0	0	0	0	0	0	0	1
2381-11957	af	Oklahoma	21	0	0	0	0	0	0	0	0	0	0	0	0	0	0	0	0	0	0	0	0	1
2381-11958	af	Oklahoma	21	0	0	0	0	0	0	0	0	0	0	0	0	0	0	0	0	0	0	0	0	1
2381-11960	af	Oklahoma	21	0	0	0	0	0	0	0	0	0	0	0	0	0	0	0	0	0	0	0	0	1
2381-11966	af	Oklahoma	21	0	0	0	0	0	0	0	0	0	0	0	0	0	0	0	0	0	0	0	0	1
2381-11967	af	Oklahoma	21	0	0	0	0	0	0	0	0	0	0	0	0	0	0	0	0	0	0	0	0	1
2381-11968	af	Oklahoma	21	0	0	0	0	0	0	0	0	0	0	0	0	0	0	0	0	0	0	0	0	1
2381-11969	af	Oklahoma	21	0	0	0	0	0	0	0	0	0	0	0	0	0	0	0	0	0	0	0	0	1
2381-11972	af	Oklahoma	21	0	0	0	0	0	0	0	0	0	0	0	0	0	0	0	0	0	0	0	0	1
2381-11973	af	Oklahoma	21	0	0	0	0	0	0	0	0	0	0	0	0	0	0	0	0	0	0	0	0	1
2381-11974	af	Oklahoma	21	0	0	0	0	0	0	0	0	0	0	0	0	0	0	0	0	0	0	0	0	1
2381-11975	af	Oklahoma	21	0	0	0	0	0	0	0	0	0	0	0	0	0	0	0	0	0	0	0	0	1
2381-11977	af	Oklahoma	21	0	0	0	0	0	0	0	0	0	0	0	0	0	0	0	0	0	0	0	0	1
2381-11981	af	Oklahoma	21	0	0	0	0	0	0	0	0	0	0	0	0	0	0	0	0	0	0	0	0	1
2381-11987	af	Oklahoma	21	0	0	0	0	0	0	0	0	0	0	0	0	0	0	0	0	0	0	0	0	1
2381-11988	af	Oklahoma	21	0	0	0	0	0	0	0	0	0	0	0	0	0	0	0	0	0	0	0	0	1
2381-11991	af	Oklahoma	21	0	0	0	0	0	0	0	0	0	0	0	0	0	0	0	0	0	0	0	0	1
2381-11994	af	Oklahoma	21	0	0	0	0	0	0	0	0	0	0	0	0	0	0	0	0	0	0	0	0	1
2381-11995	af	Oklahoma	21	0	0	0	0	0	0	0	0	0	0	0	0	0	0	0	0	0	0	0	0	1
2381-11996	af	Oklahoma	21	0	0	0	0	0	0	0	0	0	0	0	0	0	0	0	0	0	0	0	0	1
2381-11997	af	Oklahoma	21	0	0	0	0	0	0	0	0	0	0	0	0	0	0	0	0	0	0	0	0	1
2381-12000	af	Oklahoma	21	0	0	0	0	0	0	0	0	0	0	0	0	0	0	0	0	0	0	0	0	1
2851-00902	af	Oklahoma	21	0	0	0	0	0	0	0	0	0	0	0	0	0	0	0	0	0	0	0	0	1
2851-00903	af	Oklahoma	21	0	0	0	0	0	0	0	0	0	0	0	0	0	0	0	0	0	0	0	0	1
2851-00906	af	Oklahoma	21	0	0	0	0	0	0	0	0	0	0	0	0	0	0	0	0	0	0	0	0	1
2851-00907	af	Oklahoma	21	0	0	0	0	0	0	0	0	0	0	0	0	0	0	0	0	0	0	0	0	1
2851-00913	af	Oklahoma	21	0	0	0	0	0	0	0	0	0	0	0	0	0	0	0	0	0	0	0	0	1
2851-00916	af	Oklahoma	21	0	0	0	0	0	0	0	0	0	0	0	0	0	0	0	0	0	0	0	0	1
2851-00924	af	Oklahoma	21	0	0	0	0	0	0	0	0	0	0	0	0	0	0	0	0	0	0	0	0	1
2851-00928	af	Oklahoma	21	0	0	0	0	0	0	0	0	0	0	0	0	0	0	0	0	0	0	0	0	1
2851-00929	af	Oklahoma	21	0	0	0	0	0	0	0	0	0	0	0	0	0	0	0	0	0	0	0	0	1
2851-00945	af	Oklahoma	21	0	0	0	0	0	0	0	0	0	0	0	0	0	0	0	0	0	0	0	0	1
2381-00491	am	Oklahoma	16	0	0	0	0	0	0	0	0	0	0	0	0	0	0	0	1	0	0	0	0	0
2381-00532	am	Oklahoma	16	0	0	0	0	0	0	0	0	0	0	0	0	0	0	0	1	0	0	0	0	0
2381-00533	am	Oklahoma	16	0	0	0	0	0	0	0	0	0	0	0	0	0	0	0	1	0	0	0	0	0
2381-00603	am	Oklahoma	16	0	0	0	0	0	0	0	0	0	0	0	0	0	0	0	1	0	0	0	0	1
2381-00618	am	Oklahoma	16	0	0	0	0	0	0	0	0	0	0	0	0	0	0	0	1	0	0	0	0	0
2381-00644	am	Oklahoma	16	0	0	0	0	0	0	0	0	0	0	0	0	0	0	0	1	0	0	0	0	0
2381-00649	am	Oklahoma	16	0	0	0	0	0	0	0	0	0	0	0	0	0	0	0	1	0	0	0	0	0
2381-00650	am	Oklahoma	16	0	0	0	0	0	0	0	0	0	0	0	0	0	0	0	1	0	0	0	0	0
2381-00651	am	Oklahoma	16	0	0	0	0	0	0	0	0	0	0	0	0	0	0	0	1	0	0	0	0	0
2381-00653	am	Oklahoma	16	0	0	0	0	0	0	0	0	0	0	0	0	0	0	0	1	0	0	0	0	0
2381-00661	am	Oklahoma	16	0	0	0	0	0	0	0	0	0	0	0	0	0	0	0	1	0	0	0	0	0
2381-00665	am	Oklahoma	16	0	0	0	0	0	0	0	0	0	0	0	0	0	0	0	1	0	0	0	0	0
2381-00673	am	Oklahoma	16	0	0	0	0	0	0	0	0	0	0	0	0	0	0	0	1	0	0	0	0	0
2381-00677	am	Oklahoma	16	0	0	0	0	0	0	0	0	0	0	0	0	0	0	0	1	0	0	0	0	0
2381-00693	am	Oklahoma	16	0	0	0	0	0	0	0	0	0	0	0	0	0	0	0	1	0	0	0	0	0
2381-00696	am	Oklahoma	16	0	0	0	0	0	0	0	0	0	0	0	0	0	0	0	1	0	0	0	0	0
2381-00576	am	Oklahoma	17	0	0	0	0	0	0	0	0	0	0	0	0	0	0	0	0	1	0	0	1	0
2381-00583	am	Oklahoma	17	0	0	0	0	0	0	0	0	0	0	0	0	0	0	0	0	1	0	0	0	0
2381-00595	am	Oklahoma	17	0	0	0	0	0	0	0	0	0	0	0	0	0	0	0	0	1	0	0	0	0
2381-00596	am	Oklahoma	17	0	0	0	0	0	0	0	0	0	0	0	0	0	0	0	0	1	0	0	0	0
2381-00600	am	Oklahoma	17	0	0	0	0	0	0	0	0	0	0	0	0	0	0	0	0	1	0	0	0	0
2381-08209	am	Oklahoma	17	0	0	0	0	0	0	0	0	0	0	0	0	0	0	0	0	1	0	0	0	0
2381-08210	am	Oklahoma	17	0	0	0	0	0	0	0	0	0	0	0	0	0	0	0	0	1	0	0	0	0
2381-08215	am	Oklahoma	17	0	0	0	0	0	0	0	0	0	0	0	0	0	0	0	0	1	0	0	0	0
2381-08217	am	Oklahoma	17	0	0	0	0	0	0	0	0	0	0	0	0	0	0	0	0	1	0	0	0	0
2381-08218	am	Oklahoma	17	0	0	0	0	0	0	0	0	0	0	0	0	0	0	0	0	1	0	0	0	0
2381-08219	am	Oklahoma	17	0	0	0	0	0	0	0	0	0	0	0	0	0	0	0	0	1	0	0	0	0
2381-08225	am	Oklahoma	17	0	0	0	0	0	0	0	0	0	0	0	0	0	0	0	0	1	0	0	0	0
2381-08227	am	Oklahoma	17	0	0	0	0	0	0	0	0	0	0	0	0	0	0	0	0	1	0	0	0	0
2381-08231	am	Oklahoma	17	0	0	0	0	0	0	0	0	0	0	0	0	0	0	0	0	1	0	0	0	0
2381-08232	am	Oklahoma	17	0	0	0	0	0	0	0	0	0	0	0	0	0	0	0	0	1	0	0	0	0
2381-08235	am	Oklahoma	17	0	0	0	0	0	0	0	0	0	0	0	0	0	0	0	0	1	0	0	0	0
2381-08243	am	Oklahoma	17	0	0	0	0	0	0	0	0	0	0	0	0	0	0	0	0	1	0	0	0	0
2381-08249	am	Oklahoma	17	0	0	0	0	0	0	0	0	0	0	0	0	0	0	0	0	1	0	0	0	0
2381-08260	am	Oklahoma	17	0	0	0	0	0	0	0	0	0	0	0	0	0	0	0	0	1	0	0	0	0
2381-08276	am	Oklahoma	17	0	0	0	0	0	0	0	0	0	0	0	0	0	0	0	0	1	0	0	0	2
2381-08284	am	Oklahoma	17	0	0	0	0	0	0	0	0	0	0	0	0	0	0	0	0	1	0	0	0	0
2381-08290	am	Oklahoma	17	0	0	0	0	0	0	0	0	0	0	0	0	0	0	0	0	1	0	0	0	0
2381-08300	am	Oklahoma	17	0	0	0	0	0	0	0	0	0	0	0	0	0	0	0	0	1	0	0	0	2
2381-08402	am	Oklahoma	17	0	0	0	0	0	0	0	0	0	0	0	0	0	0	0	0	1	0	0	0	0
2381-08413	am	Oklahoma	17	0	0	0	0	0	0	0	0	0	0	0	0	0	0	0	0	1	0	0	0	0
2381-08415	am	Oklahoma	17	0	0	0	0	0	0	0	0	0	0	0	0	0	0	0	0	1	0	0	0	0
2381-08424	am	Oklahoma	17	0	0	0	0	0	0	0	0	0	0	0	0	0	0	0	0	1	0	0	0	0
2381-08337	am	Oklahoma	18	0	0	0	0	0	0	0	0	0	0	0	0	0	0	0	0	0	1	0	0	0
2381-08344	am	Oklahoma	18	0	0	0	0	0	0	0	0	0	0	0	0	0	0	0	0	0	1	0	0	0
2381-08346	am	Oklahoma	18	0	0	0	0	0	0	0	0	0	0	0	0	0	0	0	0	0	1	0	0	0
2381-08354	am	Oklahoma	18	0	0	0	0	0	0	0	0	0	0	0	0	0	0	0	0	0	1	0	0	0
2381-08355	am	Oklahoma	18	0	0	0	0	0	0	0	0	0	0	0	0	0	0	0	0	0	1	0	0	0
2381-08364	am	Oklahoma	18	0	0	0	0	0	0	0	0	0	0	0	0	0	0	0	0	0	1	0	0	2
2381-08365	am	Oklahoma	18	0	0	0	0	0	0	0	0	0	0	0	0	0	0	0	0	0	1	0	0	0
2381-08367	am	Oklahoma	18	0	0	0	0	0	0	0	0	0	0	0	0	0	0	0	0	0	1	0	0	0
2381-08429	am	Oklahoma	18	0	0	0	0	0	0	0	0	0	0	0	0	0	0	0	0	0	1	0	0	0
2381-08431	am	Oklahoma	18	0	0	0	0	0	0	0	0	0	0	0	0	0	0	0	0	0	1	0	0	0
2381-08433	am	Oklahoma	18	0	0	0	0	0	0	0	0	0	0	0	0	0	0	0	0	0	1	0	0	0
2381-08437	am	Oklahoma	18	0	0	0	0	0	0	0	0	0	0	0	0	0	0	0	0	0	1	0	0	0
2381-08439	am	Oklahoma	18	0	0	0	0	0	0	0	0	0	0	0	0	0	0	0	0	0	1	0	0	0
2381-08442	am	Oklahoma	18	0	0	0	0	0	0	0	0	0	0	0	0	0	0	0	0	0	1	0	0	0
2381-08443	am	Oklahoma	18	0	0	0	0	0	0	0	0	0	0	0	0	0	0	0	0	0	1	0	0	2
2381-08445	am	Oklahoma	18	0	0	0	0	0	0	0	0	0	0	0	0	0	0	0	0	0	1	0	0	0
2381-08447	am	Oklahoma	18	0	0	0	0	0	0	0	0	0	0	0	0	0	0	0	0	0	1	0	0	0
2381-08449	am	Oklahoma	18	0	0	0	0	0	0	0	0	0	0	0	0	0	0	0	0	0	1	0	0	0
2381-08451	am	Oklahoma	18	0	0	0	0	0	0	0	0	0	0	0	0	0	0	0	0	0	1	0	0	0
2381-08454	am	Oklahoma	18	0	0	0	0	0	0	0	0	0	0	0	0	0	0	0	0	0	1	0	0	0
2381-08457	am	Oklahoma	18	0	0	0	0	0	0	0	0	0	0	0	0	0	0	0	0	0	1	0	0	0
2381-08459	am	Oklahoma	18	0	0	0	0	0	0	0	0	0	0	0	0	0	0	0	0	0	1	0	0	0
2381-08460	am	Oklahoma	18	0	0	0	0	0	0	0	0	0	0	0	0	0	0	0	0	0	1	0	0	2
2381-08462	am	Oklahoma	18	0	0	0	0	0	0	0	0	0	0	0	0	0	0	0	0	0	1	0	0	2
2381-08467	am	Oklahoma	18	0	0	0	0	0	0	0	0	0	0	0	0	0	0	0	0	0	1	0	0	0
2381-08468	am	Oklahoma	18	0	0	0	0	0	0	0	0	0	0	0	0	0	0	0	0	0	1	0	0	0
2381-08481	am	Oklahoma	18	0	0	0	0	0	0	0	0	0	0	0	0	0	0	0	0	0	1	0	0	0
2381-08483	am	Oklahoma	18	0	0	0	0	0	0	0	0	0	0	0	0	0	0	0	0	0	1	0	0	0
2381-08490	am	Oklahoma	18	0	0	0	0	0	0	0	0	0	0	0	0	0	0	0	0	0	1	0	0	0
2381-08494	am	Oklahoma	18	0	0	0	0	0	0	0	0	0	0	0	0	0	0	0	0	0	1	0	0	0
2381-08495	am	Oklahoma	18	0	0	0	0	0	0	0	0	0	0	0	0	0	0	0	0	0	1	0	0	0
2381-08496	am	Oklahoma	18	0	0	0	0	0	0	0	0	0	0	0	0	0	0	0	0	0	1	0	0	0
2381-11730	am	Oklahoma	19	0	0	0	0	0	0	0	0	0	0	0	0	0	0	0	0	0	0	1	0	0
2381-11769	am	Oklahoma	20	0	0	0	0	0	0	0	0	0	0	0	0	0	0	0	0	0	0	0	1	0
2381-11774	am	Oklahoma	20	0	0	0	0	0	0	0	0	0	0	0	0	0	0	0	0	0	0	0	1	2
2381-11785	am	Oklahoma	20	0	0	0	0	0	0	0	0	0	0	0	0	0	0	0	0	0	0	0	1	0
2381-11786	am	Oklahoma	20	0	0	0	0	0	0	0	0	0	0	0	0	0	0	0	0	0	0	0	1	0
2381-11794	am	Oklahoma	20	0	0	0	0	0	0	0	0	0	0	0	0	0	0	0	0	0	0	0	1	0
2381-11797	am	Oklahoma	20	0	0	0	0	0	0	0	0	0	0	0	0	0	0	0	0	0	0	0	1	0
2381-11818	am	Oklahoma	20	0	0	0	0	0	0	0	0	0	0	0	0	0	0	0	0	0	0	0	1	0
2381-11826	am	Oklahoma	20	0	0	0	0	0	0	0	0	0	0	0	0	0	0	0	0	0	0	0	1	0
2381-11828	am	Oklahoma	20	0	0	0	0	0	0	0	0	0	0	0	0	0	0	0	0	0	0	0	1	0
2381-11829	am	Oklahoma	20	0	0	0	0	0	0	0	0	0	0	0	0	0	0	0	0	0	0	0	1	0
2381-11830	am	Oklahoma	20	0	0	0	0	0	0	0	0	0	0	0	0	0	0	0	0	0	0	0	1	0
2381-11833	am	Oklahoma	20	0	0	0	0	0	0	0	0	0	0	0	0	0	0	0	0	0	0	0	1	0
2381-11836	am	Oklahoma	20	0	0	0	0	0	0	0	0	0	0	0	0	0	0	0	0	0	0	0	1	2
2381-11843	am	Oklahoma	20	0	0	0	0	0	0	0	0	0	0	0	0	0	0	0	0	0	0	0	1	0
2381-11945	am	Oklahoma	21	0	0	0	0	0	0	0	0	0	0	0	0	0	0	0	0	0	0	0	0	1
2381-11947	am	Oklahoma	21	0	0	0	0	0	0	0	0	0	0	0	0	0	0	0	0	0	0	0	0	1
2381-11951	am	Oklahoma	21	0	0	0	0	0	0	0	0	0	0	0	0	0	0	0	0	0	0	0	0	1
2381-11952	am	Oklahoma	21	0	0	0	0	0	0	0	0	0	0	0	0	0	0	0	0	0	0	0	0	1
2381-11959	am	Oklahoma	21	0	0	0	0	0	0	0	0	0	0	0	0	0	0	0	0	0	0	0	0	1
2381-11980	am	Oklahoma	21	0	0	0	0	0	0	0	0	0	0	0	0	0	0	0	0	0	0	0	0	1
2381-11998	am	Oklahoma	21	0	0	0	0	0	0	0	0	0	0	0	0	0	0	0	0	0	0	0	0	1
2851-00917	am	Oklahoma	21	0	0	0	0	0	0	0	0	0	0	0	0	0	0	0	0	0	0	0	0	1
2851-00922	am	Oklahoma	21	0	0	0	0	0	0	0	0	0	0	0	0	0	0	0	0	0	0	0	0	1
2851-00923	am	Oklahoma	21	0	0	0	0	0	0	0	0	0	0	0	0	0	0	0	0	0	0	0	0	1
2851-00940	am	Oklahoma	21	0	0	0	0	0	0	0	0	0	0	0	0	0	0	0	0	0	0	0	0	1
2381-00639	jf	Oklahoma	16	0	0	0	0	0	0	0	0	0	0	0	0	0	0	0	1	0	0	0	0	0
2381-00641	jf	Oklahoma	16	0	0	0	0	0	0	0	0	0	0	0	0	0	0	0	1	0	0	0	0	0
2381-00645	jf	Oklahoma	16	0	0	0	0	0	0	0	0	0	0	0	0	0	0	0	1	0	0	0	0	0
2381-00647	jf	Oklahoma	16	0	0	0	0	0	0	0	0	0	0	0	0	0	0	0	1	0	0	0	0	0
2381-00656	jf	Oklahoma	16	0	0	0	0	0	0	0	0	0	0	0	0	0	0	0	1	0	0	0	0	0
2381-00662	jf	Oklahoma	16	0	0	0	0	0	0	0	0	0	0	0	0	0	0	0	1	0	0	0	0	0
2381-00670	jf	Oklahoma	16	0	0	0	0	0	0	0	0	0	0	0	0	0	0	0	1	0	0	0	0	0
2381-00671	jf	Oklahoma	16	0	0	0	0	0	0	0	0	0	0	0	0	0	0	0	1	0	0	0	0	0
2381-00672	jf	Oklahoma	16	0	0	0	0	0	0	0	0	0	0	0	0	0	0	0	1	0	0	0	0	0
2381-00680	jf	Oklahoma	16	0	0	0	0	0	0	0	0	0	0	0	0	0	0	0	1	0	0	0	0	0
2381-00685	jf	Oklahoma	16	0	0	0	0	0	0	0	0	0	0	0	0	0	0	0	1	0	0	0	0	0
2381-00686	jf	Oklahoma	16	0	0	0	0	0	0	0	0	0	0	0	0	0	0	0	1	0	0	0	0	0
2381-00689	jf	Oklahoma	16	0	0	0	0	0	0	0	0	0	0	0	0	0	0	0	1	0	0	0	0	0
2381-00690	jf	Oklahoma	16	0	0	0	0	0	0	0	0	0	0	0	0	0	0	0	1	0	0	0	0	0
2381-00691	jf	Oklahoma	16	0	0	0	0	0	0	0	0	0	0	0	0	0	0	0	1	0	0	0	0	0
2381-00692	jf	Oklahoma	16	0	0	0	0	0	0	0	0	0	0	0	0	0	0	0	1	0	0	0	0	0
2381-00698	jf	Oklahoma	16	0	0	0	0	0	0	0	0	0	0	0	0	0	0	0	1	0	0	0	0	0
2381-00581	jf	Oklahoma	17	0	0	0	0	0	0	0	0	0	0	0	0	0	0	0	0	1	0	0	0	0
2381-00587	jf	Oklahoma	17	0	0	0	0	0	0	0	0	0	0	0	0	0	0	0	0	1	0	0	0	0
2381-00591	jf	Oklahoma	17	0	0	0	0	0	0	0	0	0	0	0	0	0	0	0	0	1	0	0	0	0
2381-00593	jf	Oklahoma	17	0	0	0	0	0	0	0	0	0	0	0	0	0	0	0	0	1	0	0	0	0
2381-08202	jf	Oklahoma	17	0	0	0	0	0	0	0	0	0	0	0	0	0	0	0	0	1	0	0	0	0
2381-08203	jf	Oklahoma	17	0	0	0	0	0	0	0	0	0	0	0	0	0	0	0	0	1	0	0	0	0
2381-08213	jf	Oklahoma	17	0	0	0	0	0	0	0	0	0	0	0	0	0	0	0	0	1	0	0	0	0
2381-08214	jf	Oklahoma	17	0	0	0	0	0	0	0	0	0	0	0	0	0	0	0	0	1	0	0	0	0
2381-08216	jf	Oklahoma	17	0	0	0	0	0	0	0	0	0	0	0	0	0	0	0	0	1	0	0	0	0
2381-08241	jf	Oklahoma	17	0	0	0	0	0	0	0	0	0	0	0	0	0	0	0	0	1	0	0	0	0
2381-08242	jf	Oklahoma	17	0	0	0	0	0	0	0	0	0	0	0	0	0	0	0	0	1	0	0	0	0
2381-08244	jf	Oklahoma	17	0	0	0	0	0	0	0	0	0	0	0	0	0	0	0	0	1	0	0	0	0
2381-08248	jf	Oklahoma	17	0	0	0	0	0	0	0	0	0	0	0	0	0	0	0	0	1	0	0	0	0
2381-08251	jf	Oklahoma	17	0	0	0	0	0	0	0	0	0	0	0	0	0	0	0	0	1	0	0	0	0
2381-08254	jf	Oklahoma	17	0	0	0	0	0	0	0	0	0	0	0	0	0	0	0	0	1	0	0	0	0
2381-08255	jf	Oklahoma	17	0	0	0	0	0	0	0	0	0	0	0	0	0	0	0	0	1	0	0	0	0
2381-08293	jf	Oklahoma	17	0	0	0	0	0	0	0	0	0	0	0	0	0	0	0	0	1	0	0	0	0
2381-08294	jf	Oklahoma	17	0	0	0	0	0	0	0	0	0	0	0	0	0	0	0	0	1	0	0	0	0
2381-08406	jf	Oklahoma	17	0	0	0	0	0	0	0	0	0	0	0	0	0	0	0	0	1	0	0	0	0
2381-08410	jf	Oklahoma	17	0	0	0	0	0	0	0	0	0	0	0	0	0	0	0	0	1	0	0	0	0
2381-08411	jf	Oklahoma	17	0	0	0	0	0	0	0	0	0	0	0	0	0	0	0	0	1	0	0	0	0
2381-08417	jf	Oklahoma	17	0	0	0	0	0	0	0	0	0	0	0	0	0	0	0	0	1	0	0	0	0
2381-08423	jf	Oklahoma	17	0	0	0	0	0	0	0	0	0	0	0	0	0	0	0	0	1	0	0	0	0
2381-08369	jf	Oklahoma	18	0	0	0	0	0	0	0	0	0	0	0	0	0	0	0	0	0	1	0	0	0
2381-11721	jf	Oklahoma	19	0	0	0	0	0	0	0	0	0	0	0	0	0	0	0	0	0	0	1	0	0
2381-11722	jf	Oklahoma	19	0	0	0	0	0	0	0	0	0	0	0	0	0	0	0	0	0	0	1	0	0
2381-11725	jf	Oklahoma	19	0	0	0	0	0	0	0	0	0	0	0	0	0	0	0	0	0	0	1	0	0
2381-11728	jf	Oklahoma	19	0	0	0	0	0	0	0	0	0	0	0	0	0	0	0	0	0	0	1	0	0
2381-11729	jf	Oklahoma	19	0	0	0	0	0	0	0	0	0	0	0	0	0	0	0	0	0	0	1	0	0
2381-11731	jf	Oklahoma	19	0	0	0	0	0	0	0	0	0	0	0	0	0	0	0	0	0	0	1	0	0
2381-11732	jf	Oklahoma	19	0	0	0	0	0	0	0	0	0	0	0	0	0	0	0	0	0	0	1	0	0
2381-11733	jf	Oklahoma	19	0	0	0	0	0	0	0	0	0	0	0	0	0	0	0	0	0	0	1	0	0
2381-11734	jf	Oklahoma	19	0	0	0	0	0	0	0	0	0	0	0	0	0	0	0	0	0	0	1	0	0
2381-11738	jf	Oklahoma	19	0	0	0	0	0	0	0	0	0	0	0	0	0	0	0	0	0	0	1	0	0
2381-11740	jf	Oklahoma	19	0	0	0	0	0	0	0	0	0	0	0	0	0	0	0	0	0	0	1	0	0
2381-11741	jf	Oklahoma	19	0	0	0	0	0	0	0	0	0	0	0	0	0	0	0	0	0	0	1	0	0
2381-11742	jf	Oklahoma	19	0	0	0	0	0	0	0	0	0	0	0	0	0	0	0	0	0	0	1	0	0
2381-11744	jf	Oklahoma	19	0	0	0	0	0	0	0	0	0	0	0	0	0	0	0	0	0	0	1	0	0
2381-11746	jf	Oklahoma	19	0	0	0	0	0	0	0	0	0	0	0	0	0	0	0	0	0	0	1	0	0
2381-11747	jf	Oklahoma	19	0	0	0	0	0	0	0	0	0	0	0	0	0	0	0	0	0	0	1	0	0
2381-11750	jf	Oklahoma	19	0	0	0	0	0	0	0	0	0	0	0	0	0	0	0	0	0	0	1	0	0
2381-11751	jf	Oklahoma	19	0	0	0	0	0	0	0	0	0	0	0	0	0	0	0	0	0	0	1	0	0
2381-11755	jf	Oklahoma	19	0	0	0	0	0	0	0	0	0	0	0	0	0	0	0	0	0	0	1	0	0
2381-11757	jf	Oklahoma	19	0	0	0	0	0	0	0	0	0	0	0	0	0	0	0	0	0	0	1	0	0
2381-11758	jf	Oklahoma	19	0	0	0	0	0	0	0	0	0	0	0	0	0	0	0	0	0	0	1	0	0
2381-11801	jf	Oklahoma	20	0	0	0	0	0	0	0	0	0	0	0	0	0	0	0	0	0	0	0	1	0
2381-11809	jf	Oklahoma	20	0	0	0	0	0	0	0	0	0	0	0	0	0	0	0	0	0	0	0	1	0
2381-11812	jf	Oklahoma	20	0	0	0	0	0	0	0	0	0	0	0	0	0	0	0	0	0	0	0	1	0
2381-11813	jf	Oklahoma	20	0	0	0	0	0	0	0	0	0	0	0	0	0	0	0	0	0	0	0	1	0
2381-11823	jf	Oklahoma	20	0	0	0	0	0	0	0	0	0	0	0	0	0	0	0	0	0	0	0	1	0
2381-11864	jf	Oklahoma	20	0	0	0	0	0	0	0	0	0	0	0	0	0	0	0	0	0	0	0	1	0
2381-11865	jf	Oklahoma	20	0	0	0	0	0	0	0	0	0	0	0	0	0	0	0	0	0	0	0	1	0
2381-11954	jf	Oklahoma	21	0	0	0	0	0	0	0	0	0	0	0	0	0	0	0	0	0	0	0	0	1
2381-11961	jf	Oklahoma	21	0	0	0	0	0	0	0	0	0	0	0	0	0	0	0	0	0	0	0	0	1
2381-11962	jf	Oklahoma	21	0	0	0	0	0	0	0	0	0	0	0	0	0	0	0	0	0	0	0	0	1
2381-11963	jf	Oklahoma	21	0	0	0	0	0	0	0	0	0	0	0	0	0	0	0	0	0	0	0	0	1
2381-11965	jf	Oklahoma	21	0	0	0	0	0	0	0	0	0	0	0	0	0	0	0	0	0	0	0	0	1
2381-11970	jf	Oklahoma	21	0	0	0	0	0	0	0	0	0	0	0	0	0	0	0	0	0	0	0	0	1
2381-11978	jf	Oklahoma	21	0	0	0	0	0	0	0	0	0	0	0	0	0	0	0	0	0	0	0	0	1
2381-11982	jf	Oklahoma	21	0	0	0	0	0	0	0	0	0	0	0	0	0	0	0	0	0	0	0	0	1
2381-11984	jf	Oklahoma	21	0	0	0	0	0	0	0	0	0	0	0	0	0	0	0	0	0	0	0	0	1
2381-11993	jf	Oklahoma	21	0	0	0	0	0	0	0	0	0	0	0	0	0	0	0	0	0	0	0	0	1
2851-00918	jf	Oklahoma	21	0	0	0	0	0	0	0	0	0	0	0	0	0	0	0	0	0	0	0	0	1
2851-00919	jf	Oklahoma	21	0	0	0	0	0	0	0	0	0	0	0	0	0	0	0	0	0	0	0	0	1
2851-00920	jf	Oklahoma	21	0	0	0	0	0	0	0	0	0	0	0	0	0	0	0	0	0	0	0	0	1
2851-00921	jf	Oklahoma	21	0	0	0	0	0	0	0	0	0	0	0	0	0	0	0	0	0	0	0	0	1
2851-00926	jf	Oklahoma	21	0	0	0	0	0	0	0	0	0	0	0	0	0	0	0	0	0	0	0	0	1
2851-00938	jf	Oklahoma	21	0	0	0	0	0	0	0	0	0	0	0	0	0	0	0	0	0	0	0	0	1
2851-00941	jf	Oklahoma	21	0	0	0	0	0	0	0	0	0	0	0	0	0	0	0	0	0	0	0	0	1
2851-00942	jf	Oklahoma	21	0	0	0	0	0	0	0	0	0	0	0	0	0	0	0	0	0	0	0	0	1
2851-00944	jf	Oklahoma	21	0	0	0	0	0	0	0	0	0	0	0	0	0	0	0	0	0	0	0	0	1
2851-00947	jf	Oklahoma	21	0	0	0	0	0	0	0	0	0	0	0	0	0	0	0	0	0	0	0	0	1
2851-00950	jf	Oklahoma	21	0	0	0	0	0	0	0	0	0	0	0	0	0	0	0	0	0	0	0	0	1
2851-00951	jf	Oklahoma	21	0	0	0	0	0	0	0	0	0	0	0	0	0	0	0	0	0	0	0	0	1
2381-00640	jm	Oklahoma	16	0	0	0	0	0	0	0	0	0	0	0	0	0	0	0	1	0	0	0	0	0
2381-00646	jm	Oklahoma	16	0	0	0	0	0	0	0	0	0	0	0	0	0	0	0	1	0	0	0	0	0
2381-00648	jm	Oklahoma	16	0	0	0	0	0	0	0	0	0	0	0	0	0	0	0	1	0	0	0	0	0
2381-00652	jm	Oklahoma	16	0	0	0	0	0	0	0	0	0	0	0	0	0	0	0	1	0	0	0	0	0
2381-00654	jm	Oklahoma	16	0	0	0	0	0	0	0	0	0	0	0	0	0	0	0	1	0	0	0	0	0
2381-00657	jm	Oklahoma	16	0	0	0	0	0	0	0	0	0	0	0	0	0	0	0	1	0	0	0	0	0
2381-00658	jm	Oklahoma	16	0	0	0	0	0	0	0	0	0	0	0	0	0	0	0	1	0	0	0	0	0
2381-00667	jm	Oklahoma	16	0	0	0	0	0	0	0	0	0	0	0	0	0	0	0	1	0	0	0	0	0
2381-00676	jm	Oklahoma	16	0	0	0	0	0	0	0	0	0	0	0	0	0	0	0	1	0	0	0	0	0
2381-00594	jm	Oklahoma	17	0	0	0	0	0	0	0	0	0	0	0	0	0	0	0	0	1	0	0	0	0
2381-08238	jm	Oklahoma	17	0	0	0	0	0	0	0	0	0	0	0	0	0	0	0	0	1	0	0	0	0
2381-08253	jm	Oklahoma	17	0	0	0	0	0	0	0	0	0	0	0	0	0	0	0	0	1	0	0	0	0
2381-08257	jm	Oklahoma	17	0	0	0	0	0	0	0	0	0	0	0	0	0	0	0	0	1	0	0	0	0
2381-08279	jm	Oklahoma	17	0	0	0	0	0	0	0	0	0	0	0	0	0	0	0	0	1	0	0	0	0
2381-08281	jm	Oklahoma	17	0	0	0	0	0	0	0	0	0	0	0	0	0	0	0	0	1	0	0	0	0
2381-08403	jm	Oklahoma	17	0	0	0	0	0	0	0	0	0	0	0	0	0	0	0	0	1	0	0	0	0
2381-08422	jm	Oklahoma	17	0	0	0	0	0	0	0	0	0	0	0	0	0	0	0	0	1	0	0	0	0
2381-08339	jm	Oklahoma	18	0	0	0	0	0	0	0	0	0	0	0	0	0	0	0	0	0	1	0	0	0
2381-08340	jm	Oklahoma	18	0	0	0	0	0	0	0	0	0	0	0	0	0	0	0	0	0	1	0	0	0
2381-08341	jm	Oklahoma	18	0	0	0	0	0	0	0	0	0	0	0	0	0	0	0	0	0	1	0	0	0
2381-08343	jm	Oklahoma	18	0	0	0	0	0	0	0	0	0	0	0	0	0	0	0	0	0	1	0	0	0
2381-08348	jm	Oklahoma	18	0	0	0	0	0	0	0	0	0	0	0	0	0	0	0	0	0	1	0	0	0
2381-08374	jm	Oklahoma	18	0	0	0	0	0	0	0	0	0	0	0	0	0	0	0	0	0	1	0	0	0
2381-08377	jm	Oklahoma	18	0	0	0	0	0	0	0	0	0	0	0	0	0	0	0	0	0	1	0	0	0
2381-08378	jm	Oklahoma	18	0	0	0	0	0	0	0	0	0	0	0	0	0	0	0	0	0	1	0	0	0
2381-08452	jm	Oklahoma	18	0	0	0	0	0	0	0	0	0	0	0	0	0	0	0	0	0	1	0	0	0
2381-08453	jm	Oklahoma	18	0	0	0	0	0	0	0	0	0	0	0	0	0	0	0	0	0	1	0	0	0
2381-08491	jm	Oklahoma	18	0	0	0	0	0	0	0	0	0	0	0	0	0	0	0	0	0	1	0	0	0
2381-08498	jm	Oklahoma	18	0	0	0	0	0	0	0	0	0	0	0	0	0	0	0	0	0	1	0	0	0
2381-08499	jm	Oklahoma	18	0	0	0	0	0	0	0	0	0	0	0	0	0	0	0	0	0	1	0	0	0
2381-08500	jm	Oklahoma	18	0	0	0	0	0	0	0	0	0	0	0	0	0	0	0	0	0	1	0	0	0
2381-11723	jm	Oklahoma	19	0	0	0	0	0	0	0	0	0	0	0	0	0	0	0	0	0	0	1	0	0
2381-11724	jm	Oklahoma	19	0	0	0	0	0	0	0	0	0	0	0	0	0	0	0	0	0	0	1	0	0
2381-11726	jm	Oklahoma	19	0	0	0	0	0	0	0	0	0	0	0	0	0	0	0	0	0	0	1	0	0
2381-11727	jm	Oklahoma	19	0	0	0	0	0	0	0	0	0	0	0	0	0	0	0	0	0	0	1	0	0
2381-11735	jm	Oklahoma	19	0	0	0	0	0	0	0	0	0	0	0	0	0	0	0	0	0	0	1	0	0
2381-11736	jm	Oklahoma	19	0	0	0	0	0	0	0	0	0	0	0	0	0	0	0	0	0	0	1	0	0
2381-11737	jm	Oklahoma	19	0	0	0	0	0	0	0	0	0	0	0	0	0	0	0	0	0	0	1	0	0
2381-11739	jm	Oklahoma	19	0	0	0	0	0	0	0	0	0	0	0	0	0	0	0	0	0	0	1	0	0
2381-11743	jm	Oklahoma	19	0	0	0	0	0	0	0	0	0	0	0	0	0	0	0	0	0	0	1	0	0
2381-11745	jm	Oklahoma	19	0	0	0	0	0	0	0	0	0	0	0	0	0	0	0	0	0	0	1	0	0
2381-11748	jm	Oklahoma	19	0	0	0	0	0	0	0	0	0	0	0	0	0	0	0	0	0	0	1	0	0
2381-11749	jm	Oklahoma	19	0	0	0	0	0	0	0	0	0	0	0	0	0	0	0	0	0	0	1	0	0
2381-11752	jm	Oklahoma	19	0	0	0	0	0	0	0	0	0	0	0	0	0	0	0	0	0	0	1	0	0
2381-11753	jm	Oklahoma	19	0	0	0	0	0	0	0	0	0	0	0	0	0	0	0	0	0	0	1	0	0
2381-11754	jm	Oklahoma	19	0	0	0	0	0	0	0	0	0	0	0	0	0	0	0	0	0	0	1	0	0
2381-11756	jm	Oklahoma	19	0	0	0	0	0	0	0	0	0	0	0	0	0	0	0	0	0	0	1	0	0
2381-11761	jm	Oklahoma	19	0	0	0	0	0	0	0	0	0	0	0	0	0	0	0	0	0	0	1	0	0
2381-11799	jm	Oklahoma	20	0	0	0	0	0	0	0	0	0	0	0	0	0	0	0	0	0	0	0	1	0
2381-11800	jm	Oklahoma	20	0	0	0	0	0	0	0	0	0	0	0	0	0	0	0	0	0	0	0	1	2
2381-11802	jm	Oklahoma	20	0	0	0	0	0	0	0	0	0	0	0	0	0	0	0	0	0	0	0	1	0
2381-11814	jm	Oklahoma	20	0	0	0	0	0	0	0	0	0	0	0	0	0	0	0	0	0	0	0	1	0
2381-11838	jm	Oklahoma	20	0	0	0	0	0	0	0	0	0	0	0	0	0	0	0	0	0	0	0	1	0
2381-11839	jm	Oklahoma	20	0	0	0	0	0	0	0	0	0	0	0	0	0	0	0	0	0	0	0	1	0
2381-11847	jm	Oklahoma	20	0	0	0	0	0	0	0	0	0	0	0	0	0	0	0	0	0	0	0	1	0
2381-11861	jm	Oklahoma	20	0	0	0	0	0	0	0	0	0	0	0	0	0	0	0	0	0	0	0	1	0
2381-11862	jm	Oklahoma	20	0	0	0	0	0	0	0	0	0	0	0	0	0	0	0	0	0	0	0	1	0
2381-11866	jm	Oklahoma	20	0	0	0	0	0	0	0	0	0	0	0	0	0	0	0	0	0	0	0	1	0
2381-11867	jm	Oklahoma	20	0	0	0	0	0	0	0	0	0	0	0	0	0	0	0	0	0	0	0	1	0
2381-11949	jm	Oklahoma	21	0	0	0	0	0	0	0	0	0	0	0	0	0	0	0	0	0	0	0	0	1
2381-11950	jm	Oklahoma	21	0	0	0	0	0	0	0	0	0	0	0	0	0	0	0	0	0	0	0	0	1
2381-11964	jm	Oklahoma	21	0	0	0	0	0	0	0	0	0	0	0	0	0	0	0	0	0	0	0	0	1
2381-11976	jm	Oklahoma	21	0	0	0	0	0	0	0	0	0	0	0	0	0	0	0	0	0	0	0	0	1
2381-11979	jm	Oklahoma	21	0	0	0	0	0	0	0	0	0	0	0	0	0	0	0	0	0	0	0	0	1
2381-11983	jm	Oklahoma	21	0	0	0	0	0	0	0	0	0	0	0	0	0	0	0	0	0	0	0	0	1
2381-11985	jm	Oklahoma	21	0	0	0	0	0	0	0	0	0	0	0	0	0	0	0	0	0	0	0	0	1
2381-11989	jm	Oklahoma	21	0	0	0	0	0	0	0	0	0	0	0	0	0	0	0	0	0	0	0	0	1
2381-11990	jm	Oklahoma	21	0	0	0	0	0	0	0	0	0	0	0	0	0	0	0	0	0	0	0	0	1
2381-11992	jm	Oklahoma	21	0	0	0	0	0	0	0	0	0	0	0	0	0	0	0	0	0	0	0	0	1
2381-11999	jm	Oklahoma	21	0	0	0	0	0	0	0	0	0	0	0	0	0	0	0	0	0	0	0	0	1
2851-00904	jm	Oklahoma	21	0	0	0	0	0	0	0	0	0	0	0	0	0	0	0	0	0	0	0	0	1
2851-00905	jm	Oklahoma	21	0	0	0	0	0	0	0	0	0	0	0	0	0	0	0	0	0	0	0	0	1
2851-00908	jm	Oklahoma	21	0	0	0	0	0	0	0	0	0	0	0	0	0	0	0	0	0	0	0	0	1
2851-00909	jm	Oklahoma	21	0	0	0	0	0	0	0	0	0	0	0	0	0	0	0	0	0	0	0	0	1
2851-00910	jm	Oklahoma	21	0	0	0	0	0	0	0	0	0	0	0	0	0	0	0	0	0	0	0	0	1
2851-00911	jm	Oklahoma	21	0	0	0	0	0	0	0	0	0	0	0	0	0	0	0	0	0	0	0	0	1
2851-00912	jm	Oklahoma	21	0	0	0	0	0	0	0	0	0	0	0	0	0	0	0	0	0	0	0	0	1
2851-00914	jm	Oklahoma	21	0	0	0	0	0	0	0	0	0	0	0	0	0	0	0	0	0	0	0	0	1
2851-00925	jm	Oklahoma	21	0	0	0	0	0	0	0	0	0	0	0	0	0	0	0	0	0	0	0	0	1
2851-00927	jm	Oklahoma	21	0	0	0	0	0	0	0	0	0	0	0	0	0	0	0	0	0	0	0	0	1
2851-00930	jm	Oklahoma	21	0	0	0	0	0	0	0	0	0	0	0	0	0	0	0	0	0	0	0	0	1
2851-00931	jm	Oklahoma	21	0	0	0	0	0	0	0	0	0	0	0	0	0	0	0	0	0	0	0	0	1
2851-00935	jm	Oklahoma	21	0	0	0	0	0	0	0	0	0	0	0	0	0	0	0	0	0	0	0	0	1
2851-00936	jm	Oklahoma	21	0	0	0	0	0	0	0	0	0	0	0	0	0	0	0	0	0	0	0	0	1
2851-00939	jm	Oklahoma	21	0	0	0	0	0	0	0	0	0	0	0	0	0	0	0	0	0	0	0	0	1
2851-00943	jm	Oklahoma	21	0	0	0	0	0	0	0	0	0	0	0	0	0	0	0	0	0	0	0	0	1
2851-00946	jm	Oklahoma	21	0	0	0	0	0	0	0	0	0	0	0	0	0	0	0	0	0	0	0	0	1
2851-00948	jm	Oklahoma	21	0	0	0	0	0	0	0	0	0	0	0	0	0	0	0	0	0	0	0	0	1
2851-00952	jm	Oklahoma	21	0	0	0	0	0	0	0	0	0	0	0	0	0	0	0	0	0	0	0	0	1
2381-00606	ju	Oklahoma	16	0	0	0	0	0	0	0	0	0	0	0	0	0	0	0	1	0	0	0	0	0
2381-00607	ju	Oklahoma	16	0	0	0	0	0	0	0	0	0	0	0	0	0	0	0	1	0	0	0	0	0
2381-00608	ju	Oklahoma	16	0	0	0	0	0	0	0	0	0	0	0	0	0	0	0	1	0	0	0	0	0
2381-00609	ju	Oklahoma	16	0	0	0	0	0	0	0	0	0	0	0	0	0	0	0	1	0	0	0	0	0
2381-00610	ju	Oklahoma	16	0	0	0	0	0	0	0	0	0	0	0	0	0	0	0	1	0	0	0	0	0
2381-00611	ju	Oklahoma	16	0	0	0	0	0	0	0	0	0	0	0	0	0	0	0	1	0	0	0	0	0
2381-00612	ju	Oklahoma	16	0	0	0	0	0	0	0	0	0	0	0	0	0	0	0	1	0	0	0	0	0
2381-00613	ju	Oklahoma	16	0	0	0	0	0	0	0	0	0	0	0	0	0	0	0	1	0	0	0	0	0
2381-00614	ju	Oklahoma	16	0	0	0	0	0	0	0	0	0	0	0	0	0	0	0	1	0	0	0	0	0
2381-00620	ju	Oklahoma	16	0	0	0	0	0	0	0	0	0	0	0	0	0	0	0	1	0	0	0	0	0
2381-00621	ju	Oklahoma	16	0	0	0	0	0	0	0	0	0	0	0	0	0	0	0	1	0	0	0	0	0
2381-00622	ju	Oklahoma	16	0	0	0	0	0	0	0	0	0	0	0	0	0	0	0	1	0	0	0	0	0
2381-00623	ju	Oklahoma	16	0	0	0	0	0	0	0	0	0	0	0	0	0	0	0	1	0	0	0	0	0
2381-00624	ju	Oklahoma	16	0	0	0	0	0	0	0	0	0	0	0	0	0	0	0	1	0	0	0	0	0
2381-00625	ju	Oklahoma	16	0	0	0	0	0	0	0	0	0	0	0	0	0	0	0	1	0	0	0	0	0
2381-00626	ju	Oklahoma	16	0	0	0	0	0	0	0	0	0	0	0	0	0	0	0	1	0	0	0	0	0
2381-00627	ju	Oklahoma	16	0	0	0	0	0	0	0	0	0	0	0	0	0	0	0	1	0	0	0	0	0
2381-00628	ju	Oklahoma	16	0	0	0	0	0	0	0	0	0	0	0	0	0	0	0	1	0	0	0	0	0
2381-00629	ju	Oklahoma	16	0	0	0	0	0	0	0	0	0	0	0	0	0	0	0	1	0	0	0	0	0
2381-00630	ju	Oklahoma	16	0	0	0	0	0	0	0	0	0	0	0	0	0	0	0	1	0	0	0	0	0
2381-00631	ju	Oklahoma	16	0	0	0	0	0	0	0	0	0	0	0	0	0	0	0	1	0	0	0	0	0
2381-00632	ju	Oklahoma	16	0	0	0	0	0	0	0	0	0	0	0	0	0	0	0	1	0	0	0	0	0
2381-00633	ju	Oklahoma	16	0	0	0	0	0	0	0	0	0	0	0	0	0	0	0	1	0	0	0	0	0
2381-00636	ju	Oklahoma	16	0	0	0	0	0	0	0	0	0	0	0	0	0	0	0	1	0	0	0	0	0
2381-00637	ju	Oklahoma	16	0	0	0	0	0	0	0	0	0	0	0	0	0	0	0	1	0	0	0	0	0
2381-00638	ju	Oklahoma	16	0	0	0	0	0	0	0	0	0	0	0	0	0	0	0	1	0	0	0	0	0
2381-00666	ju	Oklahoma	16	0	0	0	0	0	0	0	0	0	0	0	0	0	0	0	1	0	0	0	0	0
2381-00668	ju	Oklahoma	16	0	0	0	0	0	0	0	0	0	0	0	0	0	0	0	1	0	0	0	0	0
2381-00674	ju	Oklahoma	16	0	0	0	0	0	0	0	0	0	0	0	0	0	0	0	1	0	0	0	0	0
2381-00675	ju	Oklahoma	16	0	0	0	0	0	0	0	0	0	0	0	0	0	0	0	1	0	0	0	0	0
2381-00679	ju	Oklahoma	16	0	0	0	0	0	0	0	0	0	0	0	0	0	0	0	1	0	0	0	0	0
2381-00681	ju	Oklahoma	16	0	0	0	0	0	0	0	0	0	0	0	0	0	0	0	1	0	0	0	0	0
2381-00683	ju	Oklahoma	16	0	0	0	0	0	0	0	0	0	0	0	0	0	0	0	1	0	0	0	0	0
2381-00688	ju	Oklahoma	16	0	0	0	0	0	0	0	0	0	0	0	0	0	0	0	1	0	0	0	0	0
2381-00599	ju	Oklahoma	17	0	0	0	0	0	0	0	0	0	0	0	0	0	0	0	0	1	0	0	0	0
2381-08204	ju	Oklahoma	17	0	0	0	0	0	0	0	0	0	0	0	0	0	0	0	0	1	0	0	0	0
2381-08205	ju	Oklahoma	17	0	0	0	0	0	0	0	0	0	0	0	0	0	0	0	0	1	0	0	0	0
2381-08206	ju	Oklahoma	17	0	0	0	0	0	0	0	0	0	0	0	0	0	0	0	0	1	0	0	0	0
2381-08211	ju	Oklahoma	17	0	0	0	0	0	0	0	0	0	0	0	0	0	0	0	0	1	0	0	0	0
2381-08212	ju	Oklahoma	17	0	0	0	0	0	0	0	0	0	0	0	0	0	0	0	0	1	0	0	0	0
2381-08239	ju	Oklahoma	17	0	0	0	0	0	0	0	0	0	0	0	0	0	0	0	0	1	0	0	0	0
2381-08245	ju	Oklahoma	17	0	0	0	0	0	0	0	0	0	0	0	0	0	0	0	0	1	0	0	0	0
2381-08246	ju	Oklahoma	17	0	0	0	0	0	0	0	0	0	0	0	0	0	0	0	0	1	0	0	0	0
2381-08252	ju	Oklahoma	17	0	0	0	0	0	0	0	0	0	0	0	0	0	0	0	0	1	0	0	0	0
2381-08258	ju	Oklahoma	17	0	0	0	0	0	0	0	0	0	0	0	0	0	0	0	0	1	0	0	0	0
2381-08259	ju	Oklahoma	17	0	0	0	0	0	0	0	0	0	0	0	0	0	0	0	0	1	0	0	0	0
2381-08272	ju	Oklahoma	17	0	0	0	0	0	0	0	0	0	0	0	0	0	0	0	0	1	0	0	0	0
2381-08295	ju	Oklahoma	17	0	0	0	0	0	0	0	0	0	0	0	0	0	0	0	0	1	0	0	0	0
2381-08296	ju	Oklahoma	17	0	0	0	0	0	0	0	0	0	0	0	0	0	0	0	0	1	0	0	0	0
2381-08425	ju	Oklahoma	17	0	0	0	0	0	0	0	0	0	0	0	0	0	0	0	0	1	0	0	0	0
2381-08426	ju	Oklahoma	17	0	0	0	0	0	0	0	0	0	0	0	0	0	0	0	0	1	0	0	0	0
2381-08428	ju	Oklahoma	17	0	0	0	0	0	0	0	0	0	0	0	0	0	0	0	0	1	0	0	0	0
2381-08338	ju	Oklahoma	18	0	0	0	0	0	0	0	0	0	0	0	0	0	0	0	0	0	1	0	0	0
2381-08342	ju	Oklahoma	18	0	0	0	0	0	0	0	0	0	0	0	0	0	0	0	0	0	1	0	0	0
2381-08345	ju	Oklahoma	18	0	0	0	0	0	0	0	0	0	0	0	0	0	0	0	0	0	1	0	0	0
2381-08356	ju	Oklahoma	18	0	0	0	0	0	0	0	0	0	0	0	0	0	0	0	0	0	1	0	0	0
2381-08357	ju	Oklahoma	18	0	0	0	0	0	0	0	0	0	0	0	0	0	0	0	0	0	1	0	0	0
2381-08358	ju	Oklahoma	18	0	0	0	0	0	0	0	0	0	0	0	0	0	0	0	0	0	1	0	0	0
2381-08366	ju	Oklahoma	18	0	0	0	0	0	0	0	0	0	0	0	0	0	0	0	0	0	1	0	0	0
2381-08368	ju	Oklahoma	18	0	0	0	0	0	0	0	0	0	0	0	0	0	0	0	0	0	1	0	0	0
2381-08370	ju	Oklahoma	18	0	0	0	0	0	0	0	0	0	0	0	0	0	0	0	0	0	1	0	0	0
2381-08371	ju	Oklahoma	18	0	0	0	0	0	0	0	0	0	0	0	0	0	0	0	0	0	1	0	0	0
2381-08373	ju	Oklahoma	18	0	0	0	0	0	0	0	0	0	0	0	0	0	0	0	0	0	1	0	0	0
2381-08375	ju	Oklahoma	18	0	0	0	0	0	0	0	0	0	0	0	0	0	0	0	0	0	1	0	0	0
2381-08376	ju	Oklahoma	18	0	0	0	0	0	0	0	0	0	0	0	0	0	0	0	0	0	1	0	0	0
2381-08379	ju	Oklahoma	18	0	0	0	0	0	0	0	0	0	0	0	0	0	0	0	0	0	1	0	0	0
2381-08380	ju	Oklahoma	18	0	0	0	0	0	0	0	0	0	0	0	0	0	0	0	0	0	1	0	0	0
2381-08381	ju	Oklahoma	18	0	0	0	0	0	0	0	0	0	0	0	0	0	0	0	0	0	1	0	0	0
2381-08471	ju	Oklahoma	18	0	0	0	0	0	0	0	0	0	0	0	0	0	0	0	0	0	1	0	0	0
2381-08476	ju	Oklahoma	18	0	0	0	0	0	0	0	0	0	0	0	0	0	0	0	0	0	1	0	0	0
2381-08477	ju	Oklahoma	18	0	0	0	0	0	0	0	0	0	0	0	0	0	0	0	0	0	1	0	0	0
2381-08478	ju	Oklahoma	18	0	0	0	0	0	0	0	0	0	0	0	0	0	0	0	0	0	1	0	0	0
2381-08479	ju	Oklahoma	18	0	0	0	0	0	0	0	0	0	0	0	0	0	0	0	0	0	1	0	0	0
2381-08480	ju	Oklahoma	18	0	0	0	0	0	0	0	0	0	0	0	0	0	0	0	0	0	1	0	0	0
2381-08486	ju	Oklahoma	18	0	0	0	0	0	0	0	0	0	0	0	0	0	0	0	0	0	1	0	0	0
2381-08487	ju	Oklahoma	18	0	0	0	0	0	0	0	0	0	0	0	0	0	0	0	0	0	1	0	0	0
2381-08489	ju	Oklahoma	18	0	0	0	0	0	0	0	0	0	0	0	0	0	0	0	0	0	1	0	0	0
2381-08492	ju	Oklahoma	18	0	0	0	0	0	0	0	0	0	0	0	0	0	0	0	0	0	1	0	0	0
2381-11798	ju	Oklahoma	20	0	0	0	0	0	0	0	0	0	0	0	0	0	0	0	0	0	0	0	1	0
2381-11803	ju	Oklahoma	20	0	0	0	0	0	0	0	0	0	0	0	0	0	0	0	0	0	0	0	1	0
2381-11810	ju	Oklahoma	20	0	0	0	0	0	0	0	0	0	0	0	0	0	0	0	0	0	0	0	1	0
2381-11815	ju	Oklahoma	20	0	0	0	0	0	0	0	0	0	0	0	0	0	0	0	0	0	0	0	1	0
2381-11837	ju	Oklahoma	20	0	0	0	0	0	0	0	0	0	0	0	0	0	0	0	0	0	0	0	1	0
2381-11846	ju	Oklahoma	20	0	0	0	0	0	0	0	0	0	0	0	0	0	0	0	0	0	0	0	1	0
2381-11848	ju	Oklahoma	20	0	0	0	0	0	0	0	0	0	0	0	0	0	0	0	0	0	0	0	1	0
2381-11849	ju	Oklahoma	20	0	0	0	0	0	0	0	0	0	0	0	0	0	0	0	0	0	0	0	1	0
2381-11852	ju	Oklahoma	20	0	0	0	0	0	0	0	0	0	0	0	0	0	0	0	0	0	0	0	1	0
2381-11856	ju	Oklahoma	20	0	0	0	0	0	0	0	0	0	0	0	0	0	0	0	0	0	0	0	1	0
2381-11857	ju	Oklahoma	20	0	0	0	0	0	0	0	0	0	0	0	0	0	0	0	0	0	0	0	1	0
2381-11858	ju	Oklahoma	20	0	0	0	0	0	0	0	0	0	0	0	0	0	0	0	0	0	0	0	1	0
2381-11859	ju	Oklahoma	20	0	0	0	0	0	0	0	0	0	0	0	0	0	0	0	0	0	0	0	1	0
2381-11863	ju	Oklahoma	20	0	0	0	0	0	0	0	0	0	0	0	0	0	0	0	0	0	0	0	1	0
2381-11971	ju	Oklahoma	21	0	0	0	0	0	0	0	0	0	0	0	0	0	0	0	0	0	0	0	0	1
2381-11986	ju	Oklahoma	21	0	0	0	0	0	0	0	0	0	0	0	0	0	0	0	0	0	0	0	0	1
2851-00915	ju	Oklahoma	21	0	0	0	0	0	0	0	0	0	0	0	0	0	0	0	0	0	0	0	0	1
2851-00932	ju	Oklahoma	21	0	0	0	0	0	0	0	0	0	0	0	0	0	0	0	0	0	0	0	0	1
2851-00933	ju	Oklahoma	21	0	0	0	0	0	0	0	0	0	0	0	0	0	0	0	0	0	0	0	0	1
2851-00934	ju	Oklahoma	21	0	0	0	0	0	0	0	0	0	0	0	0	0	0	0	0	0	0	0	0	1
2851-00937	ju	Oklahoma	21	0	0	0	0	0	0	0	0	0	0	0	0	0	0	0	0	0	0	0	0	1
2851-00949	ju	Oklahoma	21	0	0	0	0	0	0	0	0	0	0	0	0	0	0	0	0	0	0	0	0	1
8021-13068	af	Texas	2	0	1	0	0	0	0	0	0	0	0	0	1	0	0	0	0	0	0	0	0	0
802113001	af	Texas	2	0	1	0	0	0	0	0	0	0	0	0	0	0	0	0	0	0	0	0	0	0
802113007	af	Texas	2	0	1	2	0	0	0	0	0	0	0	0	0	0	0	0	0	0	0	0	0	0
802113008	af	Texas	2	0	1	2	0	0	0	0	0	0	0	0	0	0	0	0	0	0	0	0	0	0
802113009	af	Texas	2	0	1	2	0	0	0	0	0	0	0	0	0	0	0	0	0	0	0	0	0	0
802113010	af	Texas	2	0	1	2	0	0	0	0	0	0	0	0	0	0	0	0	0	0	0	0	0	0
802113012	af	Texas	2	0	1	2	0	0	0	0	0	0	0	0	0	0	0	0	0	0	0	0	0	0
802113016	af	Texas	2	0	1	2	0	0	0	0	0	0	0	0	0	0	0	0	0	0	0	0	0	0
802113018	af	Texas	2	0	1	2	0	0	0	0	0	0	0	0	0	0	0	0	0	0	0	0	0	0
802113020	af	Texas	2	0	1	0	0	0	0	0	0	0	0	0	0	0	0	0	0	0	0	0	0	0
802113021	af	Texas	2	0	1	2	0	0	0	0	0	0	0	0	0	0	0	0	0	0	0	0	0	0
802113022	af	Texas	2	0	1	2	0	0	0	0	0	0	0	0	0	0	0	0	0	0	0	0	0	0
802113030	af	Texas	2	0	1	2	0	0	0	0	0	0	0	0	0	0	0	0	0	0	0	0	0	0
802113031	af	Texas	2	0	1	0	0	0	0	0	0	0	0	0	0	0	0	0	0	0	0	0	0	0
802113032	af	Texas	2	0	1	2	0	0	0	0	0	0	0	0	0	0	0	0	0	0	0	0	0	0
802113035	af	Texas	2	0	1	2	0	0	0	0	0	0	0	0	0	0	0	0	0	0	0	0	0	0
802113036	af	Texas	2	0	1	0	0	0	0	0	0	0	0	0	0	0	0	0	0	0	0	0	0	0
802113041	af	Texas	2	0	1	2	0	0	0	0	0	0	0	0	0	0	0	0	0	0	0	0	0	0
802113042	af	Texas	2	0	1	2	0	0	0	0	0	0	0	0	0	0	0	0	0	0	0	0	0	0
802113049	af	Texas	2	0	1	2	0	0	0	0	0	0	0	0	0	0	0	0	0	0	0	0	0	0
802113051	af	Texas	2	0	1	2	0	0	0	0	0	0	0	0	0	0	0	0	0	0	0	0	0	0
802113053	af	Texas	2	0	1	2	0	0	0	0	0	0	0	0	0	0	0	0	0	0	0	0	0	0
802113054	af	Texas	2	0	1	2	0	0	0	0	0	0	0	0	0	0	0	0	0	0	0	0	0	0
802113055	af	Texas	2	0	1	2	0	0	0	0	0	0	0	0	0	0	0	0	0	0	0	0	0	0
802113057	af	Texas	2	0	1	2	0	0	0	0	0	0	0	0	0	0	0	0	0	0	0	0	0	0
802113058	af	Texas	2	0	1	2	0	0	0	0	0	0	0	0	0	0	0	0	0	0	0	0	0	0
802113060	af	Texas	2	0	1	2	0	0	0	0	0	0	0	0	0	0	0	0	0	0	0	0	0	0
802113061	af	Texas	2	0	1	2	0	0	0	0	0	0	0	0	0	0	0	0	0	0	0	0	0	0
802113062	af	Texas	2	0	1	2	0	0	0	0	0	0	0	0	0	0	0	0	0	0	0	0	0	0
802113068	af	Texas	2	0	1	2	0	0	0	0	0	0	0	0	0	2	0	0	0	0	0	0	0	0
802113084	af	Texas	2	0	1	0	0	0	0	0	0	0	0	0	0	0	0	0	0	0	0	0	0	0
802113085	af	Texas	2	0	1	2	0	0	0	0	0	0	0	0	0	0	0	0	0	0	0	0	0	0
802113088	af	Texas	2	0	1	2	0	0	0	0	0	0	0	0	0	0	0	0	0	0	0	0	0	0
802113089	af	Texas	2	0	1	0	0	0	0	0	0	0	0	0	0	0	0	0	0	0	0	0	0	0
802113090	af	Texas	2	0	1	0	0	0	0	0	0	0	0	0	0	0	0	0	0	0	0	0	0	0
802113092	af	Texas	2	0	1	2	0	0	0	0	0	0	0	0	0	0	0	0	0	0	0	0	0	0
802113093	af	Texas	2	0	1	2	0	0	0	0	0	0	0	0	0	0	0	0	0	0	0	0	0	0
802113094	af	Texas	2	0	1	2	0	0	0	0	0	0	0	0	0	0	0	0	0	0	0	0	0	0
802113096	af	Texas	2	0	1	2	0	0	0	0	0	0	0	0	0	0	0	0	0	0	0	0	0	0
802113097	af	Texas	2	0	1	2	0	0	0	0	0	0	0	0	0	0	0	0	0	0	0	0	0	0
802113099	af	Texas	2	0	1	0	0	0	0	0	0	0	0	0	0	0	0	0	0	0	0	0	0	0
802113104	af	Texas	2	0	1	2	0	0	0	0	0	0	0	0	0	0	0	0	0	0	0	0	0	0
802113105	af	Texas	2	0	1	2	0	0	0	0	0	0	0	0	0	0	0	0	0	0	0	0	0	0
802113107	af	Texas	2	0	1	2	0	0	0	0	0	0	0	0	0	0	0	0	0	0	0	0	0	0
802113108	af	Texas	2	0	1	2	0	0	0	0	0	0	0	0	0	0	0	0	0	0	0	0	0	0
802113110	af	Texas	2	0	1	2	0	0	0	0	0	0	0	0	0	0	0	0	0	0	0	0	0	0
802113112	af	Texas	2	0	1	2	0	0	0	0	0	0	0	0	0	0	0	0	0	0	0	0	0	0
802113114	af	Texas	2	0	1	2	0	0	0	0	0	0	0	0	0	0	0	0	0	0	0	0	0	0
802113117	af	Texas	2	0	1	0	0	0	0	0	0	0	0	0	0	0	0	0	0	0	0	0	0	0
802113118	af	Texas	2	0	1	2	0	0	0	0	0	0	0	0	0	0	0	0	0	0	0	0	0	0
802113119	af	Texas	2	0	1	2	0	0	0	0	0	0	0	0	0	0	0	0	0	0	0	0	0	0
802113120	af	Texas	2	0	1	0	0	0	0	0	0	0	0	0	0	0	0	0	0	0	0	0	0	0
802113122	af	Texas	2	0	1	2	0	0	0	0	0	0	0	0	0	0	0	0	0	0	0	0	0	0
802113124	af	Texas	2	0	1	0	0	0	0	0	0	0	0	0	0	0	0	0	0	0	0	0	0	0
802113125	af	Texas	2	0	1	2	0	0	0	0	0	0	0	0	0	0	0	0	0	0	0	0	0	0
802113126	af	Texas	2	0	1	0	0	0	0	0	0	0	0	0	0	0	0	0	0	0	0	0	0	0
802113148	af	Texas	2	0	1	0	0	0	0	0	0	0	0	0	0	0	0	0	0	0	0	0	0	0
802113150	af	Texas	2	0	1	0	0	0	0	0	0	0	0	0	0	0	0	0	0	0	0	0	0	0
802113159	af	Texas	2	0	1	0	0	0	0	0	0	0	0	0	0	0	0	0	0	0	0	0	0	0
802113163	af	Texas	2	0	1	2	0	0	0	0	0	0	0	0	0	0	0	0	0	0	0	0	0	0
802113164	af	Texas	2	0	1	0	0	0	0	0	0	0	0	0	0	0	0	0	0	0	0	0	0	0
802113165	af	Texas	2	0	1	0	0	0	0	0	0	0	0	0	0	0	0	0	0	0	0	0	0	0
802113171	af	Texas	2	0	1	2	0	0	0	0	0	0	0	0	0	0	0	0	0	0	0	0	0	0
802113173	af	Texas	2	0	1	2	0	0	0	0	0	0	0	0	0	0	0	0	0	0	0	0	0	0
802113176	af	Texas	2	0	1	0	0	0	0	0	0	0	0	0	0	0	0	0	0	0	0	0	0	0
802113200	af	Texas	2	0	1	2	0	0	0	0	0	0	0	0	0	0	0	0	0	0	0	0	0	0
802113211	af	Texas	3	0	0	1	0	0	0	0	0	0	0	0	0	0	0	0	0	0	0	0	0	0
802113213	af	Texas	3	0	0	1	0	0	0	0	0	0	0	0	0	0	0	0	0	0	0	0	0	0
802113215	af	Texas	3	0	0	1	0	0	0	0	0	0	0	0	0	0	0	0	0	0	0	0	0	0
802113217	af	Texas	3	0	0	1	0	0	0	0	0	0	0	0	0	0	0	0	0	0	0	0	0	0
802113219	af	Texas	3	0	0	1	0	0	0	0	0	0	0	0	0	0	0	0	0	0	0	0	0	0
802113224	af	Texas	3	0	0	1	0	0	0	0	0	0	0	0	0	0	0	0	0	0	0	0	0	0
802113225	af	Texas	3	0	0	1	0	0	0	0	0	0	0	0	0	0	0	0	0	0	0	0	0	0
802113227	af	Texas	3	0	0	1	0	0	0	0	0	0	0	0	0	0	0	0	0	0	0	0	0	0
802113270	af	Texas	3	0	0	1	0	0	0	0	0	0	0	0	0	0	0	0	0	0	0	0	0	0
802113271	af	Texas	3	0	0	1	0	0	0	0	0	0	0	0	0	0	0	0	0	0	0	0	0	0
802113273	af	Texas	3	0	0	1	0	0	0	0	0	0	0	0	0	0	0	0	0	0	0	0	0	0
802113282	af	Texas	3	0	0	1	0	0	0	0	0	0	0	0	0	0	0	0	0	0	0	0	0	0
802113283	af	Texas	3	0	0	1	0	0	0	0	0	0	0	0	0	0	0	0	0	0	0	0	0	0
802113284	af	Texas	3	0	0	1	0	0	0	0	0	0	0	0	0	0	0	0	0	0	0	0	0	0
802113307	af	Texas	3	0	0	1	0	0	0	0	0	0	0	0	0	0	0	0	0	0	0	0	0	0
802113322	af	Texas	3	0	0	1	0	0	0	0	0	0	0	0	0	0	0	0	0	0	0	0	0	0
2381-00301	af	Texas	11	0	0	0	0	0	0	0	0	0	0	1	0	0	0	0	0	0	0	0	0	0
2381-00302	af	Texas	11	0	0	0	0	0	0	0	0	0	0	1	1	2	0	0	0	0	0	0	0	0
2381-00303	af	Texas	11	0	0	0	0	0	0	0	0	0	0	1	0	0	0	0	0	0	0	0	0	0
2381-00304	af	Texas	11	0	0	0	0	0	0	0	0	0	0	1	2	2	0	0	0	0	0	0	0	0
2381-00305	af	Texas	11	0	0	0	0	0	0	0	0	0	0	1	0	2	0	0	0	0	0	0	0	0
2381-00307	af	Texas	11	0	0	0	0	0	0	0	0	0	0	1	2	2	0	0	0	0	0	0	0	0
2381-00312	af	Texas	11	0	0	0	0	0	0	0	0	0	0	1	0	0	0	0	0	0	0	0	0	0
2381-00314	af	Texas	11	0	0	0	0	0	0	0	0	0	0	1	0	0	0	0	0	0	0	0	0	0
2381-00321	af	Texas	11	0	0	0	0	0	0	0	0	0	0	1	0	0	0	0	0	0	0	0	0	0
2381-00322	af	Texas	11	0	0	0	0	0	0	0	0	0	0	1	2	0	0	0	0	0	0	0	0	0
2381-00325	af	Texas	11	0	0	0	0	0	0	0	0	0	0	1	2	0	0	0	0	0	0	0	0	0
2381-00326	af	Texas	11	0	0	0	0	0	0	0	0	0	0	1	0	0	0	0	0	0	0	0	0	0
2381-00328	af	Texas	11	0	0	0	0	0	0	0	0	0	0	1	0	0	0	0	0	0	0	0	0	0
2381-00331	af	Texas	11	0	0	0	0	0	0	0	0	0	0	1	0	0	0	0	0	0	0	0	0	0
2381-00332	af	Texas	11	0	0	0	0	0	0	0	0	0	0	1	2	0	0	0	0	0	0	0	0	0
2381-00339	af	Texas	11	0	0	0	0	0	0	0	0	0	0	1	2	0	0	0	0	0	0	0	0	0
2381-00340	af	Texas	11	0	0	0	0	0	0	0	0	0	0	1	2	0	0	0	0	0	0	0	0	0
2381-00341	af	Texas	11	0	0	0	0	0	0	0	0	0	0	1	0	2	0	0	0	0	0	0	0	0
2381-00342	af	Texas	11	0	0	0	0	0	0	0	0	0	0	1	0	0	0	0	0	0	0	0	0	0
2381-00343	af	Texas	11	0	0	0	0	0	0	0	0	0	0	1	2	2	0	0	0	0	0	0	0	0
2381-00344	af	Texas	11	0	0	0	0	0	0	0	0	0	0	1	0	0	0	0	0	0	0	0	0	0
2381-00347	af	Texas	11	0	0	0	0	0	0	0	0	0	0	1	0	0	0	0	0	0	0	0	0	0
2381-00349	af	Texas	11	0	0	0	0	0	0	0	0	0	0	1	0	0	0	0	0	0	0	0	0	0
2381-00357	af	Texas	11	0	0	0	0	0	0	0	0	0	0	1	3	0	0	0	0	0	0	0	0	0
2381-00361	af	Texas	11	0	0	0	0	0	0	0	0	0	0	1	0	0	0	0	0	0	0	0	0	0
2381-00366	af	Texas	11	0	0	0	0	0	0	0	0	0	0	1	2	0	0	0	0	0	0	0	0	0
2381-00367	af	Texas	11	0	0	0	0	0	0	0	0	0	0	1	0	0	0	0	0	0	0	0	0	0
2381-00368	af	Texas	11	0	0	0	0	0	0	0	0	0	0	1	3	0	0	0	0	0	0	0	0	0
2381-00375	af	Texas	11	0	0	0	0	0	0	0	0	0	0	1	0	0	0	0	0	0	0	0	0	0
2381-00376	af	Texas	11	0	0	0	0	0	0	0	0	0	0	1	0	0	0	0	0	0	0	0	0	0
2381-00382	af	Texas	12	0	0	0	0	0	0	0	0	0	0	0	1	2	0	0	0	1	0	0	0	0
2381-00383	af	Texas	12	0	0	0	0	0	0	0	0	0	0	0	1	0	0	0	0	0	0	0	0	0
2381-00384	af	Texas	12	0	0	0	0	0	0	0	0	0	0	0	1	0	0	0	0	0	0	0	0	0
2381-00385	af	Texas	12	0	0	0	0	0	0	0	0	0	0	0	1	0	0	0	0	0	0	0	0	0
2381-00387	af	Texas	12	0	0	0	0	0	0	0	0	0	0	0	1	2	0	0	0	0	0	0	0	0
2381-00388	af	Texas	12	0	0	0	0	0	0	0	0	0	0	0	1	0	0	0	0	0	0	0	0	0
2381-00389	af	Texas	12	0	0	0	0	0	0	0	0	0	0	0	1	2	0	0	0	0	0	0	0	0
2381-00396	af	Texas	12	0	0	0	0	0	0	0	0	0	0	0	1	2	0	0	0	0	0	0	0	0
2381-00399	af	Texas	12	0	0	0	0	0	0	0	0	0	0	0	1	2	0	0	0	0	0	0	0	0
2381-00402	af	Texas	12	0	0	0	0	0	0	0	0	0	0	0	1	0	0	0	0	0	0	0	0	0
2381-00405	af	Texas	12	0	0	0	0	0	0	0	0	0	0	0	1	0	0	0	0	0	0	0	0	0
2381-00406	af	Texas	12	0	0	0	0	0	0	0	0	0	0	0	1	2	0	0	0	0	0	0	0	0
2381-00424	af	Texas	12	0	0	0	0	0	0	0	0	0	0	0	1	0	0	0	0	0	0	0	0	0
2381-00425	af	Texas	12	0	0	0	0	0	0	0	0	0	0	0	1	2	0	0	0	0	0	0	0	0
2381-00426	af	Texas	12	0	0	0	0	0	0	0	0	0	0	0	1	2	0	0	0	0	0	0	0	0
2381-00427	af	Texas	12	0	0	0	0	0	0	0	0	0	0	0	1	2	0	0	0	0	0	0	0	0
2381-00441	af	Texas	12	0	0	0	0	0	0	0	0	0	0	0	1	0	0	0	0	0	0	0	0	0
2381-00447	af	Texas	12	0	0	0	0	0	0	0	0	0	0	0	1	2	0	0	0	0	0	0	0	0
2381-00496	af	Texas	16	0	0	0	0	0	0	0	0	0	0	0	0	0	0	0	1	0	0	0	0	0
2381-00498	af	Texas	16	0	0	0	0	0	0	0	0	0	0	0	0	0	0	0	1	0	0	0	0	0
2381-00500	af	Texas	16	0	0	0	0	0	0	0	0	0	0	0	0	0	0	0	1	0	0	0	0	0
2381-00501	af	Texas	16	0	0	0	0	0	0	0	0	0	0	0	0	0	0	0	1	0	0	0	0	0
2381-00503	af	Texas	16	0	0	0	0	0	0	0	0	0	0	0	0	0	0	0	1	0	0	0	0	3
2381-00505	af	Texas	16	0	0	0	0	0	0	0	0	0	0	0	0	0	0	0	1	0	0	0	0	0
2381-00506	af	Texas	16	0	0	0	0	0	0	0	0	0	0	0	0	0	0	0	1	0	0	0	0	0
2381-00507	af	Texas	16	0	0	0	0	0	0	0	0	0	0	0	0	0	0	0	1	0	0	0	2	0
2381-00514	af	Texas	16	0	0	0	0	0	0	0	0	0	0	0	0	0	0	0	1	0	0	0	0	0
2381-00519	af	Texas	16	0	0	0	0	0	0	0	0	0	0	0	0	0	0	0	1	0	0	0	0	0
2381-00520	af	Texas	16	0	0	0	0	0	0	0	0	0	0	0	0	0	0	0	1	0	0	0	0	0
2381-00522	af	Texas	16	0	0	0	0	0	0	0	0	0	0	0	0	0	0	0	1	0	0	0	0	0
2381-00525	af	Texas	16	0	0	0	0	0	0	0	0	0	0	0	0	0	0	0	1	0	0	0	0	0
2381-00527	af	Texas	16	0	0	0	0	0	0	0	0	0	0	0	0	0	0	0	1	0	0	0	0	0
2381-00528	af	Texas	16	0	0	0	0	0	0	0	0	0	0	0	0	0	0	0	1	0	0	0	0	0
2381-00529	af	Texas	16	0	0	0	0	0	0	0	0	0	0	0	0	0	0	0	1	0	0	0	0	0
2381-00530	af	Texas	16	0	0	0	0	0	0	0	0	0	0	0	0	0	0	0	1	0	0	0	0	0
2381-00531	af	Texas	16	0	0	0	0	0	0	0	0	0	0	0	0	0	0	0	1	0	0	0	0	0
2381-00542	af	Texas	16	0	0	0	0	0	0	0	0	0	0	0	0	0	0	0	1	0	0	0	0	0
2381-00544	af	Texas	16	0	0	0	0	0	0	0	0	0	0	0	0	0	0	0	1	0	0	0	0	0
2381-00546	af	Texas	16	0	0	0	0	0	0	0	0	0	0	0	0	0	0	0	1	0	0	0	0	0
2381-00549	af	Texas	16	0	0	0	0	0	0	0	0	0	0	0	0	0	0	0	1	0	0	0	0	0
2381-08301	af	Texas	17	0	0	0	0	0	0	0	0	0	0	0	0	0	0	0	0	1	0	0	0	0
2381-08304	af	Texas	17	0	0	0	0	0	0	0	0	0	0	0	0	0	0	0	0	1	0	0	0	0
2381-08313	af	Texas	17	0	0	0	0	0	0	0	0	0	0	0	0	0	0	0	0	1	0	0	0	0
2381-08314	af	Texas	17	0	0	0	0	0	0	0	0	0	0	0	0	0	0	0	0	1	0	0	0	0
2381-08315	af	Texas	17	0	0	0	0	0	0	0	0	0	0	0	0	0	0	0	0	1	0	0	0	0
2381-08317	af	Texas	17	0	0	0	0	0	0	0	0	0	0	0	0	0	0	0	0	1	0	0	0	0
2381-08318	af	Texas	17	0	0	0	0	0	0	0	0	0	0	0	0	0	0	0	0	1	0	0	0	0
2381-08320	af	Texas	17	0	0	0	0	0	0	0	0	0	0	0	0	0	0	0	0	1	0	0	0	0
2381-08321	af	Texas	17	0	0	0	0	0	0	0	0	0	0	0	0	0	0	0	0	1	0	0	0	0
2381-08384	af	Texas	19	0	0	0	0	0	0	0	0	0	0	0	0	0	0	0	0	0	0	1	0	0
2381-08385	af	Texas	19	0	0	0	0	0	0	0	0	0	0	0	0	0	0	0	0	0	0	1	0	0
2381-08386	af	Texas	19	0	0	0	0	0	0	0	0	0	0	0	0	0	0	0	0	0	0	1	0	0
2381-08387	af	Texas	19	0	0	0	0	0	0	0	0	0	0	0	0	0	0	0	0	0	0	1	0	0
2381-08388	af	Texas	19	0	0	0	0	0	0	0	0	0	0	0	0	0	0	0	0	0	0	1	0	0
2381-08392	af	Texas	19	0	0	0	0	0	0	0	0	0	0	0	0	0	0	0	0	0	0	1	0	0
2381-08393	af	Texas	19	0	0	0	0	0	0	0	0	0	0	0	0	0	0	0	0	0	0	1	0	0
2381-08394	af	Texas	19	0	0	0	0	0	0	0	0	0	0	0	0	0	0	0	0	0	0	1	0	0
2381-08395	af	Texas	19	0	0	0	0	0	0	0	0	0	0	0	0	0	0	0	0	0	0	1	0	0
2381-08399	af	Texas	19	0	0	0	0	0	0	0	0	0	0	0	0	0	0	0	0	0	0	1	0	0
2381-08400	af	Texas	19	0	0	0	0	0	0	0	0	0	0	0	0	0	0	0	0	0	0	1	0	0
2381-11701	af	Texas	19	0	0	0	0	0	0	0	0	0	0	0	0	0	0	0	0	0	0	1	0	0
2381-11702	af	Texas	19	0	0	0	0	0	0	0	0	0	0	0	0	0	0	0	0	0	0	1	0	0
2381-11703	af	Texas	19	0	0	0	0	0	0	0	0	0	0	0	0	0	0	0	0	0	0	1	0	0
2381-11705	af	Texas	19	0	0	0	0	0	0	0	0	0	0	0	0	0	0	0	0	0	0	1	0	0
2381-11709	af	Texas	19	0	0	0	0	0	0	0	0	0	0	0	0	0	0	0	0	0	0	1	0	0
2381-11710	af	Texas	19	0	0	0	0	0	0	0	0	0	0	0	0	0	0	0	0	0	0	1	2	0
2381-11711	af	Texas	19	0	0	0	0	0	0	0	0	0	0	0	0	0	0	0	0	0	0	1	0	0
2381-11712	af	Texas	19	0	0	0	0	0	0	0	0	0	0	0	0	0	0	0	0	0	0	1	0	0
2381-11714	af	Texas	19	0	0	0	0	0	0	0	0	0	0	0	0	0	0	0	0	0	0	1	0	0
2381-11715	af	Texas	19	0	0	0	0	0	0	0	0	0	0	0	0	0	0	0	0	0	0	1	0	0
2381-11716	af	Texas	19	0	0	0	0	0	0	0	0	0	0	0	0	0	0	0	0	0	0	1	0	0
2381-11717	af	Texas	19	0	0	0	0	0	0	0	0	0	0	0	0	0	0	0	0	0	0	1	0	0
2381-11719	af	Texas	19	0	0	0	0	0	0	0	0	0	0	0	0	0	0	0	0	0	0	1	0	0
2381-11720	af	Texas	19	0	0	0	0	0	0	0	0	0	0	0	0	0	0	0	0	0	0	1	0	0
2381-11531	af	Texas	20	0	0	0	0	0	0	0	0	0	0	0	0	0	0	0	0	0	0	0	1	0
2381-11762	af	Texas	20	0	0	0	0	0	0	0	0	0	0	0	0	0	0	0	0	0	0	0	1	0
2381-11763	af	Texas	20	0	0	0	0	0	0	0	0	0	0	0	0	0	0	0	0	0	0	0	1	0
2381-11764	af	Texas	20	0	0	0	0	0	0	0	0	0	0	0	0	0	0	0	0	0	0	0	1	0
2381-11901	af	Texas	20	0	0	0	0	0	0	0	0	0	0	0	0	0	0	0	0	0	0	0	1	0
2381-11905	af	Texas	20	0	0	0	0	0	0	0	0	0	0	0	0	0	0	0	0	0	0	0	1	0
2381-11906	af	Texas	20	0	0	0	0	0	0	0	0	0	0	0	0	0	0	0	0	0	0	0	1	0
2381-11907	af	Texas	20	0	0	0	0	0	0	0	0	0	0	0	0	0	0	0	0	0	0	0	1	0
2381-11908	af	Texas	20	0	0	0	0	0	0	0	0	0	0	0	0	0	0	0	0	0	0	0	1	0
2381-11909	af	Texas	20	0	0	0	0	0	0	0	0	0	0	0	0	0	0	0	0	0	0	0	1	0
2381-11910	af	Texas	20	0	0	0	0	0	0	0	0	0	0	0	0	0	0	0	0	0	0	0	1	0
2381-11911	af	Texas	20	0	0	0	0	0	0	0	0	0	0	0	0	0	0	0	0	0	0	0	1	0
2381-11912	af	Texas	20	0	0	0	0	0	0	0	0	0	0	0	0	0	0	0	0	0	0	0	1	0
2381-11913	af	Texas	20	0	0	0	0	0	0	0	0	0	0	0	0	0	0	0	0	0	0	0	1	0
2381-11914	af	Texas	20	0	0	0	0	0	0	0	0	0	0	0	0	0	0	0	0	0	0	0	1	0
2381-11915	af	Texas	20	0	0	0	0	0	0	0	0	0	0	0	0	0	0	0	0	0	0	0	1	2
2381-11916	af	Texas	20	0	0	0	0	0	0	0	0	0	0	0	0	0	0	0	0	0	0	0	1	2
2381-11917	af	Texas	20	0	0	0	0	0	0	0	0	0	0	0	0	0	0	0	0	0	0	0	1	0
2381-11918	af	Texas	20	0	0	0	0	0	0	0	0	0	0	0	0	0	0	0	0	0	0	0	1	0
2381-11919	af	Texas	20	0	0	0	0	0	0	0	0	0	0	0	0	0	0	0	0	0	0	0	1	0
2381-11920	af	Texas	20	0	0	0	0	0	0	0	0	0	0	0	0	0	0	0	0	0	0	0	1	3
2381-11921	af	Texas	20	0	0	0	0	0	0	0	0	0	0	0	0	0	0	0	0	0	0	0	1	0
2381-11922	af	Texas	20	0	0	0	0	0	0	0	0	0	0	0	0	0	0	0	0	0	0	0	1	0
2381-11923	af	Texas	20	0	0	0	0	0	0	0	0	0	0	0	0	0	0	0	0	0	0	0	1	0
2381-11868	af	Texas	21	0	0	0	0	0	0	0	0	0	0	0	0	0	0	0	0	0	0	0	0	1
2381-11878	af	Texas	21	0	0	0	0	0	0	0	0	0	0	0	0	0	0	0	0	0	0	0	0	1
2381-11879	af	Texas	21	0	0	0	0	0	0	0	0	0	0	0	0	0	0	0	0	0	0	0	0	1
2381-11881	af	Texas	21	0	0	0	0	0	0	0	0	0	0	0	0	0	0	0	0	0	0	0	0	1
2381-11885	af	Texas	21	0	0	0	0	0	0	0	0	0	0	0	0	0	0	0	0	0	0	0	0	1
2381-11886	af	Texas	21	0	0	0	0	0	0	0	0	0	0	0	0	0	0	0	0	0	0	0	0	1
2381-11887	af	Texas	21	0	0	0	0	0	0	0	0	0	0	0	0	0	0	0	0	0	0	0	0	1
2381-11888	af	Texas	21	0	0	0	0	0	0	0	0	0	0	0	0	0	0	0	0	0	0	0	0	1
2381-11889	af	Texas	21	0	0	0	0	0	0	0	0	0	0	0	0	0	0	0	0	0	0	0	0	1
2381-11890	af	Texas	21	0	0	0	0	0	0	0	0	0	0	0	0	0	0	0	0	0	0	0	0	1
2381-11891	af	Texas	21	0	0	0	0	0	0	0	0	0	0	0	0	0	0	0	0	0	0	0	0	1
2381-11893	af	Texas	21	0	0	0	0	0	0	0	0	0	0	0	0	0	0	0	0	0	0	0	0	1
2381-11894	af	Texas	21	0	0	0	0	0	0	0	0	0	0	0	0	0	0	0	0	0	0	0	0	1
2851-00804	af	Texas	21	0	0	0	0	0	0	0	0	0	0	0	0	0	0	0	0	0	0	0	0	1
2851-00806	af	Texas	21	0	0	0	0	0	0	0	0	0	0	0	0	0	0	0	0	0	0	0	0	1
2851-00807	af	Texas	21	0	0	0	0	0	0	0	0	0	0	0	0	0	0	0	0	0	0	0	0	1
2851-00808	af	Texas	21	0	0	0	0	0	0	0	0	0	0	0	0	0	0	0	0	0	0	0	0	1
2851-00809	af	Texas	21	0	0	0	0	0	0	0	0	0	0	0	0	0	0	0	0	0	0	0	0	1
2851-00810	af	Texas	21	0	0	0	0	0	0	0	0	0	0	0	0	0	0	0	0	0	0	0	0	1
2851-00811	af	Texas	21	0	0	0	0	0	0	0	0	0	0	0	0	0	0	0	0	0	0	0	0	1
2851-00813	af	Texas	21	0	0	0	0	0	0	0	0	0	0	0	0	0	0	0	0	0	0	0	0	1
802113002	am	Texas	2	0	1	2	0	0	0	0	0	0	0	0	0	0	0	0	0	0	0	0	0	0
802113003	am	Texas	2	0	1	2	0	0	0	0	0	0	0	0	0	0	0	0	0	0	0	0	0	0
802113004	am	Texas	2	0	1	2	0	0	0	0	0	0	0	0	0	0	0	0	0	0	0	0	0	0
802113005	am	Texas	2	0	1	2	0	0	0	0	0	0	0	0	0	0	0	0	0	0	0	0	0	0
802113006	am	Texas	2	0	1	2	0	0	0	0	0	0	0	0	0	0	0	0	0	0	0	0	0	0
802113011	am	Texas	2	0	1	2	0	0	0	0	0	0	0	0	0	0	0	0	0	0	0	0	0	0
802113013	am	Texas	2	0	1	2	0	0	0	0	0	0	0	0	0	0	0	0	0	0	0	0	0	0
802113014	am	Texas	2	0	1	2	0	0	0	0	0	0	0	0	0	0	0	0	0	0	0	0	0	0
802113015	am	Texas	2	0	1	2	0	0	0	0	0	0	0	0	0	0	0	0	0	0	0	0	0	0
802113017	am	Texas	2	0	1	2	0	0	0	0	0	0	0	0	0	0	0	0	0	0	0	0	0	0
802113019	am	Texas	2	0	1	0	0	0	0	0	0	0	0	0	0	0	0	0	0	0	0	0	0	0
802113023	am	Texas	2	0	1	2	0	0	0	0	0	0	0	0	0	0	0	0	0	0	0	0	0	0
802113024	am	Texas	2	0	1	2	0	0	0	0	0	0	0	0	0	0	0	0	0	0	0	0	0	0
802113025	am	Texas	2	0	1	2	0	0	0	0	0	0	0	0	0	0	0	0	0	0	0	0	0	0
802113026	am	Texas	2	0	1	2	0	0	0	0	0	0	0	0	0	0	0	0	0	0	0	0	0	0
802113027	am	Texas	2	0	1	2	0	0	0	0	0	0	0	0	0	0	0	0	0	0	0	0	0	0
802113028	am	Texas	2	0	1	2	0	0	0	0	0	0	0	0	0	0	0	0	0	0	0	0	0	0
802113029	am	Texas	2	0	1	0	0	0	0	0	0	0	0	0	0	0	0	0	0	0	0	0	0	0
802113033	am	Texas	2	0	1	2	0	0	0	0	0	0	0	0	0	0	0	0	0	0	0	0	0	0
802113034	am	Texas	2	0	1	0	0	0	0	0	0	0	0	0	0	0	0	0	0	0	0	0	0	0
802113037	am	Texas	2	0	1	0	0	0	0	0	0	0	0	0	0	0	0	0	0	0	0	0	0	0
802113038	am	Texas	2	0	1	2	0	0	0	0	0	0	0	0	0	0	0	0	0	0	0	0	0	0
802113039	am	Texas	2	0	1	2	0	0	0	0	0	0	0	0	0	0	0	0	0	0	0	0	0	0
802113040	am	Texas	2	0	1	2	0	0	0	0	0	0	0	0	0	0	0	0	0	0	0	0	0	0
802113043	am	Texas	2	0	1	2	0	0	0	0	0	0	0	0	0	0	0	0	0	0	0	0	0	0
802113044	am	Texas	2	0	1	2	0	0	0	0	0	0	0	0	0	0	0	0	0	0	0	0	0	0
802113045	am	Texas	2	0	1	2	0	0	0	0	0	0	0	0	0	0	0	0	0	0	0	0	0	0
802113046	am	Texas	2	0	1	2	0	0	0	0	0	0	0	0	0	0	0	0	0	0	0	0	0	0
802113047	am	Texas	2	0	1	2	0	0	0	0	0	0	0	0	0	0	0	0	0	0	0	0	0	0
802113048	am	Texas	2	0	1	0	0	0	0	0	0	0	0	0	0	0	0	0	0	0	0	0	0	0
802113050	am	Texas	2	0	1	2	0	0	0	0	0	0	0	0	0	0	0	0	0	0	0	0	0	0
802113052	am	Texas	2	0	1	2	0	0	0	0	0	0	0	0	0	0	0	0	0	0	0	0	0	0
802113056	am	Texas	2	0	1	0	0	0	0	0	0	0	0	0	0	0	0	0	0	0	0	0	0	0
802113059	am	Texas	2	0	1	2	0	0	0	0	0	0	0	0	0	0	0	0	0	0	0	0	0	0
802113063	am	Texas	2	0	1	2	0	0	0	0	0	0	0	0	0	0	0	0	0	0	0	0	0	0
802113064	am	Texas	2	0	1	2	0	0	0	0	0	0	0	0	0	0	0	0	0	0	0	0	0	0
802113072	am	Texas	2	0	1	2	0	0	0	0	0	0	0	0	0	0	0	0	0	0	0	0	0	0
802113073	am	Texas	2	0	1	2	0	0	0	0	0	0	0	0	0	0	0	0	0	0	0	0	0	0
802113074	am	Texas	2	0	1	2	0	0	0	0	0	0	0	0	0	0	0	0	0	0	0	0	0	0
802113075	am	Texas	2	0	1	2	0	0	0	0	0	0	0	0	0	0	0	0	0	0	0	0	0	0
802113083	am	Texas	2	0	1	2	0	0	0	0	0	0	0	0	0	0	0	0	0	0	0	0	0	0
802113091	am	Texas	2	0	1	2	0	0	0	0	0	0	0	0	0	0	0	0	0	0	0	0	0	0
802113095	am	Texas	2	0	1	2	0	0	0	0	0	0	0	0	0	0	0	0	0	0	0	0	0	0
802113098	am	Texas	2	0	1	2	0	0	0	0	0	0	0	0	0	0	0	0	0	0	0	0	0	0
802113100	am	Texas	2	0	1	2	0	0	0	0	0	0	0	0	0	0	0	0	0	0	0	0	0	0
802113101	am	Texas	2	0	1	2	0	0	0	0	0	0	0	0	0	0	0	0	0	0	0	0	0	0
802113102	am	Texas	2	0	1	2	0	0	0	0	0	0	0	0	0	0	0	0	0	0	0	0	0	0
802113103	am	Texas	2	0	1	2	0	0	0	0	0	0	0	0	0	0	0	0	0	0	0	0	0	0
802113106	am	Texas	2	0	1	2	0	0	0	0	0	0	0	0	0	0	0	0	0	0	0	0	0	0
802113109	am	Texas	2	0	1	2	0	0	0	0	0	0	0	0	0	0	0	0	0	0	0	0	0	0
802113111	am	Texas	2	0	1	2	0	0	0	0	0	0	0	0	0	0	0	0	0	0	0	0	0	0
802113113	am	Texas	2	0	1	0	0	0	0	0	0	0	0	0	0	0	0	0	0	0	0	0	0	0
802113115	am	Texas	2	0	1	0	0	0	0	0	0	0	0	0	0	0	0	0	0	0	0	0	0	0
802113116	am	Texas	2	0	1	2	0	0	0	0	0	0	0	0	0	0	0	0	0	0	0	0	0	0
802113121	am	Texas	2	0	1	2	0	0	0	0	0	0	0	0	0	0	0	0	0	0	0	0	0	0
802113123	am	Texas	2	0	1	2	0	0	0	0	0	0	0	0	0	0	0	0	0	0	0	0	0	0
802113127	am	Texas	2	0	1	0	0	0	0	0	0	0	0	0	0	0	0	0	0	0	0	0	0	0
802113160	am	Texas	2	0	1	0	0	0	0	0	0	0	0	0	0	0	0	0	0	0	0	0	0	0
802113162	am	Texas	2	0	1	2	0	0	0	0	0	0	0	0	0	0	0	0	0	0	0	0	0	0
802113174	am	Texas	2	0	1	2	0	0	0	0	0	0	0	0	0	0	0	0	0	0	0	0	0	0
802113209	am	Texas	3	0	0	1	0	0	0	0	0	0	0	0	0	0	0	0	0	0	0	0	0	0
802113210	am	Texas	3	0	0	1	0	0	0	0	0	0	0	0	0	0	0	0	0	0	0	0	0	0
802113212	am	Texas	3	0	0	1	0	0	0	0	0	0	0	0	0	0	0	0	0	0	0	0	0	0
802113214	am	Texas	3	0	0	1	0	0	0	0	0	0	0	0	0	0	0	0	0	0	0	0	0	0
802113216	am	Texas	3	0	0	1	0	0	0	0	0	0	0	0	0	0	0	0	0	0	0	0	0	0
802113218	am	Texas	3	0	0	1	0	0	0	0	0	0	0	0	0	0	0	0	0	0	0	0	0	0
802113220	am	Texas	3	0	0	1	0	0	0	0	0	0	0	0	0	0	0	0	0	0	0	0	0	0
802113221	am	Texas	3	0	0	1	0	0	0	0	0	0	0	0	0	0	0	0	0	0	0	0	0	0
802113223	am	Texas	3	0	0	1	0	0	0	0	0	0	0	0	0	0	0	0	0	0	0	0	0	0
802113272	am	Texas	3	0	0	1	0	0	0	0	0	0	0	0	0	0	0	0	0	0	0	0	0	0
802113274	am	Texas	3	0	0	1	0	0	0	0	0	0	0	0	0	0	0	0	0	0	0	0	0	0
802113291	am	Texas	3	0	0	1	0	0	0	0	0	0	0	0	0	0	0	0	0	0	0	0	0	0
802113292	am	Texas	3	0	0	1	0	0	0	0	0	0	0	0	0	0	0	0	0	0	0	0	0	0
802113321	am	Texas	3	0	0	1	0	0	0	0	0	0	0	0	0	0	0	0	0	0	0	0	0	0
802113323	am	Texas	3	0	0	1	0	0	0	0	0	0	0	0	0	0	0	0	0	0	0	0	0	0
2381-00308	am	Texas	11	0	0	0	0	0	0	0	0	0	0	1	0	0	0	0	0	0	0	0	0	0
2381-00311	am	Texas	11	0	0	0	0	0	0	0	0	0	0	1	2	2	0	0	0	0	0	0	0	0
2381-00313	am	Texas	11	0	0	0	0	0	0	0	0	0	0	1	2	0	0	0	0	0	0	0	0	0
2381-00315	am	Texas	11	0	0	0	0	0	0	0	0	0	0	1	3	2	0	0	0	0	0	0	0	0
2381-00316	am	Texas	11	0	0	0	0	0	0	0	0	0	0	1	0	0	0	0	0	0	0	0	0	0
2381-00329	am	Texas	11	0	0	0	0	0	0	0	0	0	0	1	0	0	0	0	0	0	0	0	0	0
2381-00330	am	Texas	11	0	0	0	0	0	0	0	0	0	0	1	2	2	0	0	0	0	0	0	0	0
2381-00333	am	Texas	11	0	0	0	0	0	0	0	0	0	0	1	2	0	0	0	0	0	0	0	0	0
2381-00348	am	Texas	11	0	0	0	0	0	0	0	0	0	0	1	0	0	0	0	0	0	0	0	0	0
8021-13188	am	Texas	11	0	0	0	0	0	0	0	0	0	0	1	1	0	0	0	0	0	0	0	0	0
2381-00386	am	Texas	12	0	0	0	0	0	0	0	0	0	0	0	1	2	0	0	2	0	0	0	0	0
2381-00390	am	Texas	12	0	0	0	0	0	0	0	0	0	0	0	1	0	0	0	0	0	0	0	0	0
2381-00391	am	Texas	12	0	0	0	0	0	0	0	0	0	0	0	1	2	0	0	0	0	0	0	0	0
2381-00414	am	Texas	12	0	0	0	0	0	0	0	0	0	0	0	1	2	0	0	0	0	0	0	0	0
2381-00417	am	Texas	12	0	0	0	0	0	0	0	0	0	0	0	1	0	0	0	0	0	0	0	0	0
2381-00421	am	Texas	12	0	0	0	0	0	0	0	0	0	0	0	1	0	0	0	0	0	0	0	0	0
2381-00422	am	Texas	12	0	0	0	0	0	0	0	0	0	0	0	1	2	0	0	0	0	0	0	0	0
2381-00423	am	Texas	12	0	0	0	0	0	0	0	0	0	0	0	1	2	0	0	0	0	0	0	0	0
2381-00429	am	Texas	12	0	0	0	0	0	0	0	0	0	0	0	1	2	0	0	0	0	0	0	0	0
2381-00430	am	Texas	12	0	0	0	0	0	0	0	0	0	0	0	1	2	0	0	0	0	0	0	0	0
2381-00437	am	Texas	12	0	0	0	0	0	0	0	0	0	0	0	1	2	0	0	0	0	0	0	0	0
2381-00442	am	Texas	12	0	0	0	0	0	0	0	0	0	0	0	1	2	0	0	0	0	0	0	0	0
2381-00497	am	Texas	16	0	0	0	0	0	0	0	0	0	0	0	0	0	0	0	1	0	0	0	0	0
2381-00499	am	Texas	16	0	0	0	0	0	0	0	0	0	0	0	0	0	0	0	1	0	0	0	0	0
2381-00502	am	Texas	16	0	0	0	0	0	0	0	0	0	0	0	0	0	0	0	1	1	0	0	0	0
2381-00504	am	Texas	16	0	0	0	0	0	0	0	0	0	0	0	0	0	0	0	1	0	0	0	0	0
2381-00513	am	Texas	16	0	0	0	0	0	0	0	0	0	0	0	0	0	0	0	1	0	0	0	0	0
2381-00521	am	Texas	16	0	0	0	0	0	0	0	0	0	0	0	0	0	0	0	1	0	0	0	0	0
2381-00523	am	Texas	16	0	0	0	0	0	0	0	0	0	0	0	0	0	0	0	1	0	0	0	0	0
2381-00524	am	Texas	16	0	0	0	0	0	0	0	0	0	0	0	0	0	0	0	1	0	0	0	0	0
2381-00526	am	Texas	16	0	0	0	0	0	0	0	0	0	0	0	0	0	0	0	1	0	0	0	0	0
2381-00547	am	Texas	16	0	0	0	0	0	0	0	0	0	0	0	0	0	0	0	1	0	0	0	0	0
2381-08302	am	Texas	17	0	0	0	0	0	0	0	0	0	0	0	0	0	0	0	0	1	0	0	0	2
2381-08311	am	Texas	17	0	0	0	0	0	0	0	0	0	0	0	0	0	0	0	0	1	0	0	0	0
2381-08316	am	Texas	17	0	0	0	0	0	0	0	0	0	0	0	0	0	0	0	0	1	0	0	0	0
2381-08319	am	Texas	17	0	0	0	0	0	0	0	0	0	0	0	0	0	0	0	0	1	0	0	0	0
2381-08336	am	Texas	17	0	0	0	0	0	0	0	0	0	0	0	0	0	0	0	0	1	0	0	0	0
2381-08382	am	Texas	19	0	0	0	0	0	0	0	0	0	0	0	0	0	0	0	0	0	0	1	0	0
2381-08383	am	Texas	19	0	0	0	0	0	0	0	0	0	0	0	0	0	0	0	0	0	0	1	0	0
2381-08396	am	Texas	19	0	0	0	0	0	0	0	0	0	0	0	0	0	0	0	0	0	0	1	0	0
2381-08397	am	Texas	19	0	0	0	0	0	0	0	0	0	0	0	0	0	0	0	0	0	0	1	0	0
2381-08398	am	Texas	19	0	0	0	0	0	0	0	0	0	0	0	0	0	0	0	0	0	0	1	0	0
2381-11704	am	Texas	19	0	0	0	0	0	0	0	0	0	0	0	0	0	0	0	0	0	0	1	0	0
2381-11706	am	Texas	19	0	0	0	0	0	0	0	0	0	0	0	0	0	0	0	0	0	0	1	0	0
2381-11708	am	Texas	19	0	0	0	0	0	0	0	0	0	0	0	0	0	0	0	0	0	0	1	0	0
2381-11713	am	Texas	19	0	0	0	0	0	0	0	0	0	0	0	0	0	0	0	0	0	0	1	0	0
2381-11718	am	Texas	19	0	0	0	0	0	0	0	0	0	0	0	0	0	0	0	0	0	0	1	0	0
2381-11903	am	Texas	20	0	0	0	0	0	0	0	0	0	0	0	0	0	0	0	0	0	0	0	1	2
2381-11924	am	Texas	20	0	0	0	0	0	0	0	0	0	0	0	0	0	0	0	0	0	0	0	1	0
2381-11925	am	Texas	20	0	0	0	0	0	0	0	0	0	0	0	0	0	0	0	0	0	0	0	1	2
2381-11935	am	Texas	20	0	0	0	0	0	0	0	0	0	0	0	0	0	0	0	0	0	0	0	1	0
2381-11937	am	Texas	20	0	0	0	0	0	0	0	0	0	0	0	0	0	0	0	0	0	0	0	1	0
2381-11765	am	Texas	21	0	0	0	0	0	0	0	0	0	0	0	0	0	0	0	0	0	0	0	0	1
2381-11869	am	Texas	21	0	0	0	0	0	0	0	0	0	0	0	0	0	0	0	0	0	0	0	0	1
2381-11870	am	Texas	21	0	0	0	0	0	0	0	0	0	0	0	0	0	0	0	0	0	0	0	0	1
2381-11871	am	Texas	21	0	0	0	0	0	0	0	0	0	0	0	0	0	0	0	0	0	0	0	0	1
2381-11872	am	Texas	21	0	0	0	0	0	0	0	0	0	0	0	0	0	0	0	0	0	0	0	0	1
2381-11880	am	Texas	21	0	0	0	0	0	0	0	0	0	0	0	0	0	0	0	0	0	0	0	0	1
2381-11884	am	Texas	21	0	0	0	0	0	0	0	0	0	0	0	0	0	0	0	0	0	0	0	0	1
2381-11892	am	Texas	21	0	0	0	0	0	0	0	0	0	0	0	0	0	0	0	0	0	0	0	0	1
802113066	jf	Texas	2	0	1	0	0	0	0	0	0	0	0	0	0	0	0	0	0	0	0	0	0	0
802113067	jf	Texas	2	0	1	0	0	0	0	0	0	0	0	0	0	0	0	0	0	0	0	0	0	0
802113071	jf	Texas	2	0	1	2	0	0	0	0	0	0	0	0	0	0	0	0	0	0	0	0	0	0
802113076	jf	Texas	2	0	1	0	0	0	0	0	0	0	0	0	0	0	0	0	0	0	0	0	0	0
802113078	jf	Texas	2	0	1	0	0	0	0	0	0	0	0	0	0	0	0	0	0	0	0	0	0	0
802113079	jf	Texas	2	0	1	0	0	0	0	0	0	0	0	0	0	0	0	0	0	0	0	0	0	0
802113080	jf	Texas	2	0	1	0	0	0	0	0	0	0	0	0	0	0	0	0	0	0	0	0	0	0
802113081	jf	Texas	2	0	1	0	0	0	0	0	0	0	0	0	0	0	0	0	0	0	0	0	0	0
802113082	jf	Texas	2	0	1	0	0	0	0	0	0	0	0	0	0	0	0	0	0	0	0	0	0	0
802113086	jf	Texas	2	0	1	0	0	0	0	0	0	0	0	0	0	0	0	0	0	0	0	0	0	0
802113087	jf	Texas	2	0	1	2	0	0	0	0	0	0	0	0	0	0	0	0	0	0	0	0	0	0
802113134	jf	Texas	2	0	1	0	0	0	0	0	0	0	0	0	0	0	0	0	0	0	0	0	0	0
802113137	jf	Texas	2	0	1	2	0	0	0	0	0	0	0	0	0	0	0	0	0	0	0	0	0	0
802113141	jf	Texas	2	0	1	2	0	0	0	0	0	0	0	0	0	0	0	0	0	0	0	0	0	0
802113142	jf	Texas	2	0	1	0	0	0	0	0	0	0	0	0	0	0	0	0	0	0	0	0	0	0
802113144	jf	Texas	2	0	1	2	0	0	0	0	0	0	0	0	0	0	0	0	0	0	0	0	0	0
802113145	jf	Texas	2	0	1	0	0	0	0	0	0	0	0	0	0	0	0	0	0	0	0	0	0	0
802113147	jf	Texas	2	0	1	0	0	0	0	0	0	0	0	0	0	0	0	0	0	0	0	0	0	0
802113149	jf	Texas	2	0	1	0	0	0	0	0	0	0	0	0	0	0	0	0	0	0	0	0	0	0
802113151	jf	Texas	2	0	1	0	0	0	0	0	0	0	0	0	0	0	0	0	0	0	0	0	0	0
802113152	jf	Texas	2	0	1	0	0	0	0	0	0	0	0	0	0	0	0	0	0	0	0	0	0	0
802113156	jf	Texas	2	0	1	2	0	0	0	0	0	0	0	0	0	0	0	0	0	0	0	0	0	0
802113175	jf	Texas	2	0	1	0	0	0	0	0	0	0	0	0	0	0	0	0	0	0	0	0	0	0
802113177	jf	Texas	2	0	1	0	0	0	0	0	0	0	0	0	0	0	0	0	0	0	0	0	0	0
802113182	jf	Texas	2	0	1	0	0	0	0	0	0	0	0	0	0	0	0	0	0	0	0	0	0	0
802113186	jf	Texas	2	0	1	0	0	0	0	0	0	0	0	0	0	0	0	0	0	0	0	0	0	0
802113189	jf	Texas	2	0	1	2	0	0	0	0	0	0	0	0	0	0	0	0	0	0	0	0	0	0
802113190	jf	Texas	2	0	1	0	0	0	0	0	0	0	0	0	0	0	0	0	0	0	0	0	0	0
802113191	jf	Texas	2	0	1	0	0	0	0	0	0	0	0	0	0	0	0	0	0	0	0	0	0	0
802113192	jf	Texas	2	0	1	0	0	0	0	0	0	0	0	0	0	0	0	0	0	0	0	0	0	0
802113193	jf	Texas	2	0	1	0	0	0	0	0	0	0	0	0	0	0	0	0	0	0	0	0	0	0
802113195	jf	Texas	2	0	1	0	0	0	0	0	0	0	0	0	0	0	0	0	0	0	0	0	0	0
802113197	jf	Texas	2	0	1	0	0	0	0	0	0	0	0	0	0	0	0	0	0	0	0	0	0	0
802113198	jf	Texas	2	0	1	0	0	0	0	0	0	0	0	0	0	0	0	0	0	0	0	0	0	0
802113199	jf	Texas	2	0	1	0	0	0	0	0	0	0	0	0	0	0	0	0	0	0	0	0	0	0
802113202	jf	Texas	2	0	1	0	0	0	0	0	0	0	0	0	0	0	0	0	0	0	0	0	0	0
802113207	jf	Texas	3	0	0	1	0	0	0	0	0	0	0	0	0	0	0	0	0	0	0	0	0	0
802113208	jf	Texas	3	0	0	1	0	0	0	0	0	0	0	0	0	0	0	0	0	0	0	0	0	0
802113226	jf	Texas	3	0	0	1	0	0	0	0	0	0	0	0	0	0	0	0	0	0	0	0	0	0
802113229	jf	Texas	3	0	0	1	0	0	0	0	0	0	0	0	0	0	0	0	0	0	0	0	0	0
802113234	jf	Texas	3	0	0	1	0	0	0	0	0	0	0	0	0	0	0	0	0	0	0	0	0	0
802113235	jf	Texas	3	0	0	1	0	0	0	0	0	0	0	0	0	0	0	0	0	0	0	0	0	0
802113236	jf	Texas	3	0	0	1	0	0	0	0	0	0	0	0	0	0	0	0	0	0	0	0	0	0
802113237	jf	Texas	3	0	0	1	0	0	0	0	0	0	0	0	0	0	0	0	0	0	0	0	0	0
802113239	jf	Texas	3	0	0	1	0	0	0	0	0	0	0	0	0	0	0	0	0	0	0	0	0	0
802113240	jf	Texas	3	0	0	1	0	0	0	0	0	0	0	0	0	0	0	0	0	0	0	0	0	0
802113241	jf	Texas	3	0	0	1	0	0	0	0	0	0	0	0	0	0	0	0	0	0	0	0	0	0
802113242	jf	Texas	3	0	0	1	0	0	0	0	0	0	0	0	0	0	0	0	0	0	0	0	0	0
802113243	jf	Texas	3	0	0	1	0	0	0	0	0	0	0	0	0	0	0	0	0	0	0	0	0	0
802113244	jf	Texas	3	0	0	1	0	0	0	0	0	0	0	0	0	0	0	0	0	0	0	0	0	0
802113250	jf	Texas	3	0	0	1	0	0	0	0	0	0	0	0	0	0	0	0	0	0	0	0	0	0
802113252	jf	Texas	3	0	0	1	0	0	0	0	0	0	0	0	0	0	0	0	0	0	0	0	0	0
802113253	jf	Texas	3	0	0	1	0	0	0	0	0	0	0	0	0	0	0	0	0	0	0	0	0	0
802113256	jf	Texas	3	0	0	1	0	0	0	0	0	0	0	0	0	0	0	0	0	0	0	0	0	0
802113257	jf	Texas	3	0	0	1	0	0	0	0	0	0	0	0	0	0	0	0	0	0	0	0	0	0
802113259	jf	Texas	3	0	0	1	0	0	0	0	0	0	0	0	0	0	0	0	0	0	0	0	0	0
802113260	jf	Texas	3	0	0	1	0	0	0	0	0	0	0	0	0	2	0	0	0	0	0	0	0	0
802113263	jf	Texas	3	0	0	1	0	0	0	0	0	0	0	0	0	0	0	0	0	0	0	0	0	0
802113267	jf	Texas	3	0	0	1	0	0	0	0	0	0	0	0	0	0	0	0	0	0	0	0	0	0
802113277	jf	Texas	3	0	0	1	0	0	0	0	0	0	0	0	0	0	0	0	0	0	0	0	0	0
802113278	jf	Texas	3	0	0	1	0	0	0	0	0	0	0	0	0	0	0	0	0	0	0	0	0	0
802113279	jf	Texas	3	0	0	1	0	0	0	0	0	0	0	0	0	0	0	0	0	0	0	0	0	0
802113281	jf	Texas	3	0	0	1	0	0	0	0	0	0	0	0	0	0	0	0	0	0	0	0	0	0
802113287	jf	Texas	3	0	0	1	0	0	0	0	0	0	0	0	0	0	0	0	0	0	0	0	0	0
802113294	jf	Texas	3	0	0	1	0	0	0	0	0	0	0	0	0	0	0	0	0	0	0	0	0	0
802113303	jf	Texas	3	0	0	1	0	0	0	0	0	0	0	0	0	0	0	0	0	0	0	0	0	0
802113305	jf	Texas	3	0	0	1	0	0	0	0	0	0	0	0	0	0	0	0	0	0	0	0	0	0
802113310	jf	Texas	3	0	0	1	0	0	0	0	0	0	0	0	0	0	0	0	0	0	0	0	0	0
802113312	jf	Texas	3	0	0	1	0	0	0	0	0	0	0	0	0	0	0	0	0	0	0	0	0	0
802113316	jf	Texas	3	0	0	1	0	0	0	0	0	0	0	0	0	0	0	0	0	0	0	0	0	0
802113317	jf	Texas	3	0	0	1	0	0	0	0	0	0	0	0	0	0	0	0	0	0	0	0	0	0
802113319	jf	Texas	3	0	0	1	0	0	0	0	0	0	0	0	0	0	0	0	0	0	0	0	0	0
802113327	jf	Texas	3	0	0	1	0	0	0	0	0	0	0	0	0	0	0	0	0	0	0	0	0	0
802113328	jf	Texas	3	0	0	1	0	0	0	0	0	0	0	0	0	0	0	0	0	0	0	0	0	0
802113329	jf	Texas	3	0	0	1	0	0	0	0	0	0	0	0	0	0	0	0	0	0	0	0	0	0
802113331	jf	Texas	3	0	0	1	0	0	0	0	0	0	0	0	0	0	0	0	0	0	0	0	0	0
802113333	jf	Texas	3	0	0	1	0	0	0	0	0	0	0	0	0	0	0	0	0	0	0	0	0	0
802113335	jf	Texas	3	0	0	1	0	0	0	0	0	0	0	0	0	0	0	0	0	0	0	0	0	0
802113339	jf	Texas	3	0	0	1	0	0	0	0	0	0	0	0	0	0	0	0	0	0	0	0	0	0
2381-00306	jf	Texas	11	0	0	0	0	0	0	0	0	0	0	1	0	0	0	0	0	0	0	0	0	0
2381-00317	jf	Texas	11	0	0	0	0	0	0	0	0	0	0	1	0	0	0	0	0	0	0	0	0	0
2381-00323	jf	Texas	11	0	0	0	0	0	0	0	0	0	0	1	0	0	0	0	0	0	0	0	0	0
2381-00327	jf	Texas	11	0	0	0	0	0	0	0	0	0	0	1	0	0	0	0	0	0	0	0	0	0
2381-00334	jf	Texas	11	0	0	0	0	0	0	0	0	0	0	1	0	0	0	0	0	0	0	0	0	0
2381-00335	jf	Texas	11	0	0	0	0	0	0	0	0	0	0	1	0	0	0	0	0	0	0	0	0	0
2381-00336	jf	Texas	11	0	0	0	0	0	0	0	0	0	0	1	0	0	0	0	0	0	0	0	0	0
2381-00350	jf	Texas	11	0	0	0	0	0	0	0	0	0	0	1	0	0	0	0	0	0	0	0	0	0
2381-00351	jf	Texas	11	0	0	0	0	0	0	0	0	0	0	1	0	0	0	0	0	0	0	0	0	0
2381-00352	jf	Texas	11	0	0	0	0	0	0	0	0	0	0	1	0	0	0	0	0	0	0	0	0	0
2381-00354	jf	Texas	11	0	0	0	0	0	0	0	0	0	0	1	0	2	0	0	0	0	0	0	0	0
2381-00356	jf	Texas	11	0	0	0	0	0	0	0	0	0	0	1	0	0	0	0	0	0	0	0	0	0
2381-00358	jf	Texas	11	0	0	0	0	0	0	0	0	0	0	1	0	0	0	0	0	0	0	0	0	0
2381-00360	jf	Texas	11	0	0	0	0	0	0	0	0	0	0	1	0	0	0	0	0	0	0	0	0	0
2381-00364	jf	Texas	11	0	0	0	0	0	0	0	0	0	0	1	0	0	0	0	1	0	0	0	0	0
2381-00365	jf	Texas	11	0	0	0	0	0	0	0	0	0	0	1	0	0	0	0	0	0	0	0	0	0
2381-00371	jf	Texas	11	0	0	0	0	0	0	0	0	0	0	1	0	0	0	0	0	0	0	0	0	0
2381-00372	jf	Texas	11	0	0	0	0	0	0	0	0	0	0	1	0	0	0	0	0	0	0	0	0	0
2381-00377	jf	Texas	11	0	0	0	0	0	0	0	0	0	0	1	0	0	0	0	0	0	0	0	0	0
2381-00379	jf	Texas	11	0	0	0	0	0	0	0	0	0	0	1	0	0	0	0	0	0	0	0	0	0
2381-00380	jf	Texas	11	0	0	0	0	0	0	0	0	0	0	1	0	0	0	0	0	0	0	0	0	0
2381-00381	jf	Texas	11	0	0	0	0	0	0	0	0	0	0	1	0	0	0	0	0	0	0	0	0	0
2381-00392	jf	Texas	12	0	0	0	0	0	0	0	0	0	0	0	1	2	0	0	0	0	0	0	0	0
2381-00393	jf	Texas	12	0	0	0	0	0	0	0	0	0	0	0	1	0	0	0	0	0	0	0	0	0
2381-00394	jf	Texas	12	0	0	0	0	0	0	0	0	0	0	0	1	0	0	0	0	0	0	0	0	0
2381-00403	jf	Texas	12	0	0	0	0	0	0	0	0	0	0	0	1	0	0	0	0	0	0	0	0	0
2381-00404	jf	Texas	12	0	0	0	0	0	0	0	0	0	0	0	1	0	0	0	0	0	0	0	0	0
2381-00408	jf	Texas	12	0	0	0	0	0	0	0	0	0	0	0	1	0	0	0	0	0	0	0	0	0
2381-00411	jf	Texas	12	0	0	0	0	0	0	0	0	0	0	0	1	0	0	0	0	0	0	0	0	0
2381-00415	jf	Texas	12	0	0	0	0	0	0	0	0	0	0	0	1	0	0	0	0	0	0	0	0	0
2381-00419	jf	Texas	12	0	0	0	0	0	0	0	0	0	0	0	1	0	0	0	0	0	0	0	0	0
2381-00431	jf	Texas	12	0	0	0	0	0	0	0	0	0	0	0	1	0	0	0	0	0	0	0	0	0
2381-00434	jf	Texas	12	0	0	0	0	0	0	0	0	0	0	0	1	0	0	0	0	0	0	0	0	0
2381-00435	jf	Texas	12	0	0	0	0	0	0	0	0	0	0	0	1	0	0	0	0	0	0	0	0	0
2381-00438	jf	Texas	12	0	0	0	0	0	0	0	0	0	0	0	1	0	0	0	0	0	0	0	0	0
2381-00439	jf	Texas	12	0	0	0	0	0	0	0	0	0	0	0	1	0	0	0	0	0	0	0	0	0
2381-00440	jf	Texas	12	0	0	0	0	0	0	0	0	0	0	0	1	0	0	0	0	0	0	0	0	0
2381-00443	jf	Texas	12	0	0	0	0	0	0	0	0	0	0	0	1	2	0	0	0	0	0	0	0	0
2381-00444	jf	Texas	12	0	0	0	0	0	0	0	0	0	0	0	1	0	0	0	0	0	0	0	0	0
2381-00445	jf	Texas	12	0	0	0	0	0	0	0	0	0	0	0	1	0	0	0	0	0	0	0	0	0
2381-00448	jf	Texas	12	0	0	0	0	0	0	0	0	0	0	0	1	0	0	0	0	0	0	0	0	0
2381-00449	jf	Texas	12	0	0	0	0	0	0	0	0	0	0	0	1	2	0	0	0	0	0	0	0	0
2381-00451	jf	Texas	12	0	0	0	0	0	0	0	0	0	0	0	1	0	0	0	0	0	0	0	0	0
2381-00452	jf	Texas	12	0	0	0	0	0	0	0	0	0	0	0	1	0	0	0	0	0	0	0	0	0
2381-00453	jf	Texas	12	0	0	0	0	0	0	0	0	0	0	0	1	0	0	0	0	0	0	0	0	0
2381-00455	jf	Texas	12	0	0	0	0	0	0	0	0	0	0	0	1	0	0	0	0	0	0	0	0	0
2381-00459	jf	Texas	12	0	0	0	0	0	0	0	0	0	0	0	1	0	0	0	0	0	0	0	0	0
2381-00460	jf	Texas	12	0	0	0	0	0	0	0	0	0	0	0	1	0	0	0	0	0	0	0	0	0
2381-00462	jf	Texas	12	0	0	0	0	0	0	0	0	0	0	0	1	0	0	0	0	0	0	0	0	0
2381-00464	jf	Texas	12	0	0	0	0	0	0	0	0	0	0	0	1	0	0	0	0	0	0	0	0	0
2381-00465	jf	Texas	12	0	0	0	0	0	0	0	0	0	0	0	1	0	0	0	0	0	0	0	0	0
2381-00466	jf	Texas	12	0	0	0	0	0	0	0	0	0	0	0	1	0	0	0	0	0	0	0	0	0
2381-00469	jf	Texas	12	0	0	0	0	0	0	0	0	0	0	0	1	0	0	0	0	0	0	0	0	0
2381-00470	jf	Texas	12	0	0	0	0	0	0	0	0	0	0	0	1	0	0	0	0	0	0	0	0	0
2381-00473	jf	Texas	12	0	0	0	0	0	0	0	0	0	0	0	1	0	0	0	0	0	0	0	0	0
2381-00476	jf	Texas	12	0	0	0	0	0	0	0	0	0	0	0	1	0	0	0	0	0	0	0	0	0
2381-00479	jf	Texas	12	0	0	0	0	0	0	0	0	0	0	0	1	0	0	0	0	0	0	0	0	0
2381-00485	jf	Texas	12	0	0	0	0	0	0	0	0	0	0	0	1	0	0	0	0	0	0	0	0	0
2381-00535	jf	Texas	16	0	0	0	0	0	0	0	0	0	0	0	0	0	0	0	1	0	0	0	0	0
2381-00541	jf	Texas	16	0	0	0	0	0	0	0	0	0	0	0	0	0	0	0	1	0	0	0	0	0
2381-00543	jf	Texas	16	0	0	0	0	0	0	0	0	0	0	0	0	0	0	0	1	0	0	0	0	0
2381-00550	jf	Texas	16	0	0	0	0	0	0	0	0	0	0	0	0	0	0	0	1	0	0	0	0	0
2381-00551	jf	Texas	16	0	0	0	0	0	0	0	0	0	0	0	0	0	0	0	1	0	0	0	0	0
2381-00552	jf	Texas	16	0	0	0	0	0	0	0	0	0	0	0	0	0	0	0	1	0	0	0	0	0
2381-00553	jf	Texas	16	0	0	0	0	0	0	0	0	0	0	0	0	0	0	0	1	0	0	0	0	0
2381-00554	jf	Texas	16	0	0	0	0	0	0	0	0	0	0	0	0	0	0	0	1	0	0	0	0	0
2381-00556	jf	Texas	16	0	0	0	0	0	0	0	0	0	0	0	0	0	0	0	1	0	0	0	0	0
2381-00558	jf	Texas	16	0	0	0	0	0	0	0	0	0	0	0	0	0	0	0	1	0	0	0	0	0
2381-00560	jf	Texas	16	0	0	0	0	0	0	0	0	0	0	0	0	0	0	0	1	0	0	0	0	0
2381-00561	jf	Texas	16	0	0	0	0	0	0	0	0	0	0	0	0	0	0	0	1	0	0	0	0	0
2381-00562	jf	Texas	16	0	0	0	0	0	0	0	0	0	0	0	0	0	0	0	1	0	0	0	0	0
2381-00563	jf	Texas	16	0	0	0	0	0	0	0	0	0	0	0	0	0	0	0	1	0	0	0	0	0
2381-00564	jf	Texas	16	0	0	0	0	0	0	0	0	0	0	0	0	0	0	0	1	0	0	0	0	0
2381-00565	jf	Texas	16	0	0	0	0	0	0	0	0	0	0	0	0	0	0	0	1	0	0	0	0	0
2381-08324	jf	Texas	17	0	0	0	0	0	0	0	0	0	0	0	0	0	0	0	0	1	0	0	0	0
2381-08389	jf	Texas	19	0	0	0	0	0	0	0	0	0	0	0	0	0	0	0	0	0	0	1	0	0
2381-11707	jf	Texas	19	0	0	0	0	0	0	0	0	0	0	0	0	0	0	0	0	0	0	1	0	0
2381-11902	jf	Texas	20	0	0	0	0	0	0	0	0	0	0	0	0	0	0	0	0	0	0	0	1	0
2381-11876	jf	Texas	21	0	0	0	0	0	0	0	0	0	0	0	0	0	0	0	0	0	0	0	0	1
2851-00805	jf	Texas	21	0	0	0	0	0	0	0	0	0	0	0	0	0	0	0	0	0	0	0	0	1
2851-00814	jf	Texas	21	0	0	0	0	0	0	0	0	0	0	0	0	0	0	0	0	0	0	0	0	1
2851-00815	jf	Texas	21	0	0	0	0	0	0	0	0	0	0	0	0	0	0	0	0	0	0	0	0	1
2851-00816	jf	Texas	21	0	0	0	0	0	0	0	0	0	0	0	0	0	0	0	0	0	0	0	0	1
8021-13135	jm	Texas	2	0	1	0	0	0	0	0	0	0	0	1	0	0	0	0	0	0	0	0	0	0
802113065	jm	Texas	2	0	1	0	0	0	0	0	0	0	0	0	0	0	0	0	0	0	0	0	0	0
802113069	jm	Texas	2	0	1	0	0	0	0	0	0	0	0	0	0	0	0	0	0	0	0	0	0	0
802113070	jm	Texas	2	0	1	0	0	0	0	0	0	0	0	0	0	0	0	0	0	0	0	0	0	0
802113077	jm	Texas	2	0	1	0	0	0	0	0	0	0	0	0	0	0	0	0	0	0	0	0	0	0
802113128	jm	Texas	2	0	1	2	0	0	0	0	0	0	0	0	0	0	0	0	0	0	0	0	0	0
802113129	jm	Texas	2	0	1	2	0	0	0	0	0	0	0	0	0	0	0	0	0	0	0	0	0	0
802113130	jm	Texas	2	0	1	2	0	0	0	0	0	0	0	0	0	0	0	0	0	0	0	0	0	0
802113131	jm	Texas	2	0	1	2	0	0	0	0	0	0	0	0	0	0	0	0	0	0	0	0	0	0
802113132	jm	Texas	2	0	1	0	0	0	0	0	0	0	0	0	0	0	0	0	0	0	0	0	0	0
802113133	jm	Texas	2	0	1	0	0	0	0	0	0	0	0	0	0	0	0	0	0	0	0	0	0	0
802113135	jm	Texas	2	0	1	2	0	0	0	0	0	0	0	0	2	2	0	0	0	0	0	0	0	0
802113136	jm	Texas	2	0	1	2	0	0	0	0	0	0	0	0	0	0	0	0	0	0	0	0	0	0
802113138	jm	Texas	2	0	1	2	0	0	0	0	0	0	0	0	0	0	0	0	0	0	0	0	0	0
802113139	jm	Texas	2	0	1	0	0	0	0	0	0	0	0	0	0	0	0	0	0	0	0	0	0	0
802113140	jm	Texas	2	0	1	0	0	0	0	0	0	0	0	0	0	0	0	0	0	0	0	0	0	0
802113143	jm	Texas	2	0	1	2	0	0	0	0	0	0	0	0	0	0	0	0	0	0	0	0	0	0
802113146	jm	Texas	2	0	1	0	0	0	0	0	0	0	0	0	0	0	0	0	0	0	0	0	0	0
802113153	jm	Texas	2	0	1	0	0	0	0	0	0	0	0	0	0	0	0	0	0	0	0	0	0	0
802113154	jm	Texas	2	0	1	0	0	0	0	0	0	0	0	0	0	0	0	0	0	0	0	0	0	0
802113155	jm	Texas	2	0	1	0	0	0	0	0	0	0	0	0	0	0	0	0	0	0	0	0	0	0
802113157	jm	Texas	2	0	1	0	0	0	0	0	0	0	0	0	0	0	0	0	0	0	0	0	0	0
802113158	jm	Texas	2	0	1	0	0	0	0	0	0	0	0	0	0	0	0	0	0	0	0	0	0	0
802113161	jm	Texas	2	0	1	0	0	0	0	0	0	0	0	0	0	0	0	0	0	0	0	0	0	0
802113166	jm	Texas	2	0	1	0	0	0	0	0	0	0	0	0	0	0	0	0	0	0	0	0	0	0
802113167	jm	Texas	2	0	1	0	0	0	0	0	0	0	0	0	0	0	0	0	0	0	0	0	0	0
802113168	jm	Texas	2	0	1	0	0	0	0	0	0	0	0	0	0	0	0	0	0	0	0	0	0	0
802113169	jm	Texas	2	0	1	2	0	0	0	0	0	0	0	0	0	0	0	0	0	0	0	0	0	0
802113170	jm	Texas	2	0	1	0	0	0	0	0	0	0	0	0	0	0	0	0	0	0	0	0	0	0
802113172	jm	Texas	2	0	1	0	0	0	0	0	0	0	0	0	0	0	0	0	0	0	0	0	0	0
802113178	jm	Texas	2	0	1	0	0	0	0	0	0	0	0	0	0	0	0	0	0	0	0	0	0	0
802113179	jm	Texas	2	0	1	0	0	0	0	0	0	0	0	0	0	0	0	0	0	0	0	0	0	0
802113180	jm	Texas	2	0	1	0	0	0	0	0	0	0	0	0	0	0	0	0	0	0	0	0	0	0
802113181	jm	Texas	2	0	1	0	0	0	0	0	0	0	0	0	0	0	0	0	0	0	0	0	0	0
802113183	jm	Texas	2	0	1	0	0	0	0	0	0	0	0	0	0	0	0	0	0	0	0	0	0	0
802113184	jm	Texas	2	0	1	0	0	0	0	0	0	0	0	0	0	0	0	0	0	0	0	0	0	0
802113185	jm	Texas	2	0	1	0	0	0	0	0	0	0	0	0	0	0	0	0	0	0	0	0	0	0
802113187	jm	Texas	2	0	1	0	0	0	0	0	0	0	0	0	0	0	0	0	0	0	0	0	0	0
802113188	jm	Texas	2	0	1	2	0	0	0	0	0	0	0	0	2	2	0	0	0	0	0	0	0	0
802113196	jm	Texas	2	0	1	0	0	0	0	0	0	0	0	0	0	0	0	0	0	0	0	0	0	0
802113201	jm	Texas	2	0	1	0	0	0	0	0	0	0	0	0	0	0	0	0	0	0	0	0	0	0
802113203	jm	Texas	2	0	1	0	0	0	0	0	0	0	0	0	0	0	0	0	0	0	0	0	0	0
802113204	jm	Texas	3	0	0	1	0	0	0	0	0	0	0	0	0	0	0	0	0	0	0	0	0	0
802113205	jm	Texas	3	0	0	1	0	0	0	0	0	0	0	0	0	0	0	0	0	0	0	0	0	0
802113206	jm	Texas	3	0	0	1	0	0	0	0	0	0	0	0	0	0	0	0	0	0	0	0	0	0
802113222	jm	Texas	3	0	0	1	0	0	0	0	0	0	0	0	0	0	0	0	0	0	0	0	0	0
802113228	jm	Texas	3	0	0	1	0	0	0	0	0	0	0	0	0	0	0	0	0	0	0	0	0	0
802113230	jm	Texas	3	0	0	1	0	0	0	0	0	0	0	0	0	0	0	0	0	0	0	0	0	0
802113231	jm	Texas	3	0	0	1	0	0	0	0	0	0	0	0	0	0	0	0	0	0	0	0	0	0
802113232	jm	Texas	3	0	0	1	0	0	0	0	0	0	0	0	0	0	0	0	0	0	0	0	0	0
802113233	jm	Texas	3	0	0	1	0	0	0	0	0	0	0	0	0	0	0	0	0	0	0	0	0	0
802113238	jm	Texas	3	0	0	1	0	0	0	0	0	0	0	0	0	0	0	0	0	0	0	0	0	0
802113245	jm	Texas	3	0	0	1	0	0	0	0	0	0	0	0	0	0	0	0	0	0	0	0	0	0
802113246	jm	Texas	3	0	0	1	0	0	0	0	0	0	0	0	0	0	0	0	0	0	0	0	0	0
802113247	jm	Texas	3	0	0	1	0	0	0	0	0	0	0	0	0	0	0	0	0	0	0	0	0	0
802113248	jm	Texas	3	0	0	1	0	0	0	0	0	0	0	0	0	0	0	0	0	0	0	0	0	0
802113249	jm	Texas	3	0	0	1	0	0	0	0	0	0	0	0	0	0	0	0	0	0	0	0	0	0
802113251	jm	Texas	3	0	0	1	0	0	0	0	0	0	0	0	0	0	0	0	0	0	0	0	0	0
802113254	jm	Texas	3	0	0	1	0	0	0	0	0	0	0	0	0	0	0	0	0	0	0	0	0	0
802113255	jm	Texas	3	0	0	1	0	0	0	0	0	0	0	0	0	0	0	0	0	0	0	0	0	0
802113258	jm	Texas	3	0	0	1	0	0	0	0	0	0	0	0	0	0	0	0	0	0	0	0	0	0
802113261	jm	Texas	3	0	0	1	0	0	0	0	0	0	0	0	0	0	0	0	0	0	0	0	0	0
802113262	jm	Texas	3	0	0	1	0	0	0	0	0	0	0	0	0	0	0	0	0	0	0	0	0	0
802113264	jm	Texas	3	0	0	1	0	0	0	0	0	0	0	0	0	0	0	0	0	0	0	0	0	0
802113265	jm	Texas	3	0	0	1	0	0	0	0	0	0	0	0	0	0	0	0	0	0	0	0	0	0
802113266	jm	Texas	3	0	0	1	0	0	0	0	0	0	0	0	0	0	0	0	0	0	0	0	0	0
802113268	jm	Texas	3	0	0	1	0	0	0	0	0	0	0	0	0	0	0	0	0	0	0	0	0	0
802113269	jm	Texas	3	0	0	1	0	0	0	0	0	0	0	0	0	0	0	0	0	0	0	0	0	0
802113275	jm	Texas	3	0	0	1	0	0	0	0	0	0	0	0	0	0	0	0	0	0	0	0	0	0
802113276	jm	Texas	3	0	0	1	0	0	0	0	0	0	0	0	0	0	0	0	0	0	0	0	0	0
802113280	jm	Texas	3	0	0	1	0	0	0	0	0	0	0	0	0	0	0	0	0	0	0	0	0	0
802113285	jm	Texas	3	0	0	1	0	0	0	0	0	0	0	0	0	0	0	0	0	0	0	0	0	0
802113286	jm	Texas	3	0	0	1	0	0	0	0	0	0	0	0	0	0	0	0	0	0	0	0	0	0
802113288	jm	Texas	3	0	0	1	0	0	0	0	0	0	0	0	0	0	0	0	0	0	0	0	0	0
802113289	jm	Texas	3	0	0	1	0	0	0	0	0	0	0	0	0	0	0	0	0	0	0	0	0	0
802113290	jm	Texas	3	0	0	1	0	0	0	0	0	0	0	0	0	0	0	0	0	0	0	0	0	0
802113293	jm	Texas	3	0	0	1	0	0	0	0	0	0	0	0	0	0	0	0	0	0	0	0	0	0
802113295	jm	Texas	3	0	0	1	0	0	0	0	0	0	0	0	0	0	0	0	0	0	0	0	0	0
802113296	jm	Texas	3	0	0	1	0	0	0	0	0	0	0	0	0	0	0	0	0	0	0	0	0	0
802113297	jm	Texas	3	0	0	1	0	0	0	0	0	0	0	0	0	0	0	0	0	0	0	0	0	0
802113298	jm	Texas	3	0	0	1	0	0	0	0	0	0	0	0	0	0	0	0	0	0	0	0	0	0
802113299	jm	Texas	3	0	0	1	0	0	0	0	0	0	0	0	0	0	0	0	0	0	0	0	0	0
802113300	jm	Texas	3	0	0	1	0	0	0	0	0	0	0	0	0	0	0	0	0	0	0	0	0	0
802113301	jm	Texas	3	0	0	1	0	0	0	0	0	0	0	0	0	0	0	0	0	0	0	0	0	0
802113302	jm	Texas	3	0	0	1	0	0	0	0	0	0	0	0	0	0	0	0	0	0	0	0	0	0
802113304	jm	Texas	3	0	0	1	0	0	0	0	0	0	0	0	0	0	0	0	0	0	0	0	0	0
802113306	jm	Texas	3	0	0	1	0	0	0	0	0	0	0	0	0	0	0	0	0	0	0	0	0	0
802113308	jm	Texas	3	0	0	1	0	0	0	0	0	0	0	0	0	0	0	0	0	0	0	0	0	0
802113309	jm	Texas	3	0	0	1	0	0	0	0	0	0	0	0	0	0	0	0	0	0	0	0	0	0
802113311	jm	Texas	3	0	0	1	0	0	0	0	0	0	0	0	0	0	0	0	0	0	0	0	0	0
802113313	jm	Texas	3	0	0	1	0	0	0	0	0	0	0	0	0	0	0	0	0	0	0	0	0	0
802113314	jm	Texas	3	0	0	1	0	0	0	0	0	0	0	0	0	0	0	0	0	0	0	0	0	0
802113315	jm	Texas	3	0	0	1	0	0	0	0	0	0	0	0	0	0	0	0	0	0	0	0	0	0
802113318	jm	Texas	3	0	0	1	0	0	0	0	0	0	0	0	0	0	0	0	0	0	0	0	0	0
802113320	jm	Texas	3	0	0	1	0	0	0	0	0	0	0	0	0	0	0	0	0	0	0	0	0	0
802113324	jm	Texas	3	0	0	1	0	0	0	0	0	0	0	0	0	0	0	0	0	0	0	0	0	0
802113325	jm	Texas	3	0	0	1	0	0	0	0	0	0	0	0	0	0	0	0	0	0	0	0	0	0
802113326	jm	Texas	3	0	0	1	0	0	0	0	0	0	0	0	0	0	0	0	0	0	0	0	0	0
802113330	jm	Texas	3	0	0	1	0	0	0	0	0	0	0	0	0	0	0	0	0	0	0	0	0	0
802113332	jm	Texas	3	0	0	1	0	0	0	0	0	0	0	0	0	0	0	0	0	0	0	0	0	0
802113334	jm	Texas	3	0	0	1	0	0	0	0	0	0	0	0	0	0	0	0	0	0	0	0	0	0
802113336	jm	Texas	3	0	0	1	0	0	0	0	0	0	0	0	0	0	0	0	0	0	0	0	0	0
802113337	jm	Texas	3	0	0	1	0	0	0	0	0	0	0	0	0	0	0	0	0	0	0	0	0	0
802113338	jm	Texas	3	0	0	1	0	0	0	0	0	0	0	0	0	0	0	0	0	0	0	0	0	0
2381-00309	jm	Texas	11	0	0	0	0	0	0	0	0	0	0	1	0	0	0	0	0	0	0	0	0	0
2381-00310	jm	Texas	11	0	0	0	0	0	0	0	0	0	0	1	0	0	0	0	0	0	0	0	0	0
2381-00318	jm	Texas	11	0	0	0	0	0	0	0	0	0	0	1	0	0	0	0	0	0	0	0	0	0
2381-00319	jm	Texas	11	0	0	0	0	0	0	0	0	0	0	1	0	0	0	0	0	0	0	0	0	0
2381-00320	jm	Texas	11	0	0	0	0	0	0	0	0	0	0	1	0	0	0	0	0	0	0	0	0	0
2381-00324	jm	Texas	11	0	0	0	0	0	0	0	0	0	0	1	0	0	0	0	0	0	0	0	0	0
2381-00337	jm	Texas	11	0	0	0	0	0	0	0	0	0	0	1	0	0	0	0	0	0	0	0	0	0
2381-00338	jm	Texas	11	0	0	0	0	0	0	0	0	0	0	1	0	0	0	0	0	0	0	0	0	0
2381-00345	jm	Texas	11	0	0	0	0	0	0	0	0	0	0	1	0	0	0	0	0	0	0	0	0	0
2381-00346	jm	Texas	11	0	0	0	0	0	0	0	0	0	0	1	0	0	0	0	0	0	0	0	0	0
2381-00353	jm	Texas	11	0	0	0	0	0	0	0	0	0	0	1	0	0	0	0	0	0	0	0	0	0
2381-00355	jm	Texas	11	0	0	0	0	0	0	0	0	0	0	1	0	0	0	0	0	0	0	0	0	0
2381-00359	jm	Texas	11	0	0	0	0	0	0	0	0	0	0	1	2	2	0	0	0	0	0	0	0	0
2381-00362	jm	Texas	11	0	0	0	0	0	0	0	0	0	0	1	0	0	0	0	0	0	0	0	0	0
2381-00363	jm	Texas	11	0	0	0	0	0	0	0	0	0	0	1	0	0	0	0	0	0	0	0	0	0
2381-00369	jm	Texas	11	0	0	0	0	0	0	0	0	0	0	1	2	0	0	0	0	0	0	0	0	0
2381-00370	jm	Texas	11	0	0	0	0	0	0	0	0	0	0	1	0	0	0	0	0	0	0	0	0	0
2381-00373	jm	Texas	11	0	0	0	0	0	0	0	0	0	0	1	0	0	0	0	0	0	0	0	0	0
2381-00374	jm	Texas	11	0	0	0	0	0	0	0	0	0	0	1	0	0	0	0	0	0	0	0	0	0
2381-00378	jm	Texas	11	0	0	0	0	0	0	0	0	0	0	1	0	0	0	0	0	0	0	0	0	0
2381-00395	jm	Texas	12	0	0	0	0	0	0	0	0	0	0	0	1	0	0	0	0	0	0	0	0	0
2381-00397	jm	Texas	12	0	0	0	0	0	0	0	0	0	0	0	1	0	0	0	0	0	0	0	0	0
2381-00398	jm	Texas	12	0	0	0	0	0	0	0	0	0	0	0	1	0	0	0	0	0	0	0	0	0
2381-00400	jm	Texas	12	0	0	0	0	0	0	0	0	0	0	0	1	0	0	0	0	0	0	0	0	0
2381-00401	jm	Texas	12	0	0	0	0	0	0	0	0	0	0	0	1	0	0	0	0	0	0	0	0	0
2381-00407	jm	Texas	12	0	0	0	0	0	0	0	0	0	0	0	1	0	0	0	0	0	0	0	0	0
2381-00409	jm	Texas	12	0	0	0	0	0	0	0	0	0	0	0	1	0	0	0	0	0	0	0	0	0
2381-00410	jm	Texas	12	0	0	0	0	0	0	0	0	0	0	0	1	0	0	0	0	0	0	0	0	0
2381-00412	jm	Texas	12	0	0	0	0	0	0	0	0	0	0	0	1	0	0	0	0	0	0	0	0	0
2381-00413	jm	Texas	12	0	0	0	0	0	0	0	0	0	0	0	1	0	0	0	0	0	0	0	0	0
2381-00416	jm	Texas	12	0	0	0	0	0	0	0	0	0	0	0	1	0	0	0	0	0	0	0	0	0
2381-00418	jm	Texas	12	0	0	0	0	0	0	0	0	0	0	0	1	0	0	0	0	0	0	0	0	0
2381-00420	jm	Texas	12	0	0	0	0	0	0	0	0	0	0	0	1	0	0	0	0	0	0	0	0	0
2381-00428	jm	Texas	12	0	0	0	0	0	0	0	0	0	0	0	1	0	0	0	0	0	0	0	0	0
2381-00432	jm	Texas	12	0	0	0	0	0	0	0	0	0	0	0	1	0	0	0	0	0	0	0	0	0
2381-00433	jm	Texas	12	0	0	0	0	0	0	0	0	0	0	0	1	0	0	0	0	0	0	0	0	0
2381-00436	jm	Texas	12	0	0	0	0	0	0	0	0	0	0	0	1	0	0	0	0	0	0	0	0	0
2381-00446	jm	Texas	12	0	0	0	0	0	0	0	0	0	0	0	1	2	0	0	0	0	0	0	0	0
2381-00450	jm	Texas	12	0	0	0	0	0	0	0	0	0	0	0	1	2	0	0	0	0	0	0	0	0
2381-00454	jm	Texas	12	0	0	0	0	0	0	0	0	0	0	0	1	0	0	0	0	0	0	0	0	0
2381-00456	jm	Texas	12	0	0	0	0	0	0	0	0	0	0	0	1	0	0	0	0	0	0	0	0	0
2381-00457	jm	Texas	12	0	0	0	0	0	0	0	0	0	0	0	1	0	0	0	0	0	0	0	0	0
2381-00458	jm	Texas	12	0	0	0	0	0	0	0	0	0	0	0	1	0	0	0	0	0	0	0	0	0
2381-00461	jm	Texas	12	0	0	0	0	0	0	0	0	0	0	0	1	0	0	0	0	0	0	0	0	0
2381-00463	jm	Texas	12	0	0	0	0	0	0	0	0	0	0	0	1	2	0	0	0	0	0	0	0	0
2381-00467	jm	Texas	12	0	0	0	0	0	0	0	0	0	0	0	1	0	0	0	0	0	0	0	0	0
2381-00468	jm	Texas	12	0	0	0	0	0	0	0	0	0	0	0	1	0	0	0	0	0	0	0	0	0
2381-00471	jm	Texas	12	0	0	0	0	0	0	0	0	0	0	0	1	0	0	0	0	0	0	0	0	0
2381-00472	jm	Texas	12	0	0	0	0	0	0	0	0	0	0	0	1	0	0	0	0	0	0	0	0	0
2381-00474	jm	Texas	12	0	0	0	0	0	0	0	0	0	0	0	1	0	0	0	0	0	0	0	0	0
2381-00475	jm	Texas	12	0	0	0	0	0	0	0	0	0	0	0	1	0	0	0	0	0	0	0	0	0
2381-00477	jm	Texas	12	0	0	0	0	0	0	0	0	0	0	0	1	0	0	0	0	0	0	0	0	0
2381-00478	jm	Texas	12	0	0	0	0	0	0	0	0	0	0	0	1	0	0	0	0	0	0	0	0	0
2381-00480	jm	Texas	12	0	0	0	0	0	0	0	0	0	0	0	1	0	0	0	0	0	0	0	0	0
2381-00481	jm	Texas	12	0	0	0	0	0	0	0	0	0	0	0	1	0	0	0	0	0	0	0	0	0
2381-00482	jm	Texas	12	0	0	0	0	0	0	0	0	0	0	0	1	0	0	0	0	0	0	0	0	0
2381-00483	jm	Texas	12	0	0	0	0	0	0	0	0	0	0	0	1	2	0	0	0	0	0	0	0	0
2381-00484	jm	Texas	12	0	0	0	0	0	0	0	0	0	0	0	1	0	0	0	0	0	0	0	0	0
2381-00486	jm	Texas	12	0	0	0	0	0	0	0	0	0	0	0	1	0	0	0	0	0	0	0	0	0
2381-00487	jm	Texas	12	0	0	0	0	0	0	0	0	0	0	0	1	0	0	0	0	0	0	0	0	0
2381-00534	jm	Texas	16	0	0	0	0	0	0	0	0	0	0	0	0	0	0	0	1	0	0	0	0	0
2381-00536	jm	Texas	16	0	0	0	0	0	0	0	0	0	0	0	0	0	0	0	1	0	0	0	0	0
2381-00537	jm	Texas	16	0	0	0	0	0	0	0	0	0	0	0	0	0	0	0	1	0	0	0	0	0
2381-00539	jm	Texas	16	0	0	0	0	0	0	0	0	0	0	0	0	0	0	0	1	0	0	0	0	0
2381-00545	jm	Texas	16	0	0	0	0	0	0	0	0	0	0	0	0	0	0	0	1	0	0	0	0	0
2381-00548	jm	Texas	16	0	0	0	0	0	0	0	0	0	0	0	0	0	0	0	1	0	0	0	0	0
2381-00557	jm	Texas	16	0	0	0	0	0	0	0	0	0	0	0	0	0	0	0	1	0	0	0	0	0
2381-00566	jm	Texas	16	0	0	0	0	0	0	0	0	0	0	0	0	0	0	0	1	0	0	0	0	0
2381-08322	jm	Texas	17	0	0	0	0	0	0	0	0	0	0	0	0	0	0	0	0	1	0	0	0	0
2381-08323	jm	Texas	17	0	0	0	0	0	0	0	0	0	0	0	0	0	0	0	0	1	0	0	0	0
2381-08390	jm	Texas	19	0	0	0	0	0	0	0	0	0	0	0	0	0	0	0	0	0	0	1	0	0
2381-08391	jm	Texas	19	0	0	0	0	0	0	0	0	0	0	0	0	0	0	0	0	0	0	1	0	0
2381-11877	jm	Texas	21	0	0	0	0	0	0	0	0	0	0	0	0	0	0	0	0	0	0	0	0	1
2381-11883	jm	Texas	21	0	0	0	0	0	0	0	0	0	0	0	0	0	0	0	0	0	0	0	0	1
2851-00817	jm	Texas	21	0	0	0	0	0	0	0	0	0	0	0	0	0	0	0	0	0	0	0	0	1
802113194	ju	Texas	2	0	1	0	0	0	0	0	0	0	0	0	0	0	0	0	0	0	0	0	0	0
2381-00512	ju	Texas	16	0	0	0	0	0	0	0	0	0	0	0	0	0	0	0	1	0	0	0	0	0
2381-00538	ju	Texas	16	0	0	0	0	0	0	0	0	0	0	0	0	0	0	0	1	0	0	0	0	0
2381-00540	ju	Texas	16	0	0	0	0	0	0	0	0	0	0	0	0	0	0	0	1	0	0	0	0	0
2381-00555	ju	Texas	16	0	0	0	0	0	0	0	0	0	0	0	0	0	0	0	1	0	0	0	0	0
2381-00559	ju	Texas	16	0	0	0	0	0	0	0	0	0	0	0	0	0	0	0	1	0	0	0	0	0
2381-08312	ju	Texas	17	0	0	0	0	0	0	0	0	0	0	0	0	0	0	0	0	1	0	0	0	0
2381-11904	ju	Texas	20	0	0	0	0	0	0	0	0	0	0	0	0	0	0	0	0	0	0	0	1	0
2381-11936	ju	Texas	20	0	0	0	0	0	0	0	0	0	0	0	0	0	0	0	0	0	0	0	1	0
2381-11882	ju	Texas	21	0	0	0	0	0	0	0	0	0	0	0	0	0	0	0	0	0	0	0	0	1
2851-00812	ju	Texas	21	0	0	0	0	0	0	0	0	0	0	0	0	0	0	0	0	0	0	0	0	1
