# Supplementary material for: Integrated population modelling reveals potential drivers of demography from partially aligned data: a case study of snowy plover declines under human stressors
Source: PeerJ. 2021 Nov 15;9:e12475. doi: 10.7717/peerj.12475 (PMC8601057; doi:10.7717/peerj.12475)
Supplement: Supplemental Information 6 — year: the year in which the survey was conducted region: region of the survey, Texas, New Mexico, or Oklahoma clutch: clutch size, 1, 2, or 3 fate: clutch fate [file peerj-09-12475-s006.csv]

year	region	clutch	fate
1999	Texas	2	0
1999	Texas	2	0
1999	Texas	2	0
1999	Texas	2	0
1999	Texas	2	0
1999	Texas	2	0
1999	Texas	2	0
1999	Texas	2	0
1999	Texas	2	0
1999	Texas	2	1
1999	Texas	2	1
1999	Texas	2	1
1999	Texas	2	1
1999	Texas	2	1
1999	Texas	3	0
1999	Texas	3	0
1999	Texas	3	0
1999	Texas	3	0
1999	Texas	3	0
1999	Texas	3	0
1999	Texas	3	0
1999	Texas	3	0
1999	Texas	3	0
1999	Texas	3	0
1999	Texas	3	0
1999	Texas	3	0
1999	Texas	3	0
1999	Texas	3	0
1999	Texas	3	0
1999	Texas	3	0
1999	Texas	3	0
1999	Texas	3	0
1999	Texas	3	0
1999	Texas	3	0
1999	Texas	3	0
1999	Texas	3	0
1999	Texas	3	1
1999	Texas	3	1
1999	Texas	3	1
1999	Texas	3	1
1999	Texas	3	1
1999	Texas	3	1
1999	Texas	3	1
1999	Texas	3	1
1999	Texas	3	1
1999	Texas	3	1
1999	Texas	3	1
1999	Texas	3	1
1999	Texas	3	1
1999	Texas	3	1
1999	Texas	3	1
1999	Texas	3	1
1999	Texas	3	1
1999	Texas	3	1
1999	Texas	3	1
1999	Texas	3	1
1999	Texas	3	1
1999	Texas	3	1
1999	Texas	3	1
1999	Texas	3	1
1999	Texas	3	1
1999	Texas	3	1
1999	Texas	3	1
1999	Texas	3	1
1999	Texas	3	1
1999	Texas	3	1
1999	Texas	3	1
1999	Texas	3	1
1999	Texas	3	1
1999	Texas	3	1
1999	Texas	3	1
1999	Texas	3	1
1999	Texas	3	1
1999	Texas	3	1
1999	Texas	3	1
2000	Texas	2	0
2000	Texas	2	1
2000	Texas	3	0
2000	Texas	3	0
2000	Texas	3	0
2000	Texas	3	0
2000	Texas	3	0
2000	Texas	3	0
2000	Texas	3	0
2000	Texas	3	0
2000	Texas	3	0
2000	Texas	3	0
2000	Texas	3	0
2000	Texas	3	0
2000	Texas	3	1
2000	Texas	3	1
2000	Texas	3	1
2000	Texas	3	1
2000	Texas	3	1
2000	Texas	3	1
2000	Texas	3	1
2000	Texas	3	1
2000	Texas	3	1
2000	Texas	3	1
2000	Texas	3	1
2000	Texas	3	1
2000	Texas	3	1
2000	Texas	3	1
2000	Texas	3	1
2000	Texas	3	1
2000	Texas	3	1
2000	Texas	3	1
2000	Texas	3	1
2000	Texas	3	1
2000	Texas	3	1
2000	Texas	3	1
2000	Texas	3	1
2000	Texas	3	1
2000	Texas	3	1
2000	Texas	3	1
2000	Texas	3	1
2000	Texas	3	1
2000	Texas	3	1
2000	Texas	3	1
2000	Texas	3	1
2000	Texas	3	1
2000	Texas	3	1
2000	Texas	3	1
2000	Texas	3	1
2000	Texas	3	1
2000	Texas	3	1
2000	Texas	3	1
2000	Texas	3	1
2000	Texas	3	1
2000	Texas	3	1
2000	Texas	3	1
2000	Texas	3	1
2000	Texas	3	1
2000	Texas	3	1
2000	Texas	3	1
2000	Texas	3	1
2008	Texas	1	0
2008	Texas	1	0
2008	Texas	1	0
2008	Texas	1	0
2008	Texas	1	0
2008	Texas	1	0
2008	Texas	1	0
2008	Texas	1	0
2008	Texas	1	0
2008	Texas	1	0
2008	Texas	1	0
2008	Texas	1	0
2008	Texas	1	0
2008	Texas	1	0
2008	Texas	1	0
2008	Texas	1	0
2008	Texas	1	0
2008	Texas	1	0
2008	Texas	1	0
2008	Texas	1	0
2008	Texas	1	0
2008	Texas	1	0
2008	Texas	1	0
2008	Texas	1	0
2008	Texas	1	1
2008	Texas	1	1
2008	Texas	2	0
2008	Texas	2	0
2008	Texas	2	0
2008	Texas	2	0
2008	Texas	2	0
2008	Texas	2	0
2008	Texas	2	0
2008	Texas	2	0
2008	Texas	2	0
2008	Texas	2	0
2008	Texas	2	0
2008	Texas	2	0
2008	Texas	2	0
2008	Texas	2	0
2008	Texas	2	0
2008	Texas	2	0
2008	Texas	2	1
2008	Texas	2	1
2008	Texas	2	1
2008	Texas	2	1
2008	Texas	2	1
2008	Texas	2	1
2008	Texas	3	0
2008	Texas	3	0
2008	Texas	3	0
2008	Texas	3	0
2008	Texas	3	0
2008	Texas	3	0
2008	Texas	3	0
2008	Texas	3	0
2008	Texas	3	0
2008	Texas	3	0
2008	Texas	3	0
2008	Texas	3	0
2008	Texas	3	0
2008	Texas	3	0
2008	Texas	3	0
2008	Texas	3	0
2008	Texas	3	1
2008	Texas	3	1
2008	Texas	3	1
2008	Texas	3	1
2008	Texas	3	1
2008	Texas	3	1
2008	Texas	3	1
2008	Texas	3	1
2008	Texas	3	1
2008	Texas	3	1
2008	Texas	3	1
2008	Texas	3	1
2008	Texas	3	1
2008	Texas	3	1
2008	Texas	3	1
2009	Texas	1	0
2009	Texas	1	0
2009	Texas	1	0
2009	Texas	1	0
2009	Texas	1	0
2009	Texas	1	0
2009	Texas	1	0
2009	Texas	1	0
2009	Texas	1	0
2009	Texas	1	0
2009	Texas	1	0
2009	Texas	1	0
2009	Texas	1	0
2009	Texas	1	0
2009	Texas	1	0
2009	Texas	1	0
2009	Texas	1	0
2009	Texas	1	0
2009	Texas	1	0
2009	Texas	1	0
2009	Texas	1	0
2009	Texas	1	0
2009	Texas	1	0
2009	Texas	1	0
2009	Texas	1	0
2009	Texas	1	0
2009	Texas	1	0
2009	Texas	1	0
2009	Texas	1	0
2009	Texas	1	0
2009	Texas	1	0
2009	Texas	1	0
2009	Texas	1	0
2009	Texas	1	1
2009	Texas	1	1
2009	Texas	2	0
2009	Texas	2	0
2009	Texas	2	0
2009	Texas	2	0
2009	Texas	2	0
2009	Texas	2	0
2009	Texas	2	0
2009	Texas	2	0
2009	Texas	2	0
2009	Texas	2	0
2009	Texas	2	0
2009	Texas	2	0
2009	Texas	2	0
2009	Texas	2	0
2009	Texas	2	0
2009	Texas	2	0
2009	Texas	2	0
2009	Texas	2	0
2009	Texas	2	0
2009	Texas	2	0
2009	Texas	2	0
2009	Texas	2	0
2009	Texas	2	1
2009	Texas	2	1
2009	Texas	2	1
2009	Texas	2	1
2009	Texas	2	1
2009	Texas	2	1
2009	Texas	3	0
2009	Texas	3	0
2009	Texas	3	0
2009	Texas	3	0
2009	Texas	3	0
2009	Texas	3	0
2009	Texas	3	0
2009	Texas	3	0
2009	Texas	3	0
2009	Texas	3	0
2009	Texas	3	0
2009	Texas	3	0
2009	Texas	3	0
2009	Texas	3	0
2009	Texas	3	0
2009	Texas	3	0
2009	Texas	3	0
2009	Texas	3	0
2009	Texas	3	0
2009	Texas	3	0
2009	Texas	3	0
2009	Texas	3	0
2009	Texas	3	0
2009	Texas	3	0
2009	Texas	3	0
2009	Texas	3	0
2009	Texas	3	0
2009	Texas	3	0
2009	Texas	3	0
2009	Texas	3	0
2009	Texas	3	0
2009	Texas	3	1
2009	Texas	3	1
2009	Texas	3	1
2009	Texas	3	1
2009	Texas	3	1
2009	Texas	3	1
2009	Texas	3	1
2009	Texas	3	1
2009	Texas	3	1
2009	Texas	3	1
2009	Texas	3	1
2009	Texas	3	1
2009	Texas	3	1
2009	Texas	3	1
2009	Texas	3	1
2009	Texas	3	1
2009	Texas	3	1
2009	Texas	3	1
2009	Texas	3	1
2009	Texas	3	1
2009	Texas	3	1
2009	Texas	3	1
2009	Texas	3	1
2009	Texas	3	1
2009	Texas	3	1
2009	Texas	3	1
2009	Texas	3	1
2009	Texas	3	1
2017	New Mexico	1	0
2017	New Mexico	1	0
2017	New Mexico	2	0
2017	New Mexico	2	0
2017	New Mexico	2	0
2017	New Mexico	2	0
2017	New Mexico	3	0
2017	New Mexico	3	0
2017	New Mexico	3	0
2017	New Mexico	3	0
2017	New Mexico	3	0
2017	New Mexico	3	0
2017	New Mexico	3	0
2017	Oklahoma	1	0
2017	Oklahoma	1	0
2017	Oklahoma	1	0
2017	Oklahoma	1	0
2017	Oklahoma	1	0
2017	Oklahoma	1	0
2017	Oklahoma	1	0
2017	Oklahoma	1	0
2017	Oklahoma	1	0
2017	Oklahoma	1	0
2017	Oklahoma	1	0
2017	Oklahoma	1	0
2017	Oklahoma	1	0
2017	Oklahoma	1	0
2017	Oklahoma	1	0
2017	Oklahoma	1	0
2017	Oklahoma	1	0
2017	Oklahoma	1	0
2017	Oklahoma	1	0
2017	Oklahoma	1	0
2017	Oklahoma	1	0
2017	Oklahoma	1	0
2017	Oklahoma	1	0
2017	Oklahoma	1	0
2017	Oklahoma	1	0
2017	Oklahoma	1	0
2017	Oklahoma	1	0
2017	Oklahoma	1	0
2017	Oklahoma	1	0
2017	Oklahoma	1	0
2017	Oklahoma	1	0
2017	Oklahoma	1	0
2017	Oklahoma	1	0
2017	Oklahoma	1	0
2017	Oklahoma	1	0
2017	Oklahoma	1	0
2017	Oklahoma	1	0
2017	Oklahoma	1	0
2017	Oklahoma	1	1
2017	Oklahoma	2	0
2017	Oklahoma	2	0
2017	Oklahoma	2	0
2017	Oklahoma	2	0
2017	Oklahoma	2	0
2017	Oklahoma	2	0
2017	Oklahoma	2	0
2017	Oklahoma	2	0
2017	Oklahoma	2	0
2017	Oklahoma	2	0
2017	Oklahoma	2	0
2017	Oklahoma	2	0
2017	Oklahoma	2	0
2017	Oklahoma	2	0
2017	Oklahoma	2	0
2017	Oklahoma	2	0
2017	Oklahoma	2	0
2017	Oklahoma	2	0
2017	Oklahoma	2	0
2017	Oklahoma	2	0
2017	Oklahoma	2	0
2017	Oklahoma	2	0
2017	Oklahoma	2	0
2017	Oklahoma	2	0
2017	Oklahoma	2	0
2017	Oklahoma	2	0
2017	Oklahoma	2	0
2017	Oklahoma	2	0
2017	Oklahoma	2	0
2017	Oklahoma	2	0
2017	Oklahoma	2	0
2017	Oklahoma	2	0
2017	Oklahoma	2	0
2017	Oklahoma	2	0
2017	Oklahoma	2	0
2017	Oklahoma	2	0
2017	Oklahoma	2	0
2017	Oklahoma	2	0
2017	Oklahoma	2	1
2017	Oklahoma	2	1
2017	Oklahoma	3	0
2017	Oklahoma	3	0
2017	Oklahoma	3	0
2017	Oklahoma	3	0
2017	Oklahoma	3	0
2017	Oklahoma	3	0
2017	Oklahoma	3	0
2017	Oklahoma	3	0
2017	Oklahoma	3	0
2017	Oklahoma	3	0
2017	Oklahoma	3	0
2017	Oklahoma	3	0
2017	Oklahoma	3	0
2017	Oklahoma	3	0
2017	Oklahoma	3	0
2017	Oklahoma	3	0
2017	Oklahoma	3	0
2017	Oklahoma	3	0
2017	Oklahoma	3	0
2017	Oklahoma	3	0
2017	Oklahoma	3	0
2017	Oklahoma	3	0
2017	Oklahoma	3	0
2017	Oklahoma	3	0
2017	Oklahoma	3	0
2017	Oklahoma	3	0
2017	Oklahoma	3	0
2017	Oklahoma	3	0
2017	Oklahoma	3	0
2017	Oklahoma	3	0
2017	Oklahoma	3	0
2017	Oklahoma	3	0
2017	Oklahoma	3	0
2017	Oklahoma	3	0
2017	Oklahoma	3	0
2017	Oklahoma	3	0
2017	Oklahoma	3	0
2017	Oklahoma	3	0
2017	Oklahoma	3	0
2017	Oklahoma	3	0
2017	Oklahoma	3	0
2017	Oklahoma	3	0
2017	Oklahoma	3	0
2017	Oklahoma	3	0
2017	Oklahoma	3	0
2017	Oklahoma	3	0
2017	Oklahoma	3	0
2017	Oklahoma	3	0
2017	Oklahoma	3	0
2017	Oklahoma	3	0
2017	Oklahoma	3	0
2017	Oklahoma	3	0
2017	Oklahoma	3	0
2017	Oklahoma	3	0
2017	Oklahoma	3	0
2017	Oklahoma	3	0
2017	Oklahoma	3	0
2017	Oklahoma	3	0
2017	Oklahoma	3	0
2017	Oklahoma	3	0
2017	Oklahoma	3	0
2017	Oklahoma	3	0
2017	Oklahoma	3	0
2017	Oklahoma	3	0
2017	Oklahoma	3	0
2017	Oklahoma	3	0
2017	Oklahoma	3	0
2017	Oklahoma	3	0
2017	Oklahoma	3	0
2017	Oklahoma	3	0
2017	Oklahoma	3	0
2017	Oklahoma	3	0
2017	Oklahoma	3	0
2017	Oklahoma	3	0
2017	Oklahoma	3	0
2017	Oklahoma	3	0
2017	Oklahoma	3	0
2017	Oklahoma	3	0
2017	Oklahoma	3	0
2017	Oklahoma	3	0
2017	Oklahoma	3	0
2017	Oklahoma	3	0
2017	Oklahoma	3	0
2017	Oklahoma	3	0
2017	Oklahoma	3	0
2017	Oklahoma	3	0
2017	Oklahoma	3	0
2017	Oklahoma	3	0
2017	Oklahoma	3	0
2017	Oklahoma	3	0
2017	Oklahoma	3	0
2017	Oklahoma	3	0
2017	Oklahoma	3	0
2017	Oklahoma	3	0
2017	Oklahoma	3	0
2017	Oklahoma	3	0
2017	Oklahoma	3	0
2017	Oklahoma	3	0
2017	Oklahoma	3	1
2017	Oklahoma	3	1
2017	Oklahoma	3	1
2017	Oklahoma	3	1
2017	Oklahoma	3	1
2017	Oklahoma	3	1
2017	Texas	1	0
2017	Texas	1	0
2017	Texas	1	0
2017	Texas	1	0
2017	Texas	1	0
2017	Texas	1	0
2017	Texas	1	0
2017	Texas	1	0
2017	Texas	1	0
2017	Texas	1	0
2017	Texas	1	0
2017	Texas	1	0
2017	Texas	1	1
2017	Texas	1	1
2017	Texas	2	0
2017	Texas	2	0
2017	Texas	2	0
2017	Texas	2	0
2017	Texas	2	0
2017	Texas	2	0
2017	Texas	2	0
2017	Texas	2	0
2017	Texas	2	0
2017	Texas	2	0
2017	Texas	2	0
2017	Texas	2	0
2017	Texas	2	0
2017	Texas	2	0
2017	Texas	2	0
2017	Texas	2	0
2017	Texas	2	0
2017	Texas	2	0
2017	Texas	2	1
2017	Texas	2	1
2017	Texas	3	0
2017	Texas	3	0
2017	Texas	3	0
2017	Texas	3	0
2017	Texas	3	0
2017	Texas	3	0
2017	Texas	3	0
2017	Texas	3	0
2017	Texas	3	0
2017	Texas	3	0
2017	Texas	3	0
2017	Texas	3	0
2017	Texas	3	0
2017	Texas	3	0
2017	Texas	3	0
2017	Texas	3	0
2017	Texas	3	0
2017	Texas	3	0
2017	Texas	3	0
2017	Texas	3	0
2017	Texas	3	0
2017	Texas	3	0
2017	Texas	3	0
2017	Texas	3	0
2017	Texas	3	0
2017	Texas	3	0
2017	Texas	3	0
2017	Texas	3	0
2017	Texas	3	1
2017	Texas	3	1
2018	New Mexico	1	0
2018	New Mexico	1	0
2018	New Mexico	1	0
2018	New Mexico	2	0
2018	New Mexico	3	0
2018	New Mexico	3	0
2018	New Mexico	3	0
2018	New Mexico	3	0
2018	New Mexico	3	0
2018	New Mexico	3	0
2018	New Mexico	3	0
2018	New Mexico	3	0
2018	New Mexico	3	0
2018	New Mexico	3	0
2018	New Mexico	3	0
2018	New Mexico	3	0
2018	New Mexico	3	1
2018	New Mexico	3	1
2018	New Mexico	3	1
2018	Oklahoma	1	0
2018	Oklahoma	1	0
2018	Oklahoma	1	0
2018	Oklahoma	1	0
2018	Oklahoma	1	0
2018	Oklahoma	1	0
2018	Oklahoma	1	0
2018	Oklahoma	1	0
2018	Oklahoma	1	0
2018	Oklahoma	1	1
2018	Oklahoma	2	0
2018	Oklahoma	2	0
2018	Oklahoma	2	0
2018	Oklahoma	2	0
2018	Oklahoma	2	0
2018	Oklahoma	2	0
2018	Oklahoma	2	0
2018	Oklahoma	2	0
2018	Oklahoma	2	0
2018	Oklahoma	2	0
2018	Oklahoma	2	0
2018	Oklahoma	2	0
2018	Oklahoma	2	0
2018	Oklahoma	2	0
2018	Oklahoma	2	0
2018	Oklahoma	2	0
2018	Oklahoma	2	0
2018	Oklahoma	2	0
2018	Oklahoma	2	0
2018	Oklahoma	2	0
2018	Oklahoma	2	0
2018	Oklahoma	2	0
2018	Oklahoma	2	0
2018	Oklahoma	2	0
2018	Oklahoma	2	0
2018	Oklahoma	2	0
2018	Oklahoma	2	0
2018	Oklahoma	2	0
2018	Oklahoma	2	1
2018	Oklahoma	2	1
2018	Oklahoma	2	1
2018	Oklahoma	3	0
2018	Oklahoma	3	0
2018	Oklahoma	3	0
2018	Oklahoma	3	0
2018	Oklahoma	3	0
2018	Oklahoma	3	0
2018	Oklahoma	3	0
2018	Oklahoma	3	0
2018	Oklahoma	3	0
2018	Oklahoma	3	0
2018	Oklahoma	3	0
2018	Oklahoma	3	0
2018	Oklahoma	3	0
2018	Oklahoma	3	0
2018	Oklahoma	3	0
2018	Oklahoma	3	0
2018	Oklahoma	3	0
2018	Oklahoma	3	0
2018	Oklahoma	3	0
2018	Oklahoma	3	0
2018	Oklahoma	3	0
2018	Oklahoma	3	0
2018	Oklahoma	3	0
2018	Oklahoma	3	0
2018	Oklahoma	3	0
2018	Oklahoma	3	0
2018	Oklahoma	3	0
2018	Oklahoma	3	0
2018	Oklahoma	3	0
2018	Oklahoma	3	0
2018	Oklahoma	3	0
2018	Oklahoma	3	0
2018	Oklahoma	3	0
2018	Oklahoma	3	0
2018	Oklahoma	3	0
2018	Oklahoma	3	0
2018	Oklahoma	3	0
2018	Oklahoma	3	0
2018	Oklahoma	3	0
2018	Oklahoma	3	0
2018	Oklahoma	3	0
2018	Oklahoma	3	0
2018	Oklahoma	3	0
2018	Oklahoma	3	0
2018	Oklahoma	3	0
2018	Oklahoma	3	0
2018	Oklahoma	3	0
2018	Oklahoma	3	0
2018	Oklahoma	3	0
2018	Oklahoma	3	0
2018	Oklahoma	3	0
2018	Oklahoma	3	0
2018	Oklahoma	3	0
2018	Oklahoma	3	0
2018	Oklahoma	3	0
2018	Oklahoma	3	0
2018	Oklahoma	3	0
2018	Oklahoma	3	0
2018	Oklahoma	3	0
2018	Oklahoma	3	0
2018	Oklahoma	3	0
2018	Oklahoma	3	0
2018	Oklahoma	3	0
2018	Oklahoma	3	0
2018	Oklahoma	3	0
2018	Oklahoma	3	0
2018	Oklahoma	3	0
2018	Oklahoma	3	0
2018	Oklahoma	3	0
2018	Oklahoma	3	0
2018	Oklahoma	3	0
2018	Oklahoma	3	0
2018	Oklahoma	3	0
2018	Oklahoma	3	0
2018	Oklahoma	3	0
2018	Oklahoma	3	0
2018	Oklahoma	3	0
2018	Oklahoma	3	1
2018	Oklahoma	3	1
2018	Oklahoma	3	1
2018	Oklahoma	3	1
2018	Oklahoma	3	1
2018	Oklahoma	3	1
2018	Oklahoma	3	1
2018	Oklahoma	3	1
2018	Oklahoma	3	1
2018	Oklahoma	3	1
2018	Oklahoma	3	1
2018	Oklahoma	3	1
2018	Oklahoma	3	1
2018	Oklahoma	3	1
2018	Oklahoma	3	1
2018	Oklahoma	3	1
2018	Oklahoma	3	1
2018	Oklahoma	3	1
2018	Oklahoma	3	1
2018	Oklahoma	3	1
2018	Texas	1	0
2018	Texas	1	0
2018	Texas	2	0
2018	Texas	2	0
2018	Texas	2	0
2018	Texas	2	0
2018	Texas	2	0
2018	Texas	2	0
2018	Texas	2	0
2018	Texas	2	1
2018	Texas	2	1
2018	Texas	2	1
2018	Texas	3	0
2018	Texas	3	0
2018	Texas	3	0
2018	Texas	3	0
2018	Texas	3	0
2018	Texas	3	0
2018	Texas	3	0
2018	Texas	3	0
2018	Texas	3	0
2018	Texas	3	0
2018	Texas	3	0
2018	Texas	3	0
2018	Texas	3	0
2018	Texas	3	0
2018	Texas	3	0
2018	Texas	3	1
2018	Texas	3	1
2018	Texas	3	1
2018	Texas	3	1
2018	Texas	3	1
2018	Texas	3	1
2018	Texas	3	1
2018	Texas	3	1
2018	Texas	3	1
2018	Texas	3	1
