# Supplementary material for: Integrated population modelling reveals potential drivers of demography from partially aligned data: a case study of snowy plover declines under human stressors
Source: PeerJ. 2021 Nov 15;9:e12475. doi: 10.7717/peerj.12475 (PMC8601057; doi:10.7717/peerj.12475)
Supplement: Supplemental Information 7 — year: year palmer: Palmer drought severity index aet: actual evapotranspiration prcp: precipitation tmax: maximum temperature tmin: minimum temperature wind: wind speed [file peerj-09-12475-s007.csv]

year	palmer	aet	prcp	tmax	tmin	wind
1998	-2.63333333333333	14.1111111111111	14.6666666666667	34.6333333333333	17.6444444444444	5.34444444444444
1999	2.48888888888889	82.3333333333333	86.6666666666667	30.4	16.2111111111111	5.33333333333333
2000	-0.4	53.2222222222222	55.8888888888889	32.4777777777778	17.6444444444444	5.36666666666667
2001	0.133333333333334	36.4444444444444	38.7777777777778	33.2888888888889	17.6111111111111	5.14444444444444
2002	-0.977777777777777	41.8888888888889	43.8888888888889	31.7333333333333	16.6777777777778	5.26666666666667
2003	-0.444444444444444	53	55.5555555555556	31.8555555555556	16.4333333333333	4.92222222222222
2004	2.5	68.8888888888889	72.4444444444444	31.4222222222222	16.4	5.03333333333333
2005	3.06666666666667	60.2222222222222	63	31.4	16.4	4.95555555555556
2006	-2.28888888888889	38	40	33.6555555555556	17.1222222222222	4.81111111111111
2007	4.1	84.2222222222222	88.6666666666667	29.5555555555556	15.7333333333333	4.13333333333333
2008	-1.68888888888889	59.1111111111111	62.2222222222222	32.7444444444444	16.8333333333333	5.8
2009	-0.3	83.4444444444444	87.7777777777778	32.3222222222222	16.8888888888889	4.6
2010	2.9	84.5555555555556	89	31.7777777777778	16.9111111111111	5.38888888888889
2011	-4.94444444444444	11	11.4444444444444	35.0555555555556	17.6666666666667	6.04444444444444
2012	-3.28888888888889	42.6666666666667	44.7777777777778	33.7777777777778	17.8222222222222	5.14444444444444
2013	-3.7	47.5555555555556	50.1111111111111	32.5222222222222	16.9	5.46666666666667
2014	-2.11111111111111	71	74.5555555555556	32.1222222222222	16.7777777777778	5.38888888888889
2015	3.53333333333333	117.777777777778	123.777777777778	31	16.6777777777778	4.81111111111111
2016	1.55555555555556	58.4444444444444	61.4444444444444	32.7333333333333	17	5.27777777777778
2017	-1.61111111111111	45.6666666666667	48	32.2444444444444	15.6444444444444	5.15555555555556
2018	-3.12222222222222	49.6666666666667	52.2222222222222	34.8	18.2444444444444	5.16666666666667
