# Supplementary material for: Integrated population modelling reveals potential drivers of demography from partially aligned data: a case study of snowy plover declines under human stressors
Source: PeerJ. 2021 Nov 15;9:e12475. doi: 10.7717/peerj.12475 (PMC8601057; doi:10.7717/peerj.12475)
Supplement: Supplemental Information 9 — year: year palmer: Palmer drought severity index aet: actual evapotranspiration prcp: precipitation tmax: maximum temperature tmin: minimum temperature wind: wind speed [file peerj-09-12475-s009.csv]

year	palmer	aet	prcp	tmax	tmin	wind
1998	3.53333333333333	79	74.3333333333333	33.4333333333333	18.5333333333333	4.5
1999	6.7	118.666666666667	110	30.6666666666667	17.3666666666667	4.83333333333333
2000	3.06666666666667	96.3333333333333	97	31.5	17.4	4.66666666666667
2001	2.13333333333333	77.3333333333333	77.3333333333333	32.7666666666667	18.1333333333333	4.63333333333333
2002	-2.03333333333333	92	96.6666666666667	31.6	17.3666666666667	4.83333333333333
2003	-0.766666666666665	55.3333333333333	56	31.7666666666667	16.9333333333333	4.23333333333333
2004	0.233333333333334	87.3333333333333	85	31.0666666666667	17.1666666666667	4.7
2005	-1.2	90	92.3333333333333	32.0333333333333	17.4	4.33333333333333
2006	-3.46666666666667	62.6666666666667	66	33.4333333333333	17.9666666666667	4.3
2007	5.23333333333333	143.666666666667	172.333333333333	30.6666666666667	18.1333333333333	3.83333333333333
2008	2.76666666666667	125.666666666667	131.333333333333	32.1666666666667	17.6333333333333	4.86666666666667
2009	-1.3	64.6666666666667	66.6666666666667	31.4333333333333	17.3	4
2010	1.36666666666667	110	115.666666666667	32.0333333333333	18.7	4.46666666666667
2011	-3.03333333333333	61.6666666666667	64.6666666666667	34.9	18.7333333333333	5.3
2012	-1.76666666666667	38.6666666666667	39	35.1333333333333	19.2333333333333	4.8
2013	-0.333333333333333	120.333333333333	126.666666666667	31.8333333333333	17.3666666666667	4.7
2014	-0.533333333333332	114	123.666666666667	31.4	17.2666666666667	4.7
2015	2.7	131.666666666667	162.666666666667	31.1666666666667	18.3	4.36666666666667
2016	1.5	100.333333333333	100.666666666667	32.2333333333333	18.1666666666667	4.26666666666667
2017	-1.03333333333333	84.6666666666667	79.6666666666667	32.0666666666667	17.2333333333333	4.36666666666667
2018	-4.63333333333333	81.3333333333333	85.3333333333333	34.3333333333333	19.3333333333333	3.9
